# Supplementary material
Source: PubMed Central journal article supplement (PMC10091180)
Supplement: jama-e233546-s001.pdf [file jama-e233546-s001.pdf]

## Supplemental Online Content

Self WH, Shotwell MS, Gibbs KW, et al; ACTIV-4 Host Tissue Investigators. Renin-angiotensin system modulation with synthetic angiotensin (1-7) and angiotensin II type 1 receptor–biased ligand in adults with COVID-19: two randomized clinical trials. *JAMA*. Published April 11, 2023. doi:10.1001/jama.2023.3546

### **eAppendix.** ACTIV-4 Host Tissue Platform Collaborators

**eFigure 1.** Schematic of the renin-angiotensin system (RAS) and trial agent targets

**eFigure 2.** Distribution of oxygen-free days in TXA-127 trial

**eFigure 3.** Distribution of oxygen-free days in TRV-027 trial

**eFigure 4.** TXA-127 trial WHO COVID-19 ordinal scale results over time

**eFigure 5.** TRV-027 trial WHO COVID-19 ordinal scale results over time

**eTable 1.** Enrolling sites

**eTable 2.** Eligibility criteria

**eTable 3.** Trial outcomes

**eTable 4.** Protocol-specified exempt serious events (PSESEs)

**eTable 5.** Results at the first interim analyses

**eTable 6.** Details of placebo groups

**eTable 7.** Additional baseline patient characteristics

**eTable 8.** Usual care in-hospital medications before randomization

**eTable 9.** Study drug delivery in the TXA-127 trial

**eTable 10.** Study drug delivery in the TRV-027 trial

**eTable 11.** Summaries of oxygen-free days for subgroup analyses in TXA-127 trial

**eTable 12.** Summaries of oxygen-free days for subgroup analyses in TRV-027 trial

**eTable 13.** Additional outcome results in TXA-127 trial

**eTable 14.** Additional outcome results in TRV-027 trial

**eTable 15.** PSESEs results in TXA-127 trial

**eTable 16.** PSESEs results in TRV-027 trial

**eTable 17.** Adverse events (AEs) in TXA-127 trial

**eTable 18.** Adverse events (AEs) in TRV-027 trial

This supplemental material has been provided by the authors to give readers additional information about their work.

## **eAppendix.** ACTIV-4 Host Tissue Platform Collaborators

### **Data Safety and Monitoring Board (DSMB)**

Richard C. Becker, MD; Gregory del Zoppo, MD; Peter Henke, MD; Richard Holubkov, PhD; Maryl Johnson, MD; Kim Kerr, MD; Hannah I. Lipman, MD; Fedor Lurie, MD, PhD; Bertram Pitt, MD; Sara K. Vesely, PhD; Jerome L. Fleg, MD.

### **Coordinating Center (Vanderbilt University Medical Center)**

Dave Aamodt, J'Mario Ayers; Debra Clark; Jessica Collins; Maya Cook; Sheri Dixon; John Graves; Courtney Jordan; Christopher J. Lindsell; Itzel Lopez; David McKeel; Dirk Orozco; Nelson Prato; Ally Qi; Madiha Qutab; Christa Stoughton; Krista Vermillion; Kelly Walsh; Stephanie Winchell; Taylor Young

### **Constant Therapeutics and Affiliates**

Richard Franklin; Elizabeth Wagner; Thomas Walther

## ***ENROLLING SITES***

### **Vanderbilt University Medical Center**

Jakea Johnson; Ryan Walsh, MD; Brian Bales, MD; Karen Miller, RN; Donna Torr, PharmD

### **Wake Forest University**

Harsh Barot, MD; Leigha Landreth, RN; Mary LaRose, RN; Lisa Parks, RN

### **University of New Mexico Health Sciences Center**

J. Pedro Teixeira; Sandra Cardenas; Juan A Ceniceros; Amy G Cunningham; Susan Kunkel; Debbie M Lovato

### **University of Nebraska Medical Center**

Brooklin Zimmerman MSN; Thanh Nguyen PhD; Wesley Zeger MD; Noah Wiedel MD

### **Washington University**

Stephanie Stilinovic; Caroline Foster; Jeanne Flannigan

### **Yale University**

Carolyn Brokowski; Jing Lu; Muriel Solberg; Dana Lee

### **Dignity Health Research Institute**

Charlotte Tanner; Annette Taylor; Jennine Zumbahl

### **Virginia Commonwealth University**

Aamer Syed, MD; Jessica Mason, MPH

### **University of Virginia**

Patrick E. H. Jackson; Rachael W. Coleman; Heather M. Haughey

### **University of Florida, Gainesville**

Kartik Cherabuddi; Nastasia James; Rebecca; Wakeman Murray; Christopher Duncan; Cynthia Montero

**Stanford University**

Angela J. Rogers; Jennifer G. Wilson; Rosemary Vojnik; Cynthia Perez

**Denver Health Medical Center**

David Wyles; Terra D. Hiller; Judy L. Oakes; Ana Z. Garcia

**Montefiore Medical Center**

Michelle Gong; Amira Mohamed; Luke Andrea; Rahul Nair; William Nkemdirim; Brenda Lopez; Sabah Boujid; Martha Torres; Ofelia Garcia

**University of Colorado**

Flora Martinez, Amiran Baduashvili, Jill Bastman, Lakshmi Chauhan, David J. Douin, Lani Finck, Ashley Licursi

**Emory Johns Creek Hospital/Emory St. Joseph's Hospital**

Caitlin ten Lohuis; Sophia Zhang; William Bender, MD; Santiago Tovar

**Beth Israel Deaconess Medical Center**

Sharon Hayes R.N., Nicholas Kurtzman, M.D., Elinita Rosseto, Douglas Scaffidi, Nathan Shapiro, M.D. M.P.H.

**Oregon Health and Science University**

Jonathan Pak; Gopal Allada; Genesis Briceno; Jose Peña; Minn Oh

**Johns Hopkins University**

Harith Ali, Sasha Beselman, Yolanda J Eby, Arber Shehu, Vitaliy Klimov

**University of Cincinnati**

R. Duncan Hite, Hammad Tanzeem, Chris Droege, Jessica Winter

**Cedars-Sinai Medical Center**

Susan Jackman; Antonina Caudill; Emad Bayoumi; Po-En Chen

**Cleveland Clinic Foundation/Cleveland Clinic Fairview Hospital**

Simon Mucha, MD; Niroshhan Thiruchelvam, MD; Matthew Siuba, MD; Omar Mehkri, MD

**Hennepin County Medical Center**

Brian E. Driver; Audrey Hendrickson; Olivia Kaus

**Ochsner Clinic Foundation**

Christina Ontiveros; Amy Riehm; Sylvia Landrum

**Cleveland Clinic Akron General**

Debra Hudock; Christopher Ensley; Valerie Shaner

**Temple University**

Nina Gentile, MD; Derek Isenberg, MD; Hannah Reimer; Paul Cincola

**University of Utah Health Sciences Center**

Estelle S. Harris; Sean J Callahan; Misty B Yamane; Macy AG Barrios

**Alexian Brothers Medical Center**

Neeraj Desai; Amit Bharara; Michael Keller; Prat Majumder; Carri Dohe

**Columbia University Medical Center**

Jeanine D'Armiento; Monica Goldklang; Gebhard Wagener; Laura Fonseca; Itzel Valezquez-Sanchez

**University of Washington (Harborview)**

Nicholas J Johnson; Emily Petersen; Megan Fuentes; Maranda Newton; Stephanie Gundel

**eFigure 1.** Schematic of the renin-angiotensin system (RAS) and trial agent targets

The renin-angiotensin system (RAS) involves a series of sequential steps that converts angiotensinogen to angiotensin (1-7) [Ang (1-7)]. SARS-CoV-2 binds the angiotensin converting enzyme 2 (ACE2), which results in cellular entry for the virus and decreased conversion of angiotensin II (Ang II) to Ang (1-7) for the human host. It is hypothesized that viral binding to ACE2 leads to higher relative activity of Ang II compared to Ang (1-7). Ang II activates the angiotensin II type 1 receptor (AT1R), which leads to inflammatory, vasoconstrictor, thrombotic, and fibrotic actions. Alternatively, Ang (1-7) activates MAS receptors, which leads to anti-inflammatory, vasodilatory, anti-thrombotic, and anti-fibrotic actions. Thus, SARS-CoV-2 infection may cause a pathological RAS imbalance with relatively high Ang II compared to Ang (1-7) activity, which could lead to organ injury, particularly in the lungs. TXA-127 is a synthetic Ang (1-7) analogue. We hypothesized that TXA-127 would improve outcomes for patients with COVID-19 by restoring Ang II-to-Ang (1-7) balance through exogenous administration of Ang (1-7). TRV-027 is a biased ligand at the AT1R that blocks the activity of Ang II and stimulates a beta-arrestin pathway that activates MAS receptors [mimicking the action of Ang (1-7)]. We hypothesized that TRV-027 would improve outcomes for patients with COVID-19 by restoring the balance of AT1R and MAS receptor activation.

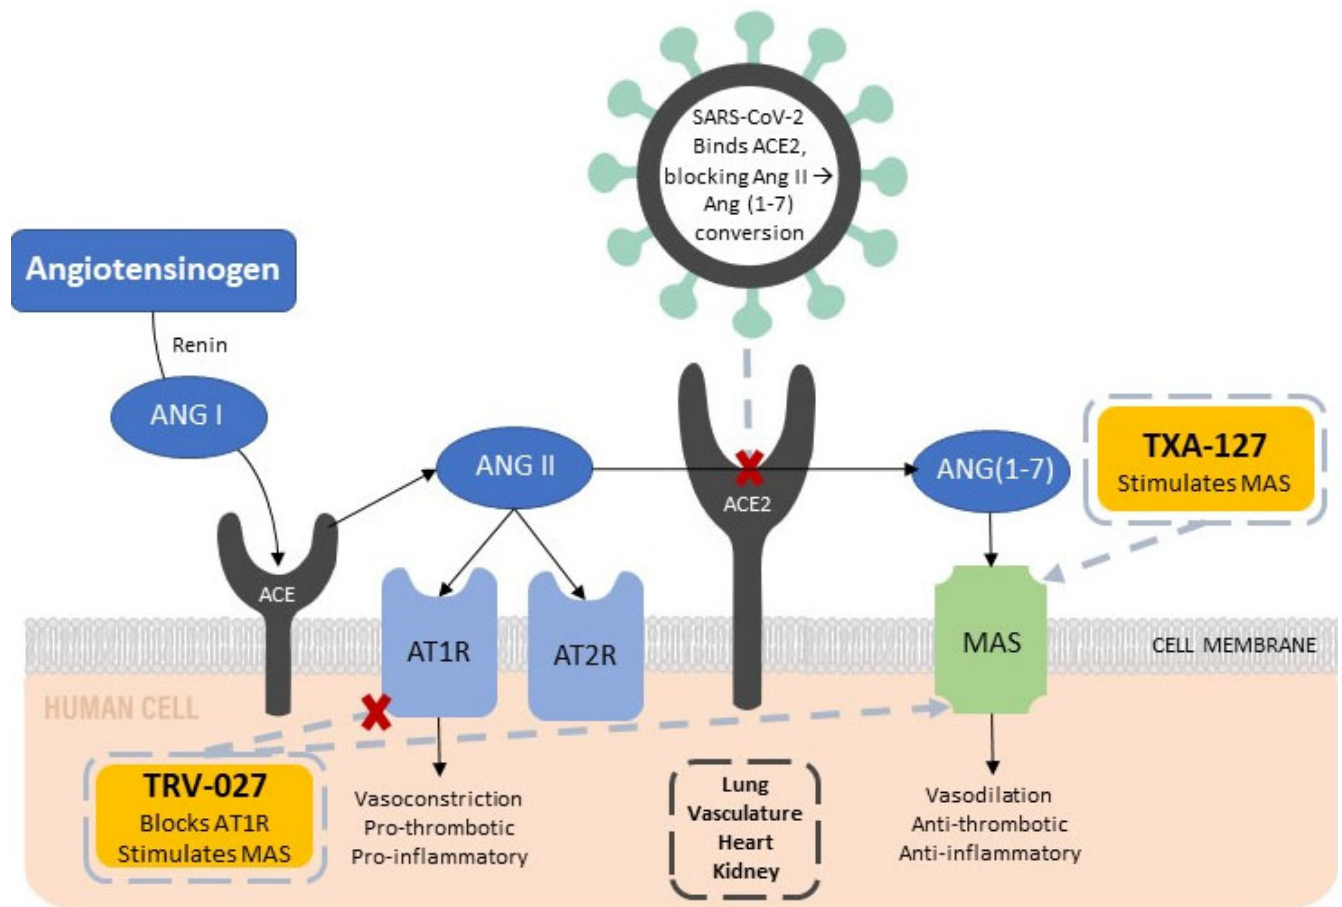

**eFigure 2.** Distribution of oxygen-free days in TXA-127 trial

The histograms display the proportion of patients at day 28 in each of the 30 categories of the oxygen-free days ordinal outcome, stratified by TXA-127 study drug vs placebo. The table below the histograms displays summary statistics for the oxygen-free days outcome.

**Adjusted Odds Ratio comparing distribution of oxygen-free days in TXA-127 group vs placebo:**

aOR: 0.88; 95% CI: 0.59 to 1.30

(aOR <1.0 is in the direction of inferiority for TXA-127 compared to placebo)

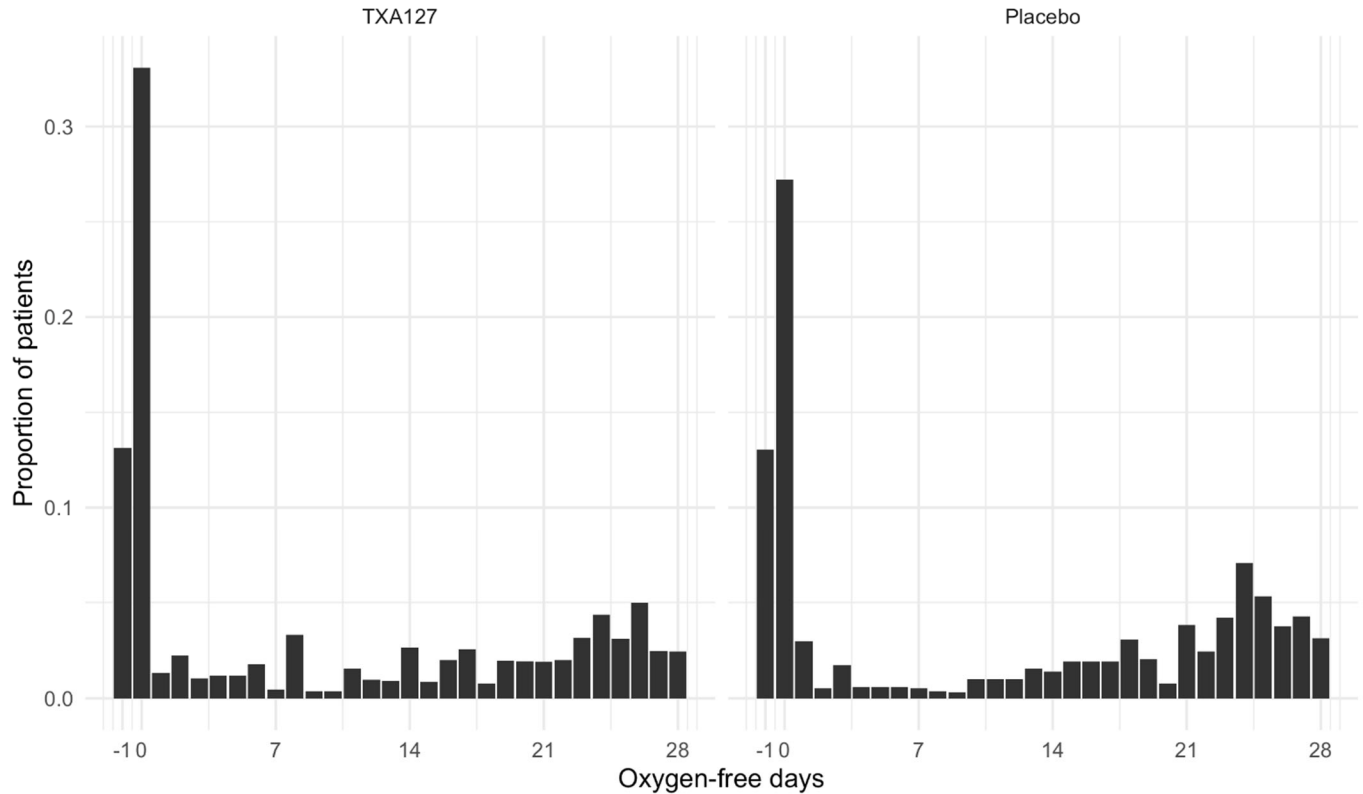

|                                                           | <b>TXA-127<br/>(n=170)</b> | <b>Placebo<br/>(n=173)</b> | <b>Adjusted absolute difference<br/>(95% CI)</b> |
|-----------------------------------------------------------|----------------------------|----------------------------|--------------------------------------------------|
| Mean oxygen-free days                                     | 9.0                        | 11.3                       | -0.80 (-3.21 to 1.62)                            |
| Median (IQR) oxygen-free days                             | 0 (0 – 21)                 | 13 (0 – 24)                | -1 (-8 to 3)                                     |
| -1 oxygen-free days (dead), no. (%)                       | 22 (12.9)                  | 22 (12.7)                  | Difference in percentage:<br>0.7 (-1.5, 2.9)     |
| 0 OFDs (oxygen use for 28 days), no. (%)                  | 55 (32.4)                  | 46 (26.6)                  | Difference in percentage:<br>2.1 (-4.3, 8.5)     |
| Patients with partially observed oxygen-free days, no (%) | 17 (10.0)                  | 18 (10.4)                  | N/A                                              |

**eFigure 3.** Distribution of oxygen-free days in TRV-027 trial

The histograms display the proportion of patients at day 28 in each of the 30 categories of the oxygen-free days ordinal outcome, stratified by TRV-027 study drug vs placebo. The table below the histograms displays summary statistics for the oxygen-free days outcome.

**Adjusted Odds Ratio comparing distribution of oxygen-free days in TRV-027 group vs placebo:**

aOR: 0.74; 95% CI: 0.48 to 1.13

(aOR <1.0 is in the direction of inferiority for TRV-027 compared to placebo)

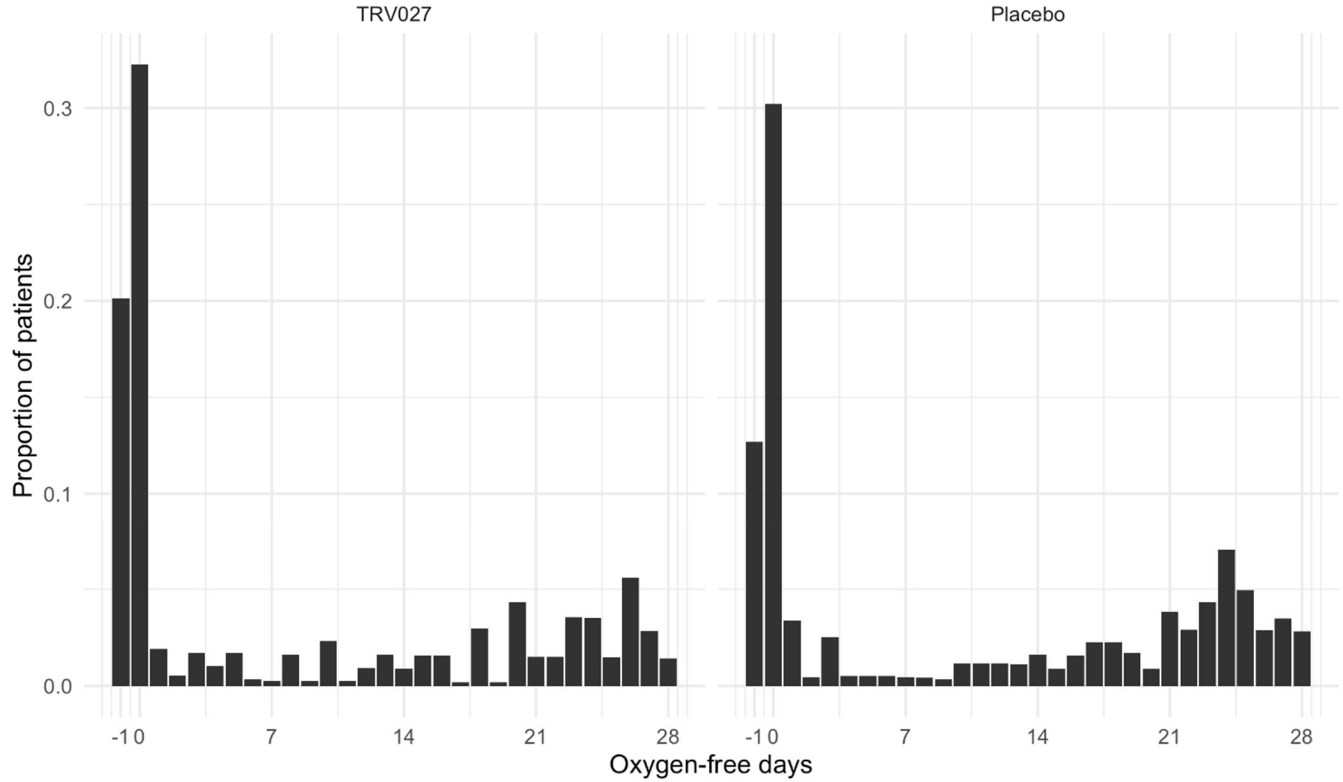

|                                                           | <b>TRV-027<br/>(n=145)</b> | <b>Placebo<br/>(n=145)</b> | <b>Adjusted absolute difference<br/>(95% CI)</b> |
|-----------------------------------------------------------|----------------------------|----------------------------|--------------------------------------------------|
| Mean oxygen-free days                                     | 8.1                        | 10.5                       | -1.86 (-4.50 to -0.70)                           |
| Median (IQR) oxygen-free days                             | 0 (0 – 20)                 | 3 (0 – 23)                 | -5 (-15 to 2)                                    |
| -1 oxygen-free days (dead), no. (%)                       | 29 (20.0)                  | 18 (12.4)                  | Difference in percentage:<br>2.0 (-0.9 to 5.0)   |
| 0 OFDs (oxygen use for 28 days), no. (%)                  | 46 (31.7)                  | 43 (29.7)                  | Difference in percentage:<br>4.8 (-2.0 to 11.6)  |
| Patients with partially observed oxygen-free days, no (%) | 10 (6.9)                   | 14 (9.7)                   | N/A                                              |

**eFigure 4.** TXA-127 trial WHO COVID-19 ordinal scale results over time

Distribution of the WHO COVID-19 clinical progression ordinal scale on Days 1-7, 14, 28, and 60 by treatment group in the TXA-127 trial.

|                                                                                                                                                                                                        |                   |                   |                   |
|--------------------------------------------------------------------------------------------------------------------------------------------------------------------------------------------------------|-------------------|-------------------|-------------------|
| Adjusted odds ratio (aOR) comparing TXA-127 to placebo based on the WHO COVID-19 clinical progression ordinal scale at key time points; aOR <1.0 is the direction of superiority for the active agent. |                   |                   |                   |
| <b>Day</b>                                                                                                                                                                                             | 14                | 28                | 60                |
| <b>aOR (95% CI)</b>                                                                                                                                                                                    | 1.12 (0.75, 1.67) | 0.88 (0.58, 1.35) | 0.68 (0.43, 1.07) |

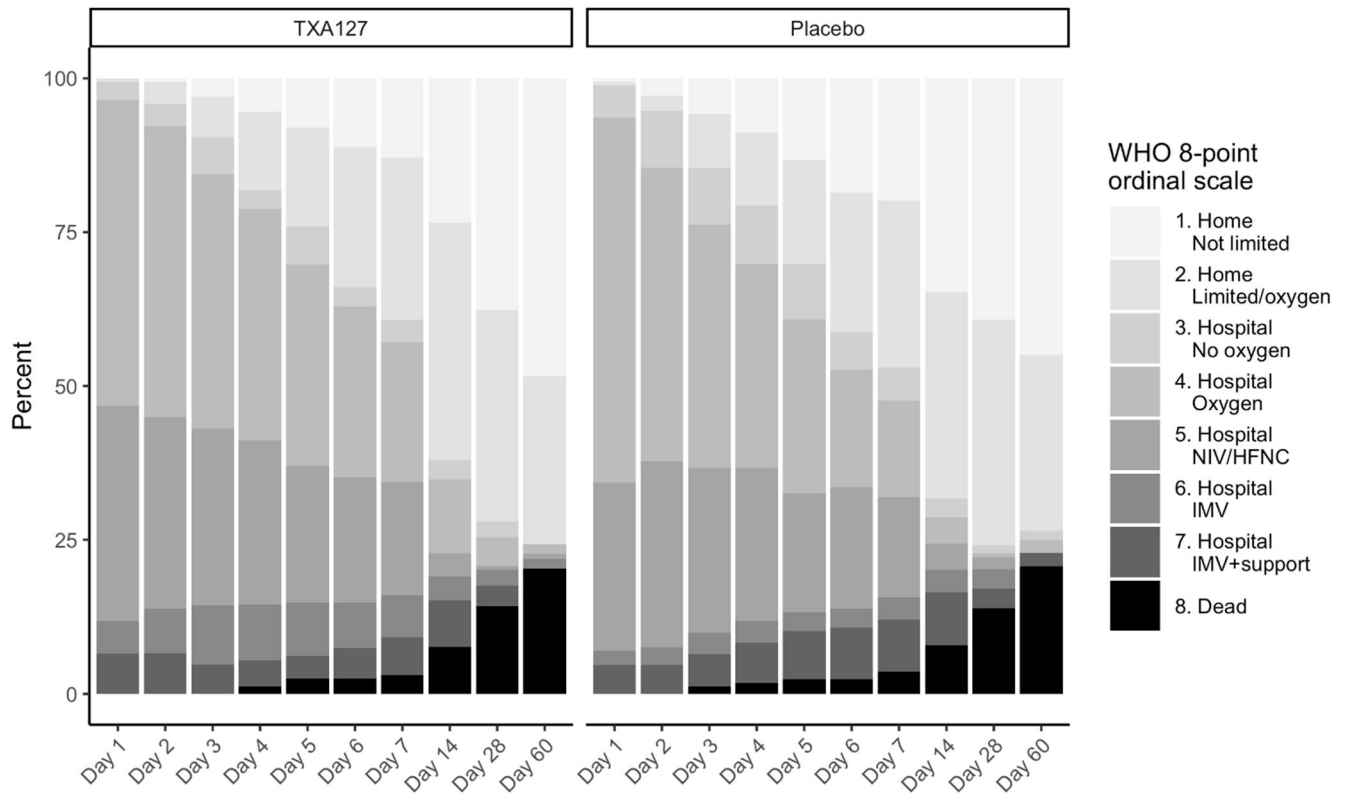



**eFigure 5.** TRV-027 trial WHO COVID-19 ordinal scale results over time

Distribution of the WHO COVID-19 clinical progression ordinal scale on Days 1-7, 14, 28, and 60 by treatment group in the TRV-027 trial.

|                                                                                                                                                                                                        |                   |                   |                   |
|--------------------------------------------------------------------------------------------------------------------------------------------------------------------------------------------------------|-------------------|-------------------|-------------------|
| Adjusted odds ratio (aOR) comparing TXA-127 to placebo based on the WHO COVID-19 clinical progression ordinal scale at key time points; aOR <1.0 is the direction of superiority for the active agent. |                   |                   |                   |
| <b>Day</b>                                                                                                                                                                                             | 14                | 28                | 60                |
| <b>aOR (95% CI)</b>                                                                                                                                                                                    | 1.41 (0.91, 2.19) | 0.97 (0.62, 1.53) | 1.03 (0.63, 1.67) |

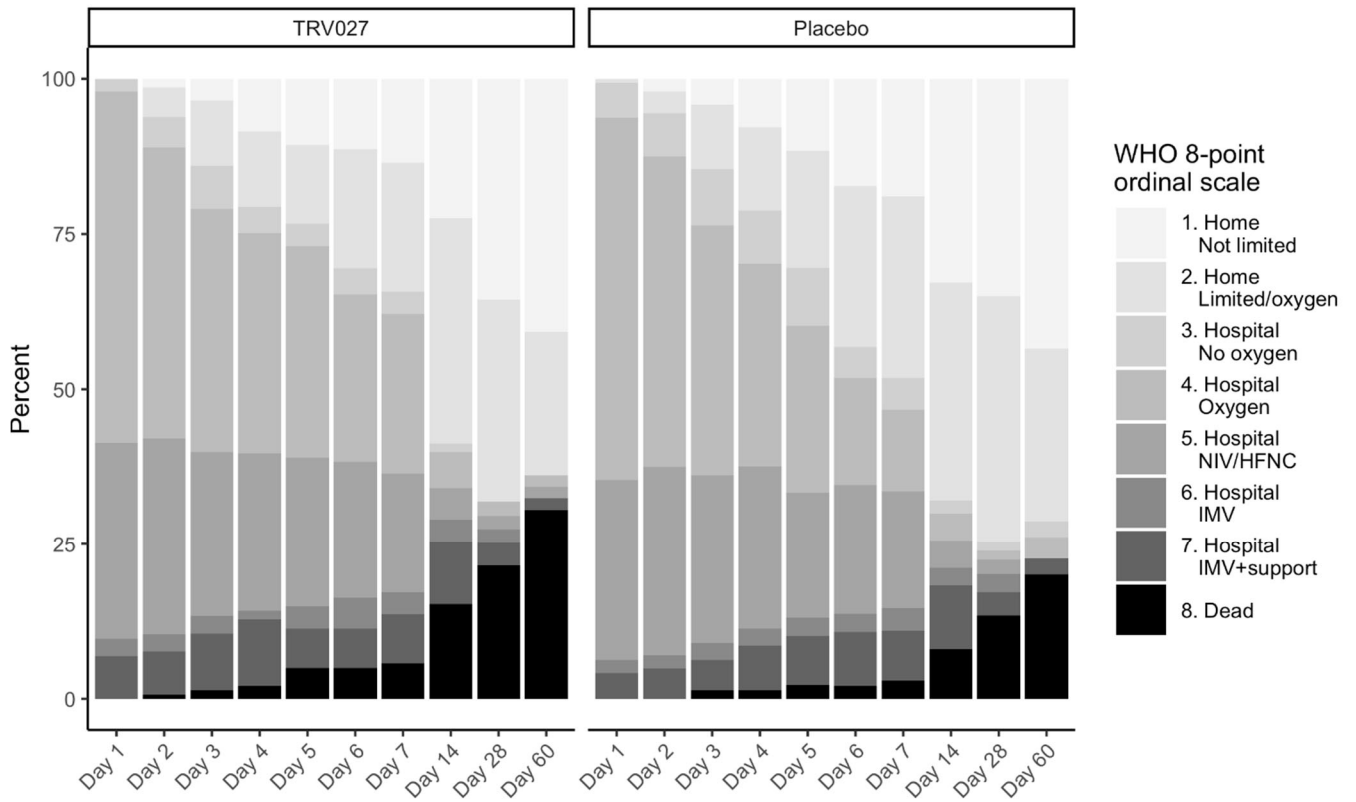

**eTable 1.** Enrolling sites

| <b>Enrolling Site Number</b> | <b>Hospital</b>                                 | <b>Number of In-patient Hospital Beds</b> | <b>Type of Hospital</b>                         | <b>TXA-127 and TRV-027 Eligible Randomizations (combined)</b> |
|------------------------------|-------------------------------------------------|-------------------------------------------|-------------------------------------------------|---------------------------------------------------------------|
| 1                            | Vanderbilt University Medical Center            | 1046                                      | Teaching Hospital Affiliated with a University  | 63                                                            |
| 2                            | Wake Forest University                          | 886                                       | Teaching Hospital Affiliated with a University  | 58                                                            |
| 3                            | University of New Mexico Health Sciences Center | 618                                       | Teaching Hospital Affiliated with a University  | 55                                                            |
| 4                            | University of Nebraska Medical Center           | 616                                       | Teaching Hospital Affiliated with a University  | 37                                                            |
| 5                            | Washington University                           | 375                                       | Teaching Hospital Affiliated with a University  | 33                                                            |
| 6                            | Yale University                                 | 1541                                      | Teaching Hospital Affiliated with a University  | 33                                                            |
| 7                            | Dignity Health Research Institute               |                                           | Community Hospital System                       | 24                                                            |
| 8                            | Virginia Commonwealth University                | 805                                       | Teaching Hospital Affiliated with a University  | 23                                                            |
| 9                            | University of Virginia                          | 671                                       | Teaching Hospital Affiliated with a University  | 23                                                            |
| 10                           | University of Florida, Gainesville              | 1037                                      | Teaching Hospital Affiliated with a University  | 21                                                            |
| 11                           | Newton-Wellesley Hospital                       | 273                                       | Community Hospital Affiliated with a University | 20                                                            |
| 12                           | Stanford University                             | 584                                       | Teaching Hospital Affiliated with a University  | 16                                                            |
| 13                           | Denver Health Medical Center                    | 472                                       | Public Hospital, academically affiliated        | 14                                                            |
| 14                           | University of Colorado Denver                   | 703                                       | Teaching Hospital Affiliated with a University  | 11                                                            |
| 15                           | Emory Johns Creek Hospital                      | 173                                       | Community Hospital, academically affiliated     | 11                                                            |
| 16                           | Beth Israel Deaconess Medical Center            | 673                                       | Teaching Hospital Affiliated with a University  | 11                                                            |
| 17                           | Oregon Health and Science University            | 549                                       | Teaching Hospital Affiliated with a University  | 10                                                            |
| 18                           | Moses Hospital of Montefiore Medical Center     | 1530                                      | Teaching Hospital Affiliated with a University  | 9                                                             |
| 19                           | Johns Hopkins University                        | 1162                                      | Teaching Hospital Affiliated with a University  | 9                                                             |
| 20                           | University of Cincinnati                        | 726                                       | Teaching Hospital Affiliated with a University  | 9                                                             |
| 21                           | Cleveland Clinic Foundation                     | 1300                                      | Teaching Hospital Affiliated with a University  | 8                                                             |

| <b>Enrolling Site Number</b> | <b>Hospital</b>                                      | <b>Number of In-patient Hospital Beds</b> | <b>Type of Hospital</b>                        | <b>TXA-127 and TRV-027 Eligible Randomizations (combined)</b> |
|------------------------------|------------------------------------------------------|-------------------------------------------|------------------------------------------------|---------------------------------------------------------------|
| 22                           | Cedars-Sinai Medical Center                          | 886                                       | Community Hospital, academically affiliated    | 6                                                             |
| 23                           | Intermountain Healthcare                             | 430                                       | Community Hospital, academically affiliated    | 6                                                             |
| 24                           | Hennepin County Medical Center                       | 469                                       | Public Hospital, academically affiliated       | 5                                                             |
| 25                           | Jack D. Weiler Hospital of Montefiore Medical Center | 369                                       | Teaching Hospital Affiliated with a University | 4                                                             |
| 26                           | Ochsner Health/Louisiana State University            | 345                                       | Teaching Hospital Affiliated with a University | 3                                                             |
| 27                           | Cleveland Clinic Akron General                       | 454                                       | Community Hospital, academically affiliated    | 2                                                             |
| 28                           | Cleveland Clinic Fairview Hospital                   | 488                                       | Community Hospital, academically affiliated    | 2                                                             |
| 29                           | Temple University                                    | 879                                       | Teaching Hospital Affiliated with a University | 2                                                             |
| 30                           | University of Utah Health Sciences Center            | 806                                       | Teaching Hospital Affiliated with a University | 1                                                             |
| 31                           | Alexian Brothers Medical Center                      |                                           | Community Hospital                             | 1                                                             |
| 32                           | Columbia University Medical Center                   | 738                                       | Teaching Hospital Affiliated with a University | 1                                                             |
| 33                           | University of Washington (Harborview)                | 413                                       | Teaching Hospital Affiliated with a University | 1                                                             |
| 34                           | Johns Hopkins Bayview Medical Center                 | 422                                       | Teaching Hospital Affiliated with a University | 1                                                             |
| 35                           | Emory St. Joseph's Hospital                          | 410                                       | Community Hospital, academically affiliated    | 1                                                             |

**eTable 2.** Eligibility criteria

To enter a trial, patients must have met all eligibility criteria for the ACTIV-4 Host Tissue Platform and the specific criteria for the individual trial. The platform level inclusion and exclusion criteria applied to both the TXA-127 and TRV-027 trials. Additionally, the TXA-127 and TRV-027 trials had trial-specific exclusion criteria based on the individual agent under study in that trial. Based on the trial-specific exclusion criteria, a patient could be eligible for one or both trials. Patients eligible for both trials were first randomized to active versus placebo and then to a trial. Patients eligible for both trials who randomized to placebo were included in the placebo group of both trials regardless of which placebo was received.

|                                     | <b>Inclusion Criteria</b>                                                                                                                                                                                                                                                                                                                                                                                                                                                                                                                                                                                                                                                                                                                                                                                                                                                                                                                                                                                                                                                                                                                                                                                                                                                                                                                                                                                 | <b>Exclusion Criteria</b>                                                                                                                                                                                                                                                                                                                                                                                                                                                                                                                                                                                                                                                                                                                                       |
|-------------------------------------|-----------------------------------------------------------------------------------------------------------------------------------------------------------------------------------------------------------------------------------------------------------------------------------------------------------------------------------------------------------------------------------------------------------------------------------------------------------------------------------------------------------------------------------------------------------------------------------------------------------------------------------------------------------------------------------------------------------------------------------------------------------------------------------------------------------------------------------------------------------------------------------------------------------------------------------------------------------------------------------------------------------------------------------------------------------------------------------------------------------------------------------------------------------------------------------------------------------------------------------------------------------------------------------------------------------------------------------------------------------------------------------------------------------|-----------------------------------------------------------------------------------------------------------------------------------------------------------------------------------------------------------------------------------------------------------------------------------------------------------------------------------------------------------------------------------------------------------------------------------------------------------------------------------------------------------------------------------------------------------------------------------------------------------------------------------------------------------------------------------------------------------------------------------------------------------------|
| <b>ACTIV-4 Host Tissue Platform</b> | <ol style="list-style-type: none"> <li>1. Hospitalized for COVID-19</li> <li>2. <math>\geq 18</math> years of age</li> <li>3. SARS-CoV-2 infection, documented by:               <ol style="list-style-type: none"> <li>a) a nucleic acid test (NAT) or equivalent testing within 3 days prior to randomization OR</li> <li>b) documented by NAT or equivalent testing more than 3 days prior to randomization AND progressive disease suggestive of ongoing SARS-CoV-2 infection per the responsible investigator (For non-NAT tests, only those deemed with equivalent specificity to NAT by the protocol team will be allowed. A central list of allowed non-NAT tests is maintained in Appendix F.)</li> </ol> </li> <li>4. Hypoxemia, defined as SpO<sub>2</sub> &lt;92% on room air, new receipt of supplemental oxygen to maintain SpO<sub>2</sub> <math>\geq 92\%</math>, or increased supplemental oxygen to maintain SpO<sub>2</sub> <math>\geq 92\%</math> for a patient on chronic oxygen therapy</li> <li>5. Symptoms or signs of acute COVID-19, defined as one or more of the following:               <ol style="list-style-type: none"> <li>a) cough</li> <li>b) reported or documented body temperature of 100.4° F or greater</li> <li>c) shortness of breath</li> <li>d) chest pain</li> <li>e) infiltrates on chest imaging (x-ray, CT scan, lung ultrasound)</li> </ol> </li> </ol> | <ol style="list-style-type: none"> <li>1. COVID-19 symptom onset &gt;14 days prior to randomization</li> <li>2. Hospitalized for &gt;72 hours prior to randomization</li> <li>3. Pregnancy</li> <li>4. Breastfeeding</li> <li>5. Prisoners</li> <li>6. End-stage renal disease (ESRD) on dialysis</li> <li>7. Patient and/or clinical team is not pursuing full medical management (if a patient has a Do Not Resuscitate order that precludes chest compressions in the event of a cardiac arrest but is otherwise pursuing full medical management, he/she is eligible for this trial).</li> <li>8. The treating clinician expects inability to participate in study procedures or participation would not be in the best interests of the patient</li> </ol> |

|                      | <b>Inclusion Criteria</b>                                      | <b>Exclusion Criteria</b>                                                                                                                                                                                                                                                                                                                                                                                                                                                                                                                                                                                                                                                                                                                                                                                                                                                                                                                                                                                                                              |
|----------------------|----------------------------------------------------------------|--------------------------------------------------------------------------------------------------------------------------------------------------------------------------------------------------------------------------------------------------------------------------------------------------------------------------------------------------------------------------------------------------------------------------------------------------------------------------------------------------------------------------------------------------------------------------------------------------------------------------------------------------------------------------------------------------------------------------------------------------------------------------------------------------------------------------------------------------------------------------------------------------------------------------------------------------------------------------------------------------------------------------------------------------------|
| <b>TXA-127 Trial</b> | No additional inclusion criteria beyond the platform criteria. | <ol style="list-style-type: none"> <li>1. Patient unable to participate or declines participation in the TXA127/Ang(1-7) arm.</li> <li>2. History of sensitivity (including angioedema) or allergic reaction to medication targeting the RAAS system including study medications or other allergy in the opinion of the investigator that contraindicates participation (not applicable to fostamatinib arm)</li> <li>3. Hemodynamic instability - defined as MAP &lt; 65 mmHg at time of randomization confirmed on two measurements 5 minutes apart OR vasopressors at or above norepinephrine equivalent of 0.1 mcg/kg/min in prior 4 hours to maintain MAP &gt; 65 mmHg.</li> <li>4. Known severe renal artery stenosis.</li> <li>5. Known significant left ventricular outflow obstruction, such as obstructive hypertrophic cardiomyopathy or severe aortic or mitral stenosis.</li> <li>6. Randomized in another trial evaluating RAAS modulation in the prior 30 days</li> </ol>                                                               |
| <b>TRV-027 Trial</b> | No additional inclusion criteria beyond the platform criteria. | <ol style="list-style-type: none"> <li>1. Participants on ARBs will be excluded from this study arm.</li> <li>2. Patient unable to participate or declines participation in the TRV027 arm.</li> <li>3. History of sensitivity (including angioedema) or allergic reaction to medication targeting the RAAS system including study medications or other allergy in the opinion of the investigator that contraindicates participation (not applicable to fostamatinib arm)</li> <li>4. Hemodynamic instability - defined as MAP &lt; 65 mmHg at time of randomization confirmed on two measurements 5 minutes apart OR vasopressors at or above norepinephrine equivalent of 0.1 mcg/kg/min in prior 4 hours to maintain MAP &gt; 65 mmHg.</li> <li>5. Known severe renal artery stenosis.</li> <li>6. Known significant left ventricular outflow obstruction, such as obstructive hypertrophic cardiomyopathy or severe aortic or mitral stenosis.</li> <li>7. Randomized in another trial evaluating RAAS modulation in the prior 30 days</li> </ol> |

**eTable 3.** Trial outcomes

Pre-specified clinical outcomes for the TXA-127 and TRV-027 trials are shown in this table. Exploratory biomarker-based outcomes will be reported separately in a different manuscript.

| <b>Outcome</b>                                            | <b>Definition</b>                                                                                                                                                                                                                                                                                                                                                                                                                                                                                                                          | <b>Variable type</b>         | <b>Analysis approach</b>                                                                                                                                                         | <b>Interpretation of OR &lt;1.0</b> |
|-----------------------------------------------------------|--------------------------------------------------------------------------------------------------------------------------------------------------------------------------------------------------------------------------------------------------------------------------------------------------------------------------------------------------------------------------------------------------------------------------------------------------------------------------------------------------------------------------------------------|------------------------------|----------------------------------------------------------------------------------------------------------------------------------------------------------------------------------|-------------------------------------|
| <b><i>Primary efficacy outcome</i></b>                    |                                                                                                                                                                                                                                                                                                                                                                                                                                                                                                                                            |                              |                                                                                                                                                                                  |                                     |
| Oxygen-free days to day 28                                | 28 minus the number of days between initiation and final liberation from new supplemental oxygen use during the 28 days following randomization. Patients who died before day 28 were coded as -1.                                                                                                                                                                                                                                                                                                                                         | Ordinal scale with 30 levels | Multivariable proportional odds regression model adjusted for age group (18-30, 31-65, or >65 years), sex at birth, and WHO COVID ordinal scale at baseline (level 4, 5, or 6-7) | Inferiority of active agent         |
| <b><i>Key secondary efficacy outcomes</i></b>             |                                                                                                                                                                                                                                                                                                                                                                                                                                                                                                                                            |                              |                                                                                                                                                                                  |                                     |
| All-cause all-location mortality at day 28                | Alive vs dead at study day 28                                                                                                                                                                                                                                                                                                                                                                                                                                                                                                              | Binary                       | Multivariable logistic regression model adjusted for age group (18-30, 31-65, or >65 years), sex at birth, and WHO COVID ordinal scale at baseline (level 4, 5, or 6-7)          | Superiority of active agent         |
| Alive and respiratory failure free at day 28              | Composite of alive and off respiratory support (no high flow nasal oxygen, non-invasive ventilation, or invasive mechanical ventilation) vs either dead or on respiratory support at day 28                                                                                                                                                                                                                                                                                                                                                | Binary                       | Multivariable logistic regression model adjusted for age group (18-30, 31-65, or >65 years), sex at birth, and WHO COVID ordinal scale at baseline (level 4, 5, or 6-7)          | Inferiority of active agent         |
| WHO COVID-19 clinical progression ordinal scale at day 28 | Patient's clinical status at day 28 classified based on the following 8 mutually exclusive categories:<br><ol style="list-style-type: none"> <li>1. Ambulatory – Not hospitalized, no limitation of activities</li> <li>2. Ambulatory – Not hospitalized with limitation of activities or home oxygen therapy</li> <li>3. Hospitalized Mild Disease – Hospitalized, no oxygen therapy</li> <li>4. Hospitalized Mild Disease – Oxygen by mask or nasal prongs</li> <li>5. Hospitalized Severe Disease – Non-invasive ventilation</li> </ol> | Ordinal scale with 8 levels  | Multivariable proportional odds regression model adjusted for age group (18-30, 31-65, or >65 years), sex at birth, and WHO COVID ordinal scale at baseline (level 4, 5, or 6-7) | Superiority of active agent         |

| Outcome                                                         | Definition                                                                                                                                                                                                                                                                                                         | Variable type | Analysis approach                                                                                                                                                       | Interpretation of OR <1.0   |
|-----------------------------------------------------------------|--------------------------------------------------------------------------------------------------------------------------------------------------------------------------------------------------------------------------------------------------------------------------------------------------------------------|---------------|-------------------------------------------------------------------------------------------------------------------------------------------------------------------------|-----------------------------|
|                                                                 | <p>or high-flow oxygen</p> <p>6. Hospitalized Severe Disease – Invasive mechanical ventilation</p> <p>7. Hospitalized Severe Disease – Invasive mechanical ventilation plus additional organ support with vasopressors, renal replacement therapy or extracorporeal membrane oxygenation (ECMO)</p> <p>8. Dead</p> |               |                                                                                                                                                                         |                             |
| <b><i>Other secondary efficacy outcomes</i></b>                 |                                                                                                                                                                                                                                                                                                                    |               |                                                                                                                                                                         |                             |
| Alive and oxygen free at 14 days                                | Composite of alive and off new supplemental oxygen therapy vs either dead or on new supplemental oxygen therapy at day 14                                                                                                                                                                                          | Binary        | Multivariable logistic regression model adjusted for age group (18-30, 31-65, or >65 years), sex at birth, and WHO COVID ordinal scale at baseline (level 4, 5, or 6-7) | Inferiority of active agent |
| Alive and oxygen free at 28 days                                | Composite of alive and off new supplemental oxygen therapy vs either dead or on new supplemental oxygen therapy at day 28                                                                                                                                                                                          | Binary        | Multivariable logistic regression model adjusted for age group (18-30, 31-65, or >65 years), sex at birth, and WHO COVID ordinal scale at baseline (level 4, 5, or 6-7) | Inferiority of active agent |
| Alive and respiratory failure free at 14 days                   | Composite of alive and off respiratory support (no high flow nasal oxygen, non-invasive ventilation, or invasive mechanical ventilation) vs either dead or on respiratory support at day 14                                                                                                                        | Binary        | Multivariable logistic regression model adjusted for age group (18-30, 31-65, or >65 years), sex at birth, and WHO COVID ordinal scale at baseline (level 4, 5, or 6-7) | Inferiority of active agent |
| Alive and free of new invasive mechanical ventilation at day 14 | Composite of alive and off new invasive mechanical ventilation vs either dead or on invasive mechanical ventilation at day 14                                                                                                                                                                                      | Binary        | Multivariable logistic regression model adjusted for age group (18-30, 31-65, or >65 years), sex at birth, and WHO COVID ordinal scale at baseline (level 4, 5, or 6-7) | Inferiority of active agent |
| Alive and free of new invasive mechanical ventilation at day 28 | Composite of alive and off new invasive mechanical ventilation vs either dead or on invasive mechanical ventilation at day 28                                                                                                                                                                                      | Binary        | Multivariable logistic regression model adjusted for age group (18-30, 31-65, or >65 years), sex at birth, and WHO COVID ordinal                                        | Inferiority of active agent |

| <b>Outcome</b>                                            | <b>Definition</b>                                                                                                                                                                         | <b>Variable type</b>         | <b>Analysis approach</b>                                                                                                                                                         | <b>Interpretation of OR &lt;1.0</b> |
|-----------------------------------------------------------|-------------------------------------------------------------------------------------------------------------------------------------------------------------------------------------------|------------------------------|----------------------------------------------------------------------------------------------------------------------------------------------------------------------------------|-------------------------------------|
|                                                           |                                                                                                                                                                                           |                              | scale at baseline (level 4, 5, or 6-7)                                                                                                                                           |                                     |
| In-hospital mortality                                     | Died prior to hospital discharge vs survived to hospital discharge based on the index hospitalization in which the patient was enrolled in the trial                                      | Binary                       | Multivariable logistic regression model adjusted for age group (18-30, 31-65, or >65 years), sex at birth, and WHO COVID ordinal scale at baseline (level 4, 5, or 6-7)          | Superiority of active agent         |
| 60-day mortality                                          | Dead vs alive at day 60                                                                                                                                                                   | Binary                       | Multivariable logistic regression model adjusted for age group (18-30, 31-65, or >65 years), sex at birth, and WHO COVID ordinal scale at baseline (level 4, 5, or 6-7)          | Superiority of active agent         |
| 90-day mortality                                          | Dead vs alive at day 90                                                                                                                                                                   | Binary                       | Multivariable logistic regression model adjusted for age group (18-30, 31-65, or >65 years), sex at birth, and WHO COVID ordinal scale at baseline (level 4, 5, or 6-7)          | Superiority of active agent         |
| WHO COVID-19 clinical progression ordinal scale at day 14 | Patient's clinical status at day 14 classified based on the 8 mutually exclusive categories defined above.                                                                                | Ordinal scale with 8 levels  | Multivariable proportional odds regression model adjusted for age group (18-30, 31-65, or >65 years), sex at birth, and WHO COVID ordinal scale at baseline (level 4, 5, or 6-7) | Superiority of active agent         |
| WHO COVID-19 clinical progression ordinal scale at day 60 | Patient's clinical status at day 60 classified based on the 8 mutually exclusive categories defined above.                                                                                | Ordinal scale with 8 levels  | Multivariable proportional odds regression model adjusted for age group (18-30, 31-65, or >65 years), sex at birth, and WHO COVID ordinal scale at baseline (level 4, 5, or 6-7) | Superiority of active agent         |
| Hospital-free days through day 28                         | 28 minus the number of days between randomization and hospital discharge for the index hospital admission in which the patient was enrolled in the trial. Patients who died before day 28 | Ordinal scale with 30 levels | Multivariable proportional odds regression model adjusted for age group (18-30, 31-65, or >65 years), sex at birth, and                                                          | Inferiority of active agent         |



| Outcome                                      | Definition                                                                                                                                                                                                                                                                        | Variable type                | Analysis approach                                                                                                                                                                | Interpretation of OR <1.0             |
|----------------------------------------------|-----------------------------------------------------------------------------------------------------------------------------------------------------------------------------------------------------------------------------------------------------------------------------------|------------------------------|----------------------------------------------------------------------------------------------------------------------------------------------------------------------------------|---------------------------------------|
|                                              | were coded as -1. Patients who remained hospitalized after day 28 were coded as 0.                                                                                                                                                                                                |                              | WHO COVID ordinal scale at baseline (level 4, 5, or 6-7)                                                                                                                         |                                       |
| Respiratory-failure-free days through day 28 | 28 minus the number of days between initiation and final liberation from respiratory support (high flow nasal oxygen, non-invasive ventilation, or invasive mechanical ventilation) during the 28 days following randomization. Patients who died before day 28 were coded as -1. | Ordinal scale with 30 levels | Multivariable proportional odds regression model adjusted for age group (18-30, 31-65, or >65 years), sex at birth, and WHO COVID ordinal scale at baseline (level 4, 5, or 6-7) | Inferiority of active agent           |
| Ventilator-free days through day 28          | 28 minus the number of days between initiation and final liberation from invasive mechanical ventilation during the 28 days following randomization. Patients who died before day 28 were coded as -1.                                                                            | Ordinal scale with 30 levels | Multivariable proportional odds regression model adjusted for age group (18-30, 31-65, or >65 years), sex at birth, and WHO COVID ordinal scale at baseline (level 4, 5, or 6-7) | Inferiority of active agent           |
| <b><i>Safety outcomes</i></b>                |                                                                                                                                                                                                                                                                                   |                              |                                                                                                                                                                                  |                                       |
| Allergic reaction through day 7              | Angioedema or another acute reaction proximate to study drug administration that the site investigator judged to be possibly related to a study drug allergy. Patients were coded as no allergic reaction vs $\geq 1$ allergic reaction.                                          | Binary                       | Multivariable logistic regression model adjusted for age group (18-30, 31-65, or >65 years), sex at birth, and WHO COVID ordinal scale at baseline (level 4, 5, or 6-7)          | Fewer safety events with active agent |
| Allergic reaction through day 28             | Same definition as above for allergic reaction through day 7                                                                                                                                                                                                                      | Binary                       | Multivariable logistic regression model adjusted for age group (18-30, 31-65, or >65 years), sex at birth, and WHO COVID ordinal scale at baseline (level 4, 5, or 6-7)          | Fewer safety events with active agent |
| New renal replacement therapy through day 7  | Initiation of renal replacement therapy prior to day 28 in a patient not on renal replacement therapy at randomization.                                                                                                                                                           | Binary                       | Multivariable logistic regression model adjusted for age group (18-30, 31-65, or >65 years), sex at birth, and WHO COVID ordinal scale at baseline (level 4, 5, or 6-7)          | Fewer safety events with active agent |

| <b>Outcome</b>                               | <b>Definition</b>                                                                                                                                                                                                                                   | <b>Variable type</b> | <b>Analysis approach</b>                                                                                                                                                | <b>Interpretation of OR &lt;1.0</b>   |
|----------------------------------------------|-----------------------------------------------------------------------------------------------------------------------------------------------------------------------------------------------------------------------------------------------------|----------------------|-------------------------------------------------------------------------------------------------------------------------------------------------------------------------|---------------------------------------|
| New renal replacement therapy through day 28 | Same definition as above for new renal replacement therapy through day 7                                                                                                                                                                            | Binary               | Multivariable logistic regression model adjusted for age group (18-30, 31-65, or >65 years), sex at birth, and WHO COVID ordinal scale at baseline (level 4, 5, or 6-7) | Fewer safety events with active agent |
| Hypotension through day 7                    | A low blood pressure leading to initiation or increase in vasopressor therapy, administration of a fluid bolus of $\geq 500$ ml, or discontinuation of the study drug. Patients were coded as no hypotensive events vs $\geq 1$ hypotensive events. | Binary               | Multivariable logistic regression model adjusted for age group (18-30, 31-65, or >65 years), sex at birth, and WHO COVID ordinal scale at baseline (level 4, 5, or 6-7) | Fewer safety events with active agent |
| Hypotension through day 28                   | Same definition as above for hypotension through day 7                                                                                                                                                                                              | Binary               | Multivariable logistic regression model adjusted for age group (18-30, 31-65, or >65 years), sex at birth, and WHO COVID ordinal scale at baseline (level 4, 5, or 6-7) | Fewer safety events with active agent |

**eTable 4.** Protocol-specified exempt serious events (PSESEs)

Protocol specified exempt serious events (PSESEs) were medical events that were systemically collected for all enrolled patients so that data on these events did not rely on *ad hoc* adverse event reporting. PSESEs were collected through day 60.

| <b><i>PSESE<br/>(collected through day 60)</i></b>                              | <b>Definition</b>                                                                                                                            | <b>Variable type</b> | <b>Analysis approach</b>         |
|---------------------------------------------------------------------------------|----------------------------------------------------------------------------------------------------------------------------------------------|----------------------|----------------------------------|
| Seizure                                                                         | Clinically identified seizure                                                                                                                | Binary               | Frequency counts and proportions |
| Stroke                                                                          | Clinically identified ischemic or hemorrhagic stroke                                                                                         | Binary               | Frequency counts and proportions |
| Arrhythmia (atrial or ventricular)                                              | Clinically identified atrial or ventricular arrhythmia                                                                                       | Binary               | Frequency counts and proportions |
| Cardiomyopathy                                                                  | Clinically identified cardiomyopathy                                                                                                         | Binary               | Frequency counts and proportions |
| Cardiac arrest                                                                  | Clinically identified cardiac arrest, regardless of cardiac rhythm                                                                           | Binary               | Frequency counts and proportions |
| Myocardial injury                                                               | Clinical identified myocardial injury that was judged not to be due to acute coronary syndrome                                               | Binary               | Frequency counts and proportions |
| Acute coronary syndrome                                                         | Clinically identified acute coronary syndrome                                                                                                | Binary               | Frequency counts and proportions |
| Hypertension                                                                    | Systolic blood pressure >160 mm Hg or diastolic blood pressure >100 mm Hg plus clinical symptoms attributed to elevated blood pressure       | Binary               | Frequency counts and proportions |
| Hypoxemia requiring supplemental oxygen                                         | New supplement oxygen treatment                                                                                                              | Binary               | Frequency counts and proportions |
| Acute respiratory distress syndrome                                             | Clinically identified acute respiratory distress syndrome                                                                                    | Binary               | Frequency counts and proportions |
| Receipt of non-invasive or invasive ventilation                                 | New non-invasive or invasive ventilation                                                                                                     | Binary               | Frequency counts and proportions |
| Receipt of extracorporeal membrane oxygenation (ECMO)                           | New receipt of ECMO                                                                                                                          | Binary               | Frequency counts and proportions |
| Elevation of aspartate aminotransferase (AST) or alanine aminotransferase (ALT) | Clinically identified ALT or AST elevations, or ALT > 136U/L for Men, ALT > 96U/L for Women, or AST > 128U/L for Men, AST > 104U/L for Women | Binary               | Frequency counts and proportions |
| Acute pancreatitis                                                              | Clinically identified acute pancreatitis                                                                                                     | Binary               | Frequency counts and proportions |
| Acute kidney injury                                                             | Clinically identified acute kidney injury or criteria for KDIGO AKI stage I or greater (serum creatinine criteria only)                      | Binary               | Frequency counts and proportions |
| Receipt of renal replacement therapy                                            | New receipt of renal replacement therapy                                                                                                     | Binary               | Frequency counts and proportions |
| Symptomatic hypoglycemia                                                        | Blood glucose level <60 mg/dl and clinically identified symptoms related to low blood glucose                                                | Binary               | Frequency counts and proportions |
| Neutropenia                                                                     | Clinically identified neutropenia or ANC < 500 cells/mcl                                                                                     | Binary               | Frequency counts and proportions |

| <b><i>PSESE</i></b><br><b><i>(collected through day 60)</i></b> | <b>Definition</b>                                                            | <b>Variable type</b> | <b>Analysis approach</b>         |
|-----------------------------------------------------------------|------------------------------------------------------------------------------|----------------------|----------------------------------|
| Lymphopenia                                                     | Clinically identified lymphopenia or ALC < 1000 cells/mcl                    | Binary               | Frequency counts and proportions |
| Anemia                                                          | Clinically identified anemia or Hgb < 7g/dL for Men, Hgb < 6.5g/dL for Women | Binary               | Frequency counts and proportions |
| Thrombocytopenia                                                | Clinically identified thrombocytopenia or platelets < 100 thousand/L         | Binary               | Frequency counts and proportions |
| Venous thromboembolism                                          | Clinically identified new deep vein thrombosis or pulmonary embolism         | Binary               | Frequency counts and proportions |
| Severe dermatologic reaction                                    | New severe skin reaction (e.g., Stevens-Johnson Syndrome)                    | Binary               | Frequency counts and proportions |

**eTable 5.** Results at the first interim analyses

Both the TXA-127 and TRV-027 trials halted at the first interim analysis on April 20, 2022 based on meeting the pre-specified stopping criterion for <5% probability of superiority (which is the same as >95% probability for inferiority) of the active agent compared with placebo. Results reviewed by the DSMB at the first interim analysis are shown here. The remainder of the manuscript and supplementary materials report the final results that include all patients, including those not part of the interim analysis. The first 200 patients in each trial were included in the interim analyses. All patients who were enrolled prior to the halting of enrollment were included in the final analyses.

|                                                                            | <b>Interim Analysis</b> | <b>Final Analysis</b> |
|----------------------------------------------------------------------------|-------------------------|-----------------------|
| <b><i>TXA-127 Trial</i></b>                                                |                         |                       |
| Sample size (active + placebo patients), no.                               | 200                     | 343                   |
| Oxygen-free days aOR (95% CI)                                              | 0.628 (0.373, 1.057)    | 0.879 (0.594, 1.300)  |
| Probability of superiority for active vs placebo based on oxygen-free days | 0.040                   | 0.259                 |
| <b><i>TRV-027 Trial</i></b>                                                |                         |                       |
| Sample size (active + placebo patients), no.                               | 200                     | 290                   |
| Oxygen-free days aOR (95% CI)                                              | 0.611 (0.364, 1.025)    | 0.740 (0.483, 1.134)  |
| Probability of superiority for active vs placebo based on oxygen-free days | 0.031                   | 0.083                 |

**eTable 6.** Details of placebo groups

**(a) TXA-127 trial**

The modified intention-to-treat population for efficacy analyses in the TXA-127 trial included 173 patients, including 135 patients included in both the TXA-127 trial and the TRV-027 trial and 38 patients included in the TXA-127 trial only. The type of placebo received is detailed in the table below.

| <b>TXA-127 trial: type of placebo received for the 173 patients in the placebo group</b> |                |
|------------------------------------------------------------------------------------------|----------------|
| <b>Type of placebo</b>                                                                   | <b>no. (%)</b> |
| Placebo mimic of TXA-127                                                                 | 92 (53.2)      |
| Placebo mimic of TRV-027                                                                 | 71 (41.0)      |
| Placebo mimic of fostamatinib                                                            | 10 (5.8)       |

**(b) TRV-027 trial**

The modified intention-to-treat population for efficacy analyses in the TRV-027 trial included 145 patients, including 135 patients included in both the TXA-127 trial and the TRV-027 trial and 10 patients included in the TRV-027 trial only. The type of placebo received is detailed in the table below.

| <b>TRV-027 trial: type of placebo received for the 145 patients in the placebo group</b> |                |
|------------------------------------------------------------------------------------------|----------------|
| <b>Type of placebo</b>                                                                   | <b>no. (%)</b> |
| Placebo mimic of TXA-127                                                                 | 54 (37.2)      |
| Placebo mimic of TRV-027                                                                 | 79 (54.5)      |
| Placebo mimic of fostamatinib                                                            | 12 (8.3)       |

**eTable 7.** Additional baseline patient characteristics

Baseline patient characteristics for the modified intention-to-treat populations used for efficacy analyses not included in Table 1.

| Characteristic                                                            | TXA-127 Trial      |                    | TRV-027 Trial      |                    |
|---------------------------------------------------------------------------|--------------------|--------------------|--------------------|--------------------|
|                                                                           | TXA-127<br>(n=170) | Placebo<br>(n=173) | TRV-027<br>(n=145) | Placebo<br>(n=145) |
| Age group, no (%)                                                         |                    |                    |                    |                    |
| 18 – 30 years                                                             | 11 (6.5)           | 7 (4.0)            | 5 (3.4)            | 7 (4.8)            |
| 31 – 64 years                                                             | 106 (62.4)         | 120 (69.4)         | 100 (69.0)         | 99 (68.3)          |
| ≥65 years                                                                 | 53 (31.2)          | 46 (26.6)          | 40 (27.6)          | 39 (26.9)          |
| Patient location prior to presentation to the enrolling hospital, no. (%) |                    |                    |                    |                    |
| Home                                                                      | 151 (88.8)         | 160 (92.5)         | 132 (91.0)         | 132 (91.0)         |
| Nursing home                                                              | 3 (1.8)            | 2 (1.2)            | 0 (0.0)            | 2 (1.4)            |
| Rehabilitation facility                                                   | 0 (0)              | 2 (1.2)            | 1 (0.7)            | 2 (1.4)            |
| Skilled nursing facility                                                  | 1 (0.6)            | 1 (0.6)            | 0 (0)              | 1 (0.7)            |
| Long-term acute care facility                                             | 0 (0)              | 1 (0.6)            | 0 (0)              | 1 (0.7)            |
| Outside hospital ward                                                     | 9 (5.3)            | 5 (2.9)            | 7 (4.8)            | 6 (4.1)            |
| Outside ICU                                                               | 2 (1.2)            | 0 (0)              | 0 (0)              | 0 (0)              |
| Other                                                                     | 4 (2.4)            | 2 (1.2)            | 5 (3.5)            | 1 (0.7)            |
| Patient location at enrollment, no. (%)                                   |                    |                    |                    |                    |
| Emergency department                                                      | 37 (21.8)          | 32 (18.5)          | 25 (17.2)          | 31 (21.4)          |
| Inpatient ward                                                            | 90 (52.9)          | 99 (57.2)          | 84 (57.9)          | 81 (55.9)          |
| ICU                                                                       | 42 (24.7)          | 42 (24.3)          | 36 (24.8)          | 33 (22.8)          |
| Other                                                                     | 1 (0.6)            | 0 (0)              | 0 (0)              | 0 (0)              |
| Chronic medical conditions, no. (%)                                       |                    |                    |                    |                    |
| Asthma                                                                    | 17 (10.0)          | 29 (16.8)          | 18 (12.4)          | 24 (16.6)          |
| Interstitial lung disease                                                 | 4 (2.4)            | 4 (2.3)            | 6 (4.1)            | 4 (2.8)            |
| Prior myocardial infarction or coronary artery disease                    | 24 (14.1)          | 17 (9.8)           | 14 (9.7)           | 14 (9.7)           |
| Atrial fibrillation or flutter                                            | 12 (7.1)           | 13 (7.5)           | 12 (8.3)           | 9 (6.2)            |
| Stroke or transient ischemic attack                                       | 11 (6.5)           | 6 (3.5)            | 3 (2.1)            | 7 (4.8)            |
| Peripheral vascular disease                                               | 3 (1.8)            | 6 (3.5)            | 2 (1.4)            | 4 (2.8)            |
| Deep vein thrombosis or pulmonary embolism                                | 7 (4.1)            | 12 (6.9)           | 7 (4.8)            | 9 (6.2)            |
| Sickle cell disease                                                       | 0 (0)              | 0 (0)              | 1 (0.7)            | 1 (0.7)            |
| HIV infection without AIDS                                                | 0 (0)              | 0 (0)              | 0 (0)              | 0 (0)              |
| AIDS                                                                      | 0 (0)              | 1 (0.6)            | 0 (0)              | 0 (0)              |
| Connective tissue disease                                                 | 10 (5.9)           | 6 (3.5)            | 5 (3.4)            | 5 (3.4)            |
| Peptic ulcer disease                                                      | 1 (0.6)            | 1 (0.6)            | 1 (0.7)            | 1 (0.7)            |
| Current smoker                                                            | 18 (10.6)          | 20 (11.6)          | 18 (12.4)          | 16 (11.0)          |
| Former smoker                                                             | 49 (28.8)          | 53 (30.6)          | 48 (33.1)          | 46 (31.7)          |
| Alcohol abuse                                                             | 5 (2.9)            | 3 (1.7)            | 1 (0.7)            | 2 (1.4)            |
| Chronic medications (taken within 3 weeks prior to enrollment), no. (%)   |                    |                    |                    |                    |
| Antiplatelet medication                                                   | 30 (17.6)          | 16 (9.25)          | 19 (13.1)          | 17 (11.7)          |
| Anticoagulant medication                                                  | 40 (23.5)          | 42 (24.3)          | 28 (19.3)          | 34 (23.4)          |
| Renin-angiotensin blocking medication                                     | 25 (21.9)          | 25 (21.4)          | 12 (12.0)          | 11 (11.5)          |

| Characteristic                                                                                | TXA-127 Trial                  |                                | TRV-027 Trial                  |                                |
|-----------------------------------------------------------------------------------------------|--------------------------------|--------------------------------|--------------------------------|--------------------------------|
|                                                                                               | TXA-127<br>(n=170)             | Placebo<br>(n=173)             | TRV-027<br>(n=145)             | Placebo<br>(n=145)             |
| Antihypertensive medication other than renin-angiotensin blocking medication                  | 43 (38.1)                      | 40 (34.2)                      | 30 (30.0)                      | 29 (30.2)                      |
| Immunomodulator or biologic medication to treat autoimmune disease or cancer                  | 34 (20.0)                      | 35 (20.2)                      | 29 (20.0)                      | 26 (17.9)                      |
| Acute outpatient medications for COVID-19 (taken within 3 weeks prior to enrollment), no. (%) |                                |                                |                                |                                |
| Small molecule antiviral medication                                                           | 29 (17.1)                      | 35 (20.2)                      | 22 (15.2)                      | 27 (18.6)                      |
| Anti-SARS-CoV-2 monoclonal antibody medication                                                | 10 (5.9)                       | 10 (5.8)                       | 6 (4.1)                        | 4 (2.8)                        |
| Vital signs closest to randomization, median (IQR)                                            |                                |                                |                                |                                |
| Temperature, °C                                                                               | 36.7<br>(36.4 - 37.0)<br>N=169 | 36.6<br>(36.4 - 36.9)<br>N=171 | 36.7<br>(36.4 - 36.9)<br>N=143 | 36.7<br>(36.4 - 36.9)<br>N=143 |
| Heart rate, beats/minute                                                                      | 78.5<br>(68.0 - 90.0)          | 81.0<br>(73.0 - 89.0)          | 79.0<br>(67.0 - 90.0)          | 80.0<br>(71.0 - 88.0)          |
| Systolic blood pressure, mm HG                                                                | 126<br>(114 - 140)             | 125<br>(114 - 138)             | 121<br>(110 - 134)             | 124<br>(114 - 138)             |
| Diastolic blood pressure, mm HG                                                               | 75.0 (68 - 82)                 | 74 (67 - 82)                   | 73 (67 - 82)                   | 74 (66 - 82)                   |
| Respiratory rate                                                                              | 20 (18 - 25)<br>N=169          | 21 (18 - 24)                   | 20 (18 - 24)<br>N=139          | 21 (18 - 24)                   |
| FiO2*                                                                                         | 0.44<br>(0.32 - 0.75)<br>N=169 | 0.40<br>(0.32 - 0.65)<br>N=172 | 0.44<br>(0.32 - 0.80)          | 0.40<br>(0.32 - 0.65)<br>N=144 |
| PaO2: FiO2 ratio**                                                                            | 163<br>(95 - 225)<br>N=168     | 183<br>(102 - 246)<br>N=171    | 155<br>(96 - 228)              | 183<br>(111 - 246)<br>N=143    |
| Glasgow coma scale <15, no. (%)                                                               | 25 (14.8)                      | 12 (6.94)                      | 19 (13.1)                      | 10 (6.90)                      |
| Laboratory measurements closest to randomization, median (IQR)                                |                                |                                |                                |                                |
| White blood cell count, thousand cells/ml                                                     | 6.7<br>(4.8 - 9.6)<br>N=155    | 6.9<br>(4.8 - 9.7)<br>N=160    | 7.1<br>(5.1 - 10.6)<br>N=136   | 7.0<br>(4.9 - 10.1)<br>N=136   |
| Platelet count, thousand/ml                                                                   | 228<br>(156 - 312)<br>N=155    | 231<br>(161 - 284)<br>N=160    | 208<br>(169 - 282)<br>N=136    | 230<br>(165 - 287)<br>N=135    |
| Hemoglobin, g/dL                                                                              | 13.2<br>(12.1 - 14.6)<br>N=154 | 13.2<br>(12.0 - 14.5)<br>N=160 | 13.4<br>(11.9 - 14.6)<br>N=137 | 13.2<br>(12.1 - 14.5)<br>N=136 |
| Serum sodium, mmol/L                                                                          | 138<br>(135 - 139)<br>N=164    | 137<br>(135 - 139)<br>N=168    | 138<br>(135 - 140)<br>N=144    | 137<br>(135 - 139)<br>N=143    |
| Serum potassium, mmol/L                                                                       | 4.2<br>(3.9 - 4.4)<br>N=164    | 4.2<br>(3.8 - 4.6)<br>N=165    | 4.1<br>(3.8 - 4.5)<br>N=142    | 4.2<br>(3.8 - 4.5)<br>N=140    |
| Serum creatinine, mmol/L                                                                      | 0.8 (0.7 - 1.1)<br>N=164       | 0.8 (0.7-1.0)<br>N=168         | 0.9 (0.7 - 1.1)<br>N=144       | 0.8 (0.7 - 1.0)<br>N=143       |



| Characteristic                              | TXA-127 Trial               |                             | TRV-027 Trial               |                             |
|---------------------------------------------|-----------------------------|-----------------------------|-----------------------------|-----------------------------|
|                                             | TXA-127<br>(n=170)<br>N=128 | Placebo<br>(n=173)<br>N=138 | TRV-027<br>(n=145)<br>N=114 | Placebo<br>(n=145)<br>N=116 |
| Serum aspartate aminotransferase (AST), U/L | 45 (33 - 66)<br>N=128       | 38 (25 - 52)<br>N=138       | 53 (33 - 82)<br>N=114       | 37 (25 - 52)<br>N=116       |
| Serum alanine aminotransferase (ALT), U/L   | 33 (18 - 53)<br>N=129       | 31 (18 - 51)<br>N=140       | 38 (22 - 70)<br>N=115       | 31 (18 - 52)<br>N=118       |
| Serum total bilirubin, mg/dL                | 0.5<br>(0.4 - 0.7)<br>N=131 | 0.5<br>(0.4 - 0.6)<br>N=140 | 0.5<br>(0.3 - 0.7)<br>N=117 | 0.4<br>(0.4 - 0.6)<br>N=119 |

**Abbreviations:**

no.: number; IQR: interquartile range; ICU: intensive care unit; COVID-19: coronavirus disease 2019; SARS-CoV-2: severe acute respiratory syndrome coronavirus 2; C: Celsius

**Footnotes:**

\*FiO2 was recorded directly from a respiratory support device if available. If not available, room air was recorded at 0.21 and for patients on supplemental oxygen, FiO2 was estimated based on supplemental oxygen flow rate.

\*\* PaO2 was recorded directly from an arterial blood gas analysis if available. If not available, PaO2 was estimated from SpO2.

**eTable 8.** Usual care in-hospital medications before randomization

Receipt of COVID-19 medications and renin angiotensin system (RAS) medications (any number of doses) in the hospital before trial randomization.

**(a) TXA-127 trial**

| <b>TXA-127 trial: in-hospital pre-randomization medications no. (%)</b> |                            |                            |
|-------------------------------------------------------------------------|----------------------------|----------------------------|
| <b>Medication</b>                                                       | <b>TXA-127<br/>(n=170)</b> | <b>Placebo<br/>(n=173)</b> |
| Angiotensin converting enzyme (ACE) inhibitor                           | 7 (4.1)                    | 9 (5.2)                    |
| Angiotensin receptor blocker (ARB)                                      | 11 (6.5)                   | 11 (6.4)                   |
| Beta-blockers                                                           | 22 (12.9)                  | 33 (19.1)                  |
| Antibiotics (systemic anti-bacterial medication)                        | 43 (25.3)                  | 37 (21.4)                  |
| Remdesivir                                                              | 120 (70.6)                 | 121 (69.9)                 |
| Anti-SARS-CoV-2 monoclonal antibody                                     | 0 (0.0)                    | 1 (0.58)                   |
| COVID-19 convalescent plasma                                            | 0 (0.0)                    | 0 (0.0)                    |
| Corticosteroids                                                         | 149 (87.6)                 | 136 (78.6)                 |
| Baricitinib                                                             | 25 (14.7)                  | 22 (12.7)                  |
| Tocilizumab                                                             | 0 (0.0)                    | 1 (0.6)                    |
| Other immunomodulator for COVID-19 treatment                            | 3 (1.8)                    | 1 (0.6)                    |

**(b) TRV-027 trial**

| <b>TRV-027 trial: in-hospital pre-randomization medications no. (%)</b> |                            |                            |
|-------------------------------------------------------------------------|----------------------------|----------------------------|
| <b>Medication</b>                                                       | <b>TRV-027<br/>(n=145)</b> | <b>Placebo<br/>(n=145)</b> |
| Angiotensin converting enzyme (ACE) inhibitor                           | 7 (4.8)                    | 9 (6.2)                    |
| Angiotensin receptor blocker (ARB) [exclusion criterion]                | 0 (0.0)                    | 0 (0.0)                    |
| Beta-blockers                                                           | 10 (6.9)                   | 24 (16.6)                  |
| Antibiotics (systemic anti-bacterial medication)                        | 28 (19.3)                  | 29 (20.0)                  |
| Remdesivir                                                              | 95 (65.5)                  | 95 (65.5)                  |
| Anti-SARS-CoV-2 monoclonal antibody                                     | 0 (0.0)                    | 1 (0.7)                    |
| COVID-19 convalescent plasma                                            | 0 (0.0)                    | 0 (0.0)                    |
| Corticosteroids                                                         | 113 (77.9)                 | 112 (77.2)                 |
| Baricitinib                                                             | 22 (15.2)                  | 18 (12.4)                  |
| Tocilizumab                                                             | 0 (0.0)                    | 1 (0.7)                    |
| Other immunomodulator for COVID-19 treatment                            | 4 (2.8)                    | 0 (0.0)                    |

**eTable 9.** Study drug delivery in the TXA-127 trial

The TXA-127 study drug was scheduled to be dosed as 0.5 mg/kg intravenous over approximately 3 hours once daily for 5 days or until hospital discharge, whichever occurred first. To facilitate comparisons of study drug delivery, the table below shows patients in the modified intention-to-treat population who were randomized to the active TXA-127 agent and those randomized to the placebo mimic of the TXA-127 agent. The active TXA-127 group displayed in this table is the same group used in efficacy analyses. However, the placebo group presented in this table is not the same placebo group used in efficacy evaluations because some of the placebo patients in efficacy analyses in the TXA-127 trial received a placebo mimic of TRV-027 or fostamatinib, which used a different dosing schedule.

|                                                                                         | <b>TXA-127 Active Group</b> | <b>Mimic TXA-127 Placebo Group</b> |
|-----------------------------------------------------------------------------------------|-----------------------------|------------------------------------|
| All patients                                                                            |                             |                                    |
| Patient sample size, no.                                                                | 170                         | 92                                 |
| Number of complete study drug doses delivered, no. (%)                                  |                             |                                    |
| 5 study drug doses                                                                      | 107 (62.9)                  | 57 (62.0)                          |
| 4 study drug doses                                                                      | 24 (14.1)                   | 12 (13.0)                          |
| 3 study drug doses                                                                      | 19 (11.2)                   | 11 (12.0)                          |
| 2 study drug doses                                                                      | 12 (7.1)                    | 4 (4.3)                            |
| 1 study drug doses                                                                      | 8 (4.7)                     | 8 (8.7)                            |
| Patients alive and hospitalized $\geq$ 5 days (available for all 5 doses of study drug) |                             |                                    |
| Patient sample size, no.                                                                | 121                         | 62                                 |
| Number of complete study drug doses delivered, no. (%)                                  |                             |                                    |
| 5 study drug doses                                                                      | 107 (88.4)                  | 57 (91.9)                          |
| 4 study drug doses                                                                      | 10 (8.3)                    | 3 (4.8)                            |
| 3 study drug doses                                                                      | 2 (1.7)                     | 1 (1.6)                            |
| 2 study drug doses                                                                      | 0 (0.0)                     | 1 (1.6)                            |
| 1 study drug doses                                                                      | 2 (1.7)                     | 0 (0.0)                            |

**eTable 10.** Study drug delivery in the TRV-027 trial

The TRV-027 study drug was scheduled to be dosed as a continuous intravenous infusion at 12 mg/hour for 5 days (120 hours) or until hospital discharge, whichever occurred first. To facilitate comparisons of study drug delivery, the table below shows patients in the modified intention-to-treat population who were randomized to the active TRV-027 agent and to the placebo mimic of the TRV-027 agent. The active TRV-027 group displayed in this table is the same group used in efficacy analyses. However, the placebo group presented in this table is not the same placebo group used in efficacy evaluations because some of the placebo patients in efficacy analyses in the TRV-027 trial received a placebo mimic of TXA-127 or fostamatinib, which used a different dosing schedule.

|                                                                                                          | <b>TRV-027 Active Group</b> | <b>Mimic TRV-027 Placebo Group</b> |
|----------------------------------------------------------------------------------------------------------|-----------------------------|------------------------------------|
| All patients                                                                                             |                             |                                    |
| Patient sample size, no.                                                                                 | 145                         | 79                                 |
| Full dose of study drug received (12mg/hr for 120 hours = 1440 mg), no. (%)                              | 93 (64.1)                   | 51 (64.6)                          |
| Patients who did not receive a full dose of 120 hours of study drug delivery                             |                             |                                    |
| Patient sample size, no.                                                                                 | 52                          | 28                                 |
| Reasons that full dose was not administered, no. (%)                                                     |                             |                                    |
| Hospital discharge/death                                                                                 | 21 (40.4)                   | 19 (67.9)                          |
| Adverse event                                                                                            | 14 (25.0)                   | 1 (3.6)                            |
| Other clinical event                                                                                     | 7 (13.5)                    | 6 (21.4)                           |
| Logistical barrier                                                                                       | 10 (19.2)                   | 2 (7.1)                            |
| Total dose administered (mg) among participants who did not receive the full dose (1440mg), median (IQR) | 575.6 (261.7 - 953.0)       | 814.0 (473.0 - 1089.0)             |

**eTable 11.** Summaries of oxygen-free days for subgroup analyses in TXA-127 trial

These summaries of oxygen-free days do not include patients with partially observed data (patients for whom the number of oxygen-free days was not known precisely but was known to be within a certain range).

| Subgroup                                | Sample sizes |            |                       | Oxygen-free days   |                    |                                                      |
|-----------------------------------------|--------------|------------|-----------------------|--------------------|--------------------|------------------------------------------------------|
|                                         | TXA-127, n   | Placebo, n | Partially observed, n | TXA-127, mean (SD) | Placebo, mean (SD) | Unadjusted absolute difference (95% CI) <sup>1</sup> |
| Age group, years                        |              |            |                       |                    |                    |                                                      |
| 18-30                                   | 9            | 7          | 2                     | 8 (12.1)           | 16.3 (11.2)        | -8.3 (-19.7, 3.2)                                    |
| 31-64                                   | 95           | 107        | 24                    | 9.8 (11.1)         | 11.5 (11.6)        | -1.7 (-4.8, 1.4)                                     |
| 65+                                     | 49           | 41         | 9                     | 7.8 (10.3)         | 10.1 (11.4)        | -2.3 (-6.8, 2.2)                                     |
| Sex                                     |              |            |                       |                    |                    |                                                      |
| Female                                  | 60           | 72         | 11                    | 9.6 (11.1)         | 12.1 (11.7)        | -2.5 (-6.4, 1.4)                                     |
| Male                                    | 93           | 83         | 24                    | 8.7 (10.8)         | 10.7 (11.4)        | -2.0 (-5.3, 1.3)                                     |
| WHO ordinal scale level                 |              |            |                       |                    |                    |                                                      |
| 4: Standard supplemental O <sub>2</sub> | 90           | 104        | 24                    | 12.4 (11.4)        | 14.3 (11.4)        | -1.9 (-5.1, 1.3)                                     |
| 5: HFNC or NIV                          | 47           | 43         | 10                    | 4.7 (8.5)          | 5.9 (9.6)          | -1.2 (-5, 2.6)                                       |
| 6/7: Invasive mechanical ventilation    | 16           | 8          | 1                     | 2.7 (6.9)          | 2.1 (7.6)          | 0.6 (-5.6, 6.9)                                      |
| COVID-19 vaccination status             |              |            |                       |                    |                    |                                                      |
| Unvaccinated                            | 96           | 102        | 18                    | 8.8 (10.6)         | 10.6 (11.3)        | -1.8 (-4.9, 1.3)                                     |
| At least 1 vaccine dose                 | 46           | 48         | 16                    | 9.4 (11.4)         | 12.9 (12.2)        | -3.5 (-8.3, 1.3)                                     |
| Pre-COVID-19 ACE inhibitor or ARB use   |              |            |                       |                    |                    |                                                      |
| No                                      | 111          | 109        | 26                    | 9.5 (10.9)         | 11.3 (11.5)        | -1.8 (-4.8, 1.2)                                     |
| Yes                                     | 40           | 44         | 9                     | 7.6 (11.1)         | 11.3 (11.7)        | -3.7 (-8.6, 1.2)                                     |

**Footnote:**

1. Unadjusted absolute differences and 95% credible intervals (CI) for oxygen-free days were calculated using the normal distribution with flat prior for both the mean and variance, excluding partially observed values.

**Abbreviations:**

WHO: World Health Organization; COVID-19: coronavirus disease 2019; SD: standard deviation; O<sub>2</sub>: oxygen; HFNC: high flow nasal cannula; NIV: non-invasive ventilation; ACE: angiotensin converting enzyme; ARB: angiotensin receptor blocker

**eTable 12.** Summaries of oxygen-free days for subgroup analyses in TRV-027 trial

These summaries of oxygen-free days do not include patients with partially observed data (patients for whom the number of oxygen-free days was not known precisely but was known to be within a certain range).

| Subgroup                                | Samples Sizes |            |                       | Oxygen-free days   |                    |                                                      |
|-----------------------------------------|---------------|------------|-----------------------|--------------------|--------------------|------------------------------------------------------|
|                                         | TRV-027, n    | Placebo, n | Partially observed, n | TRV-027, mean (SD) | Placebo, mean (SD) | Unadjusted absolute difference (95% CI) <sup>1</sup> |
| Age group, years                        |               |            |                       |                    |                    |                                                      |
| 18-30                                   | 5             | 7          | 0                     | 16.6 (10.3)        | 16.3 (11.2)        | 0.3 (-12, 12.6)                                      |
| 31-64                                   | 91            | 90         | 18                    | 8.7 (11)           | 10.6 (11.7)        | -1.9 (-5.2, 1.4)                                     |
| 65+                                     | 39            | 34         | 6                     | 5.5 (9.8)          | 9.1 (11)           | -3.6 (-8.4, 1.2)                                     |
| Sex                                     |               |            |                       |                    |                    |                                                      |
| Female                                  | 51            | 66         | 5                     | 6.6 (10.4)         | 10.7 (11.8)        | -4.1 (-8.1, -0.1)                                    |
| Male                                    | 84            | 65         | 19                    | 8.9 (11)           | 10.3 (11.3)        | -1.4 (-5, 2.2)                                       |
| WHO ordinal scale level                 |               |            |                       |                    |                    |                                                      |
| 4: Standard supplemental O <sub>2</sub> | 74            | 88         | 20                    | 11.7 (11.5)        | 13.4 (11.5)        | -1.7 (-5.3, 1.9)                                     |
| 5: HFNC or NIV                          | 48            | 37         | 3                     | 3.9 (8.5)          | 5.4 (9.6)          | -1.5 (-5.4, 2.4)                                     |
| 6/7: Invasive mechanical ventilation    | 13            | 6          | 1                     | 2.3 (5.5)          | -0.5 (0.5)         | 2.8 (-0.2, 5.8)                                      |
| COVID-19 vaccination status             |               |            |                       |                    |                    |                                                      |
| Unvaccinated                            | 90            | 85         | 15                    | 6.4 (10)           | 10.1 (11.4)        | -3.7 (-6.9, -0.5)                                    |
| At least 1 vaccine dose                 | 39            | 42         | 9                     | 10.5 (11.7)        | 11.3 (11.9)        | -0.8 (-5.9, 4.4)                                     |
| Pre-COVID-19 ACE inhibitor or ARB use   |               |            |                       |                    |                    |                                                      |
| No                                      | 108           | 104        | 19                    | 7.5 (10.5)         | 10.4 (11.4)        | -2.9 (-5.9, 0.1)                                     |
| Yes                                     | 26            | 26         | 5                     | 10.7 (12)          | 11.2 (12.2)        | -0.5 (-7.1, 6.1)                                     |

**Footnote:**

1. Unadjusted absolute differences and 95% credible intervals (CI) for oxygen-free days were calculated using the normal distribution with flat prior for both the mean and variance, excluding partially observed values.

**Abbreviations:**

WHO: World Health Organization; COVID-19: coronavirus disease 2019; SD: standard deviation; O<sub>2</sub>: oxygen; HFNC: high flow nasal cannula; NIV: non-invasive ventilation; ACE: angiotensin converting enzyme; ARB: angiotensin receptor blocker

**eTable 13.** Additional outcome results in TXA-127 trial

Secondary efficacy and safety outcomes in TXA-127 trial not presented in Table 2.

| <b>Outcome</b>                                                           | <b>TXA-127<br/>(n=170)</b>                                                                                                               | <b>Placebo<br/>(n=173)</b>                                                                                                             | <b>Odds Ratio*<br/>(95% CI)</b> |
|--------------------------------------------------------------------------|------------------------------------------------------------------------------------------------------------------------------------------|----------------------------------------------------------------------------------------------------------------------------------------|---------------------------------|
| <b><i>Secondary efficacy outcomes</i></b>                                |                                                                                                                                          |                                                                                                                                        |                                 |
| Alive and oxygen free at 14 days, no. (%)                                | 60 (38.0)<br>[n=158]                                                                                                                     | 86 (52.4)<br>[n=164]                                                                                                                   | 0.61 (0.38, 0.98)               |
| Alive and oxygen free at 28 days, no. (%)                                | 78 (50.3)<br>[n=155]                                                                                                                     | 87 (55.1)<br>[n=158]                                                                                                                   | 0.94 (0.58, 1.51)               |
| Alive and respiratory failure free at 14 days, no. (%)                   | 123 (77.4)<br>[n=159]                                                                                                                    | 126 (75.9)<br>[n=166]                                                                                                                  | 1.46 (0.82, 2.6)                |
| Alive and free of new invasive mechanical ventilation at day 14, no. (%) | 129 (81.1)<br>[n=159]                                                                                                                    | 133 (80.1)<br>[n=166]                                                                                                                  | 1.43 (0.77, 2.64)               |
| Alive and free of new invasive mechanical ventilation at day 28, no. (%) | 124 (80.0)<br>[n=155]                                                                                                                    | 128 (80.0)<br>[n=160]                                                                                                                  | 1.3 (0.70, 2.42)                |
| In-hospital mortality, no. (%)                                           | 23 (13.8)<br>[n=167]                                                                                                                     | 24 (14.0)<br>[n=172]                                                                                                                   | 0.78 (0.40, 1.55)               |
| 60-day mortality, no. (%)                                                | 26 (16.1)<br>[n=161]                                                                                                                     | 29 (17.5)<br>[n=166]                                                                                                                   | 0.71 (0.38, 1.35)               |
| 90-day mortality, no. (%)                                                | 28 (17.7)<br>[n=158]                                                                                                                     | 31 (19.3)<br>[n=161]                                                                                                                   | 0.71 (0.38, 1.32)               |
| WHO COVID-19 clinical progression ordinal scale level at day 14, no. (%) | 1: 37 (23.4)<br>2: 61 (38.6)<br>3: 5 (3.16)<br>4: 19 (12.0)<br>5: 6 (3.80)<br>6: 6 (3.80)<br>7: 12 (7.59)<br>8: 12 (7.59)<br>Missing: 12 | 1: 57 (34.8)<br>2: 55 (33.5)<br>3: 5 (3.05)<br>4: 7 (4.27)<br>5: 7 (4.27)<br>6: 6 (3.66)<br>7: 14 (8.54)<br>8: 13 (7.93)<br>Missing: 9 | 1.12 (0.75, 1.67)               |
| WHO COVID-19 clinical progression ordinal scale level at day 60, no. (%) | 1: 62 (48.4)<br>2: 35 (27.3)<br>3: 0 (0)<br>4: 2 (1.56)<br>5: 1 (0.78)<br>6: 2 (1.56)<br>7: 0 (0)<br>8: 26 (20.3)<br>Missing: 42         | 1: 63 (45.0)<br>2: 40 (28.6)<br>3: 2 (1.43)<br>4: 3 (2.14)<br>5: 0 (0)<br>6: 0 (0)<br>7: 3 (2.14)<br>8: 29 (20.7)<br>Missing: 33       | 0.68 (0.43, 1.07)               |
| Hospital-free days through day 28, mean (sd), [median (IQR)]             | 14.2 (10.5)<br>[18.0 (0.0 - 23.0)]<br>n=154                                                                                              | 15.6 (10.5)<br>[21.0 (1.8 - 24.0)]<br>n=160                                                                                            | 0.91 (0.61, 1.33)               |
| Respiratory-failure-free days through day 28, mean (sd), [median (IQR)]  | 19.5 (11.1)<br>[25.0 (15.0 - 28.0)]<br>n=150                                                                                             | 20.1 (11.4)<br>[28.0 (14.5 - 28.0)]<br>n=160                                                                                           | 1.01 (0.66, 1.57)               |
| Ventilator-free days through day 28, mean (sd), [median (IQR)]           | 21.8 (11.1)<br>[28.0 (21.5 - 28.0)]<br>n=150                                                                                             | 22.3 (10.9)<br>[28.0 (28.0 - 28.0)]<br>n=159                                                                                           | 1.31 (0.75, 2.30)               |
| <b><i>Safety Outcomes</i></b>                                            |                                                                                                                                          |                                                                                                                                        |                                 |
| Allergic reaction through day 28, no. (%)                                | 3 (0.0)                                                                                                                                  | 0 (0.0)                                                                                                                                | NE                              |
| New renal replacement therapy through day 7, no (%)                      | 11 (6.5)                                                                                                                                 | 12 (6.9)                                                                                                                               | 0.75 (0.31, 1.84)               |
| Hypotension through day 28, no. (%)                                      | 31 (18.2)                                                                                                                                | 31 (17.9)                                                                                                                              | 0.81 (0.45, 1.48)               |

**Abbreviations:**

CI: credible interval; no: number; IQR: interquartile range; WHO: World Health Organization; COVID-19: coronavirus disease 2019; SD: standard deviation; NE: not estimable

**Footnotes:**

\* See Table S3 for descriptions of how the odds ratios were calculated and the interpretation of the odds ratios.



**eTable 14.** Additional outcome results in TRV-027 trial

Secondary efficacy and safety outcomes in TRV-027 trial not presented in Table 2.

| <b>Outcome</b>                                                                | <b>TRV-027<br/>(n=145)</b>                                                                                                         | <b>Placebo<br/>(n=145)</b>                                                                                                        | <b>Odds Ratio*<br/>(95% CI)</b> |
|-------------------------------------------------------------------------------|------------------------------------------------------------------------------------------------------------------------------------|-----------------------------------------------------------------------------------------------------------------------------------|---------------------------------|
| <b><i>Secondary efficacy outcomes</i></b>                                     |                                                                                                                                    |                                                                                                                                   |                                 |
| Alive and oxygen free at 14 days, no. (%)                                     | 48 (34.8)<br>[n=138]                                                                                                               | 66 (48.2)<br>[n=137]                                                                                                              | 0.64 (0.38, 1.08)               |
| Alive and oxygen free at 28 days, no. (%)                                     | 60 (44.4%)<br>[n=135]                                                                                                              | 69 (51.5)<br>[n=134]                                                                                                              | 0.84 (0.50, 1.41)               |
| Alive and respiratory failure free at 14 days, no. (%)                        | 91 (65.9)<br>[n=138]                                                                                                               | 105 (75.0)<br>[n=140]                                                                                                             | 0.8 (0.43, 1.49)                |
| Alive and free of new invasive mechanical ventilation at day 14, no. (%)      | 98 (71.0)<br>[n=138]                                                                                                               | 111 (79.3)<br>[n=140]                                                                                                             | 0.8 (0.42, 1.52)                |
| Alive and free of new invasive mechanical ventilation at day 28, no. (%)      | 99 (72.8)<br>[n=136]                                                                                                               | 109 (80.1)<br>[n=136]                                                                                                             | 0.85 (0.45, 1.61)               |
| In-hospital mortality, no. (%)                                                | 31 (21.4)<br>[n=145]                                                                                                               | 20 (13.9)<br>[n=144]                                                                                                              | 1.49 (0.75, 2.96)               |
| 60-day mortality, no. (%)                                                     | 33 (23.7)<br>[n=139]                                                                                                               | 23 (16.4)<br>[n=140]                                                                                                              | 1.36 (0.71, 2.62)               |
| 90-day mortality, no. (%)                                                     | 34 (25.2)<br>[n=135]                                                                                                               | 25 (18.1)<br>[n=138]                                                                                                              | 1.31 (0.69, 2.5)                |
| WHO COVID-19 clinical progression ordinal scale level at day 14, median (IQR) | 1: 31 (22.5)<br>2: 50 (36.2)<br>3: 2 (1.5)<br>4: 8 (5.8)<br>5: 7 (5.1)<br>6: 5 (3.6)<br>7: 14 (10.1)<br>8: 21 (15.2)<br>Missing: 7 | 1: 45 (32.8)<br>2: 48 (35.0)<br>3: 3 (2.2)<br>4: 6 (4.4)<br>5: 6 (4.4)<br>6: 4 (2.9)<br>7: 14 (10.2)<br>8: 11 (8.0)<br>Missing: 8 | 1.42 (0.91, 2.19)               |
| WHO COVID-19 clinical progression ordinal scale level at day 60, median (IQR) | 1: 44 (40.7)<br>2: 25 (23.1)<br>3: 0 (0)<br>4: 2 (1.85)<br>5: 2 (1.85)<br>6: 0 (0)<br>7: 2 (1.85)<br>8: 33 (30.6)<br>Missing: 37   | 1: 50 (43.5)<br>2: 32 (27.8)<br>3: 3 (2.61)<br>4: 4 (3.48)<br>5: 0 (0)<br>6: 0 (0)<br>7: 3 (2.61)<br>8: 23 (20.0)<br>Missing: 30  | 1.03 (0.63, 1.67)               |
| Hospital-free days through day 28, mean (SD) [median (IQR)]                   | 13.5 (10.8)<br>[18.0 (0.0 - 23.0)]<br>n=136                                                                                        | 15.4 (10.6)<br>[21.0 (0.8 - 24.0)]<br>n=136                                                                                       | 0.80 (0.52, 1.21)               |
| Respiratory-failure-free days through day 28, mean (SD) [median (IQR)]        | 17.4 (12.8)<br>[26.0 (0.0 - 28.0)]<br>n=135                                                                                        | 20.0 (11.5)<br>[28.0 (12.0 - 28.0)]<br>n=136                                                                                      | 0.91 (0.56, 1.47)               |
| Ventilator-free days through day 28, mean (SD) [median (IQR)]                 | 19.5 (12.5)<br>[28.0 (3.5 - 28.0)]<br>n=135                                                                                        | 22.4 (10.9)<br>[28.0 (28.0 - 28.0)]<br>n=135                                                                                      | 0.76 (0.43, 1.38)               |
| <b><i>Safety Outcomes</i></b>                                                 |                                                                                                                                    |                                                                                                                                   |                                 |
| Allergic reaction through day 28, no. (%)                                     | 0 (0.0)                                                                                                                            | 3 (2.1)                                                                                                                           | NE                              |
| New renal replacement therapy through day 28, no (%)                          | 9 (6.2)                                                                                                                            | 11 (7.6)                                                                                                                          | 0.59 (0.22, 1.55)               |
| Hypotension through day 28, no. (%)                                           | 32 (22.1)                                                                                                                          | 25 (17.2)                                                                                                                         | 1.07 (0.55, 2.08)               |

**Abbreviations:**

CI: credible interval; no: number; IQR: interquartile range; WHO: World Health Organization; COVID-19: coronavirus disease 2019; NE: not estimable

**Footnotes:**

\* See Table S3 for descriptions of how the odds ratios were calculated and the interpretation of the odds ratios.

**eTable 15.** PSESEs results in TXA-127 trial

PSESE = protocol-specified exempt serious events, which were systematically collected events captured through day 60

| <b>PSESE, no. (%)</b>                                      | <b>TXA-127<br/>(n=170)</b> | <b>Placebo<br/>(n=173)</b> |
|------------------------------------------------------------|----------------------------|----------------------------|
| Seizure                                                    | 1 (0.59)                   | 1 (0.58)                   |
| Stroke                                                     | 5 (2.94)                   | 0 (0)                      |
| Arrhythmia (atrial or ventricular)                         | 16 (9.41)                  | 9 (5.20)                   |
| Cardiomyopathy                                             | 0 (0)                      | 0 (0)                      |
| Cardiac arrest                                             | 6 (3.53)                   | 6 (3.47)                   |
| Myocardial injury                                          | 1 (0.59)                   | 3 (1.73)                   |
| Acute coronary syndrome                                    | 0 (0)                      | 0 (0)                      |
| Hypertension                                               | 0 (0)                      | 0 (0)                      |
| Hypotension                                                | 31 (18.2)                  | 31 (17.9)                  |
| Hypoxemia requiring supplemental oxygen                    | 8 (4.71)                   | 8 (4.62)                   |
| Acute respiratory distress syndrome                        | 15 (8.82)                  | 20 (11.6)                  |
| Receipt of non-invasive ventilation                        | 26 (15.3)                  | 27 (15.6)                  |
| Receipt of invasive ventilation                            | 39 (22.9)                  | 38 (22.0)                  |
| Receipt of extracorporeal membrane oxygenation (ECMO)      | 2 (1.18)                   | 3 (1.73)                   |
| Elevation of aspartate aminotransferase (AST)              | 0 (0)                      | 5 (2.89)                   |
| Elevation of alanine aminotransferase (ALT)                | 5 (2.94)                   | 5 (2.89)                   |
| Acute pancreatitis                                         | 0 (0)                      | 1 (0.58)                   |
| Acute kidney injury                                        | 1 (0.59)                   | 3 (1.73)                   |
| Receipt of renal replacement therapy (through day 28 only) | 11 (6.47)                  | 12 (6.94)                  |
| Symptomatic hypoglycemia                                   | 1 (0.59)                   | 0 (0)                      |
| Neutropenia                                                | 0 (0)                      | 1 (0.58)                   |
| Lymphopenia                                                | 2 (1.18)                   | 2 (1.16)                   |
| Anemia                                                     | 1 (0.59)                   | 3 (1.73)                   |
| Thrombocytopenia                                           | 0 (0)                      | 2 (1.16)                   |
| Venous thromboembolism                                     | 13 (7.65)                  | 13 (7.51)                  |
| Severe dermatologic reaction                               | 0 (0)                      | 0 (0)                      |

**eTable 16.** PSESEs results in TRV-027 trial

PSESE = protocol-specified exempt serious events, which were systematically collected events captured through day 60

| <b>PSESE, no. (%)</b>                                      | <b>TRV-027<br/>(n=145)</b> | <b>Placebo<br/>(n=145)</b> |
|------------------------------------------------------------|----------------------------|----------------------------|
| Seizure                                                    | 2 (1.38)                   | 1 (0.69)                   |
| Stroke                                                     | 0 (0)                      | 0 (0)                      |
| Arrhythmia (atrial or ventricular)                         | 8 (5.52)                   | 6 (4.14)                   |
| Cardiomyopathy                                             | 1 (0.69)                   | 0 (0)                      |
| Cardiac arrest                                             | 7 (4.83)                   | 5 (3.45)                   |
| Myocardial injury                                          | 0 (0)                      | 2 (1.38)                   |
| Acute coronary syndrome                                    | 0 (0)                      | 0 (0)                      |
| Hypertension                                               | 0 (0)                      | 0 (0)                      |
| Hypotension                                                | 32 (22.1)                  | 25 (17.2)                  |
| Hypoxemia requiring supplemental oxygen                    | 4 (2.76)                   | 8 (5.52)                   |
| Acute respiratory distress syndrome                        | 14 (9.66)                  | 16 (11.0)                  |
| Receipt of non-invasive ventilation                        | 24 (16.6)                  | 21 (14.5)                  |
| Receipt of invasive ventilation                            | 38 (26.2)                  | 31 (21.4)                  |
| Receipt of extracorporeal membrane oxygenation (ECMO)      | 3 (2.07)                   | 3 (2.07)                   |
| Elevation of aspartate aminotransferase (AST)              | 5 (3.45)                   | 5 (3.45)                   |
| Elevation of alanine aminotransferase (ALT)                | 7 (4.83)                   | 5 (3.45)                   |
| Acute pancreatitis                                         | 1 (0.69)                   | 1 (0.69)                   |
| Acute kidney injury                                        | 4 (2.76)                   | 3 (2.07)                   |
| Receipt of renal replacement therapy (through day 28 only) | 9 (6.21)                   | 11 (7.59)                  |
| Symptomatic hypoglycemia                                   | 1 (0.69)                   | 0 (0)                      |
| Neutropenia                                                | 0 (0)                      | 1 (0.69)                   |
| Lymphopenia                                                | 5 (3.45)                   | 2 (1.38)                   |
| Anemia                                                     | 4 (2.76)                   | 3 (2.07)                   |
| Thrombocytopenia                                           | 5 (3.45)                   | 3 (2.07)                   |
| Venous thromboembolism                                     | 5 (3.45)                   | 12 (8.28)                  |
| Severe dermatologic reaction                               | 0 (0)                      | 0 (0)                      |

**eTable 17.** Adverse events (AEs) in TXA-127 trial

The trial protocol instructed investigators to record adverse events (AEs) that met any of the following criteria: (1) serious and definitely or possibly related (regardless of PSESE status); (2) unexpected and definitely or possibly related (regardless of PSESE status); (3) serious and not a PSESE; (4) definitely or possibly related or of uncertain relationship and not a PSESE; (4) severity grade 3 or 4 clinical adverse event and not a PSESE.

A serious adverse event (SAE) was defined as an adverse event leading to death, a life-threatening experience, prolongation of inpatient hospitalization or re-hospitalization, or persistent or significant disability or incapacity.

Site investigators reported the suspected relatedness of each adverse event to study procedures using the following 5 options: definitely related; probably related; possibly related; probably not related; definitely not related; uncertain relationship.

In the TXA-127 active agent group, 41 total adverse events were reported. In the placebo group of the TXA-127 trial, 34 total adverse events were reported.

| <b>Patients with Adverse Events (AEs) in the TXA-127 trial intention-to-treat population.</b> |                            |                            |
|-----------------------------------------------------------------------------------------------|----------------------------|----------------------------|
|                                                                                               | <b>TXA-127<br/>(n=177)</b> | <b>Placebo<br/>(n=174)</b> |
| Grade 1: patients with $\geq 1$ grade 1 AE, no. (%)                                           | 4 (2.3)                    | 1 (0.6)                    |
| Grade 2: patients with $\geq 1$ grade 2 AE, no. (%)                                           | 5 (2.8)                    | 3 (1.7)                    |
| Grade 3: patients with $\geq 1$ grade 3 AE, no. (%)                                           | 13 (7.3)                   | 11 (6.3)                   |
| Grade 4: patients with $\geq 1$ grade 4 AE, no. (%)                                           | 3 (1.7)                    | 5 (2.9)                    |
| Grade 5: patients with $\geq 1$ grade 5 AE, no. (%)                                           | 3 (1.7)                    | 3 (1.7)                    |
| Serious AE: patients with $\geq 1$ SAE, no. (%)                                               | 7 (4.0)                    | 10 (5.7)                   |

**eTable 18.** Adverse events (AEs) in TRV-027 trial

The trial protocol instructed investigators to record adverse events (AEs) that met any of the following criteria: (1) serious and definitely or possibly related (regardless of PSESE status); (2) unexpected and definitely or possibly related (regardless of PSESE status); (3) serious and not a PSESE; (4) definitely or possibly related or of uncertain relationship and not a PSESE; (4) severity grade 3 or 4 clinical adverse event and not a PSESE.

A serious adverse event (SAE) was defined as an adverse event leading to death, a life-threatening experience, prolongation of inpatient hospitalization or re-hospitalization, or persistent or significant disability or incapacity.

Site investigators reported the suspected relatedness of each adverse event to study procedures using the following 5 options: definitely related; probably related; possibly related; probably not related; definitely not related; uncertain relationship.

In the TRV-027 active agent group, 30 total adverse events were reported. In the placebo group of the TRV-027 trial, 22 total adverse events were reported.

| <b>Patients with Adverse Events (AEs) in the TRV-027 trial intention-to-treat population.</b> |                            |                            |
|-----------------------------------------------------------------------------------------------|----------------------------|----------------------------|
|                                                                                               | <b>TRV-027<br/>(n=149)</b> | <b>Placebo<br/>(n=146)</b> |
| Grade 1: patients with $\geq 1$ grade 1 AE, no. (%)                                           | 2 (1.3)                    | 1 (0.7)                    |
| Grade 2: patients with $\geq 1$ grade 2 AE, no. (%)                                           | 1 (0.7)                    | 3 (2.1)                    |
| Grade 3: patients with $\geq 1$ grade 3 AE, no. (%)                                           | 7 (4.7)                    | 8 (5.5)                    |
| Grade 4: patients with $\geq 1$ grade 4 AE, no. (%)                                           | 11 (7.4)                   | 4 (2.7)                    |
| Grade 5: patients with $\geq 1$ grade 5 AE, no. (%)                                           | 5 (3.4)                    | 2 (1.4)                    |
| Serious AE: patients with $\geq 1$ SAE, no. (%)                                               | 12 (8.1)                   | 8 (5.5)                    |
