# Supplementary material
Source: PubMed Central journal article supplement (PMC10091180)
Supplement: jama-e233546-s002.pdf [file jama-e233546-s002.pdf]

1  
2  
3  
4 **CONNECTS Master Protocol for Clinical Trials targeting macro-, micro-immuno-**  
5 **thrombosis, vascular hyperinflammation, and hypercoagulability and renin-angiotensin-**  
6 **aldosterone system (RAAS) in hospitalized patients with COVID-19 (ACTIV-4 Host Tissue)**  
7  
8

9 **Short Title: Novel Experimental COVID Therapies Affecting Host Response (NECTAR)**

10  
11 **COVID-19 Inpatient Host Tissue Master Protocol**

12  
13 **ClinicalTrials.gov Number: NCT04924660**

14  
15 **Supported by: NHLBI-CONNECTS**

16  
17 **Version Number: 1.8**

18  
19 **2021.12.17**  
20

|                                                                 |                                                                                                                                                                                                                       |
|-----------------------------------------------------------------|-----------------------------------------------------------------------------------------------------------------------------------------------------------------------------------------------------------------------|
| <b>Study Chair</b>                                              | Sean P. Collins, MD, MSc<br>Email: <a href="mailto:sean.collins@vumc.org">sean.collins@vumc.org</a>                                                                                                                   |
| <b>Principal Investigator,<br/>Clinical Coordinating Center</b> | Wesley H. Self, MD, MPH<br>Email: <a href="mailto:wesley.self@vumc.org">wesley.self@vumc.org</a>                                                                                                                      |
| <b>Principal Investigator,<br/>Data Coordinating Center</b>     | Matthew S. Shotwell, PhD<br>Email: <a href="mailto:Matt.shotwell@vumc.org">Matt.shotwell@vumc.org</a>                                                                                                                 |
| <b>Trial Biostatisticians</b>                                   | Christopher J. Lindsell, PhD<br>Email: <a href="mailto:chris.lindsell@vumc.org">chris.lindsell@vumc.org</a><br><br>James Troendle, PhD<br>NHLBI<br><a href="mailto:James.troendle@nih.gov">James.troendle@nih.gov</a> |
| <b>Medical Monitor</b>                                          | Matthew Semler, MD, MSc<br>Email: <a href="mailto:matthew.w.semmler@vumc.org">matthew.w.semmler@vumc.org</a>                                                                                                          |
| <b>NHLBI Representative</b>                                     | Yves Rosenberg, MD<br>Email: <a href="mailto:rosenbey@nhlbi.nih.gov">rosenbey@nhlbi.nih.gov</a>                                                                                                                       |
| <b>IND</b>                                                      | 154000                                                                                                                                                                                                                |
| <b>ClinicalTrials.gov Identifier</b>                            | NCT04924660                                                                                                                                                                                                           |
| <b>sIRB study number</b>                                        | 210982                                                                                                                                                                                                                |

## 22 **Table of Contents**

|    |        |                                                                                        |
|----|--------|----------------------------------------------------------------------------------------|
| 23 |        |                                                                                        |
| 24 | 1      | List of Abbreviations ..... vi                                                         |
| 25 | 2      | Master Protocol Summary ..... 8                                                        |
| 26 | 3      | Introduction, Background Information and Scientific Rationale ..... 11                 |
| 27 | 3.1    | Background Information, Significance and Relevant Literature ..... 11                  |
| 28 | 3.2    | Relevance of host tissue pathway(s) to COVID-19 ..... 12                               |
| 29 | 3.3    | Rationale for evaluating host tissue therapies in a single platform among patients who |
| 30 |        | are hospitalized with COVID-19 ..... 12                                                |
| 31 | 3.4    | Potential Risks & Benefits ..... 13                                                    |
| 32 | 4      | Study Objectives and Purpose ..... 13                                                  |
| 33 | 4.1    | Study Objectives ..... 14                                                              |
| 34 | 4.2    | Study Hypothesis ..... 14                                                              |
| 35 | 5      | Study Design and Outcomes ..... 14                                                     |
| 36 | 5.1    | Overall Study Design ..... 14                                                          |
| 37 | 5.2    | Randomization ..... 14                                                                 |
| 38 | 5.3    | Study Outcomes ..... 14                                                                |
| 39 | 5.3.1  | Primary Study Outcome ..... 14                                                         |
| 40 | 5.3.2  | Secondary Outcomes ..... 15                                                            |
| 41 | 5.3.3  | Exploratory Outcomes ..... 16                                                          |
| 42 | 5.3.4  | Safety Outcomes (systematically collected during index hospitalization) ..... 16       |
| 43 | 6      | Study population and enrollment ..... 16                                               |
| 44 | 6.1    | Inclusion criteria ..... 16                                                            |
| 45 | 6.2    | Exclusion criteria ..... 17                                                            |
| 46 | 6.3    | Justification of exclusion criteria ..... 17                                           |
| 47 | 6.4    | Special screening procedures ..... 17                                                  |
| 48 | 6.5    | Assessment of eligibility and exclusion tracking ..... 18                              |
| 49 | 6.6    | Process of obtaining informed consent ..... 18                                         |
| 50 | 6.6.1  | Paper-based approach ..... 18                                                          |
| 51 | 6.6.2  | Electronic/e-consent approach ..... 19                                                 |
| 52 | 6.6.3  | Attestation of informed consent ..... 20                                               |
| 53 | 6.7    | Randomization and blinding ..... 20                                                    |
| 54 | 6.8    | Vulnerable Subjects ..... 21                                                           |
| 55 | 6.9    | Strategies for Recruitment and Retention ..... 21                                      |
| 56 | 6.10   | Duration of Study Participation ..... 21                                               |
| 57 | 6.11   | Participant Withdrawal or Termination ..... 22                                         |
| 58 | 6.11.1 | Reasons for Withdrawal or Termination ..... 22                                         |
| 59 | 6.11.2 | Premature Termination or Suspension ..... 22                                           |
| 60 | 7      | Study Procedures and Schedule ..... 22                                                 |
| 61 | 7.1    | Study interventions ..... 22                                                           |
| 62 | 7.2    | Expedited Critical and Major Event Reporting ..... 23                                  |
| 63 | 7.3    | Data and Safety Monitoring Plan ..... 23                                               |
| 64 | 7.4    | Biological specimens ..... 23                                                          |
| 65 | 7.5    | Shared placebo group dose, duration and route of administration ..... 23               |
| 66 | 7.6    | Co-Interventions and Co-enrollment ..... 23                                            |

|     |        |                                                                         |    |
|-----|--------|-------------------------------------------------------------------------|----|
| 67  | 7.7    | On study monitoring .....                                               | 24 |
| 68  | 7.7.1  | Laboratory evaluations .....                                            | 24 |
| 69  | 7.7.2  | Clinical evaluations.....                                               | 25 |
| 70  | 7.7.3  | Criteria for stopping drug.....                                         | 25 |
| 71  | 7.7.4  | Plan for drug shortages .....                                           | 25 |
| 72  | 7.7.5  | Baseline variable collection .....                                      | 25 |
| 73  | 7.7.6  | Assessments between hospital presentation and hospital discharge .....  | 26 |
| 74  | 7.7.7  | Assessments following hospital discharge .....                          | 27 |
| 75  | 8      | Statistical Considerations .....                                        | 29 |
| 76  | 8.1    | Statistical and Analytical Plans.....                                   | 29 |
| 77  | 8.2    | Analysis Datasets .....                                                 | 29 |
| 78  | 8.3    | Statistical Modeling.....                                               | 29 |
| 79  | 8.4    | Loss to Follow-up, Censoring, and Intercurrent Events.....              | 30 |
| 80  | 8.5    | Model Prior and Bayesian Computation .....                              | 30 |
| 81  | 8.6    | Analysis of Primary Outcome .....                                       | 30 |
| 82  | 8.6.1  | Primary Analysis.....                                                   | 30 |
| 83  | 8.6.2  | Planned Interim Analyses, Early Stopping, and Type-I Error Control..... | 31 |
| 84  | 8.6.3  | Supplementary Efficacy Estimands.....                                   | 32 |
| 85  | 8.6.4  | Sensitivity and Supplementary Analyses .....                            | 32 |
| 86  | 8.6.5  | Sample Size .....                                                       | 33 |
| 87  | 8.7    | Analysis of Secondary Outcomes.....                                     | 36 |
| 88  | 8.8    | Analysis of Safety Outcomes.....                                        | 36 |
| 89  | 8.9    | Adherence and Retention Analyses .....                                  | 37 |
| 90  | 8.10   | Baseline Descriptive Statistics.....                                    | 37 |
| 91  | 8.11   | Exploratory Analyses.....                                               | 37 |
| 92  | 9      | Measures to Minimize Bias.....                                          | 37 |
| 93  | 9.1    | Enrollment/Randomization/Blinding.....                                  | 37 |
| 94  | 10     | Source Documents and Access to Source Data/Documents .....              | 37 |
| 95  | 11     | Quality Assurance and Quality Control.....                              | 38 |
| 96  | 12     | Ethics/Protection of Human Subjects .....                               | 38 |
| 97  | 12.1   | Ethical Standard .....                                                  | 38 |
| 98  | 12.2   | IRB/Ethics Committee/Competent Authority.....                           | 38 |
| 99  | 12.3   | Posting of Clinical Trial Consent Form .....                            | 38 |
| 100 | 12.4   | Participant and Data Confidentiality .....                              | 38 |
| 101 | 12.5   | Certificate of Confidentiality.....                                     | 39 |
| 102 | 13     | Adverse events.....                                                     | 39 |
| 103 | 13.1   | Defining adverse events .....                                           | 40 |
| 104 | 13.2   | Protocol-specified exempt serious events (PSESEs).....                  | 42 |
| 105 | 13.3   | Monitoring and recording adverse events .....                           | 44 |
| 106 | 13.4   | Reporting adverse events.....                                           | 44 |
| 107 | 13.4.1 | Adverse Events that Qualify for Expedited Reporting .....               | 44 |
| 108 | 13.4.2 | Grade 3 and 4 Clinical Adverse Events.....                              | 45 |
| 109 | 13.4.3 | Pregnancy .....                                                         | 45 |
| 110 | 13.5   | Medical Monitor .....                                                   | 46 |

|     |        |                                                                                       |    |
|-----|--------|---------------------------------------------------------------------------------------|----|
| 111 | 14     | Risk Assessment .....                                                                 | 47 |
| 112 | 14.1   | Potential risks of other study procedures .....                                       | 47 |
| 113 | 14.2   | Minimization of risk .....                                                            | 47 |
| 114 | 14.3   | Potential benefit.....                                                                | 47 |
| 115 | 14.4   | Risk in relation to anticipated benefit.....                                          | 47 |
| 116 | 15     | Data and Safety Monitoring Board (DSMB).....                                          | 47 |
| 117 | 16     | Data Handling and Record Keeping .....                                                | 48 |
| 118 | 16.1   | Data Collection and Management Responsibilities .....                                 | 48 |
| 119 | 16.2   | Study Records Retention.....                                                          | 48 |
| 120 | 16.3   | Protocol Deviations.....                                                              | 48 |
| 121 | 16.4   | 21 CFR Part 11 Compliance.....                                                        | 49 |
| 122 | 16.4.1 | Record locking.....                                                                   | 49 |
| 123 | 16.4.2 | eConsent.....                                                                         | 49 |
| 124 | 17     | Study Finances .....                                                                  | 49 |
| 125 | 17.1   | Funding Source .....                                                                  | 49 |
| 126 | 17.2   | Costs to the Participant .....                                                        | 49 |
| 127 | 18     | Appendix A: Primary study outcomes.....                                               | 50 |
| 128 | 18.1   | Approach to ascertainment and verification of outcomes.....                           | 50 |
| 129 | 18.2   | Primary outcome: Oxygen free days .....                                               | 50 |
| 130 | 18.3   | Definitions.....                                                                      | 52 |
| 131 | 18.3.1 | ICU Level of care.....                                                                | 52 |
| 132 | 18.3.2 | Myocardial injury .....                                                               | 52 |
| 133 | 18.3.3 | Acute Kidney Injury .....                                                             | 52 |
| 134 | 18.3.4 | Disseminated Intravascular Coagulation (DIC) (Overt) – DIC score $\geq 5$ .....       | 52 |
| 135 | 18.3.5 | ISTH Defined Major Bleeding.....                                                      | 53 |
| 136 | 19     | Appendix B: Data and Safety Monitoring Plan.....                                      | 54 |
| 137 | 19.1   | Overview.....                                                                         | 54 |
| 138 | 20     | Appendix C: Minimum Biological Specimen collection .....                              | 55 |
| 139 | 21     | Appendix D: Arm 1: TXA127, Angiotensin-(1-7), (Ang1-7).....                           | 56 |
| 140 | 21.1   | Description of active therapy .....                                                   | 56 |
| 141 | 21.2   | Rationale for evaluating Ang(1-7).....                                                | 56 |
| 142 | 21.3   | TXA127/Ang (1-7) dose, duration, and route of administration .....                    | 56 |
| 143 | 21.4   | Placebo.....                                                                          | 57 |
| 144 | 21.5   | TXA127/Ang (1-7) -specific safety concerns and potential medication interactions..... | 57 |
| 145 | 22     | Appendix E: Arm 2: TRV027.....                                                        | 58 |
| 146 | 22.1   | Description of active therapy .....                                                   | 58 |
| 147 | 22.2   | Rationale for evaluating TRV027.....                                                  | 58 |
| 148 | 22.3   | TRV027 dose, duration, and route of administration .....                              | 58 |
| 149 | 22.4   | Placebo.....                                                                          | 58 |
| 150 | 22.5   | TRV027 therapy-specific safety concerns and potential medication interactions.....    | 58 |
| 151 | 23     | Appendix F: Arm 3: Fostamatinib .....                                                 | 60 |
| 152 | 23.1   | Description of active therapy .....                                                   | 60 |
| 153 | 23.2   | Rationale for evaluating Fostamatinib .....                                           | 60 |

|     |      |                                                                                        |    |
|-----|------|----------------------------------------------------------------------------------------|----|
| 154 | 23.3 | Fostamatinib dose, duration, and route of administration.....                          | 61 |
| 155 | 23.4 | Placebo.....                                                                           | 61 |
| 156 | 23.5 | Fostamatinib-specific safety considerations and potential medication interactions..... | 61 |
| 157 | 23.6 | Fostamatinib Arm-Specific Exclusion Criteria.....                                      | 62 |
| 158 | 23.7 | Dose Modification Considerations and Medication Interactions .....                     | 62 |
| 159 | 23.8 | Fostamatinib Arm Logistics .....                                                       | 67 |
| 160 | 24   | References .....                                                                       | 69 |
| 161 |      |                                                                                        |    |

|          |                                                         |
|----------|---------------------------------------------------------|
| AE       | Adverse Event/Adverse Experience                        |
| ARDS     | Acute Respiratory Distress Syndrome.                    |
| CFR      | Code of Federal Regulations                             |
| CHF      | Congestive Heart Failure                                |
| CrCl     | Creatinine Clearance                                    |
| COVID-19 | Coronavirus Disease                                     |
| CRF      | Case Report Form                                        |
| CSOC     | Clinical Study Oversight Committee                      |
| DCC      | Data Coordinating Center                                |
| DHHS     | Department of Health and Human Services                 |
| DIC      | Disseminated Intravascular Coagulation                  |
| DSMB     | Data and Safety Monitoring Board                        |
| ECMO     | Extracorporeal Membrane Oxygenation                     |
| eGFR     | Estimated Glomerular Filtration Rate                    |
| ESRD     | End-stage renal disease                                 |
| FDA      | Food and Drug Administration                            |
| FFR      | Federal Financial Report                                |
| FWA      | Federal Wide Assurance                                  |
| GCP      | Good Clinical Practice                                  |
| GI       | Gastrointestinal                                        |
| HFNO     | High-flow Nasal Oxygen ( $\geq 30\text{L}/\text{min}$ ) |
| HIPAA    | Health Insurance Portability and Accountability Act     |
| ICF      | Informed Consent Form                                   |
| ICH      | International Conference on Harmonization               |
| ICMJE    | International Committee of Medical Journal Editors      |
| IRB      | Institutional Review Board                              |
| ISM      | Independent Safety Monitor                              |
| ISTH     | International Society on Thrombosis and Hemostasis      |
| ITT      | Intent to Treat                                         |
| LAR      | Legally Authorized Representative                       |
| LOS      | Length of Stay                                          |
| MOP      | Manual of Procedures                                    |
| N        | Number (typically refers to participants)               |
| NETs     | Neutrophil extracellular traps                          |
| NIH      | National Institutes of Health                           |
| NIV      | Non-Invasive Ventilation                                |

|            |                                                   |
|------------|---------------------------------------------------|
| NYULH      | New York University Langone Health                |
| OFD        | Oxygen Free Days                                  |
| OHRP       | Office for Human Research Protections             |
| OHSR       | Office of Human Participants Research             |
| OSFD       | Organ Support Free Days                           |
| PI         | Principal Investigator                            |
| PRBC       | Packed Red Blood Cells                            |
| PSESEs     | Protocol-specified exempt serious events          |
| PTT        | Partial Thromboplastin Time                       |
| QA         | Quality Assurance                                 |
| QC         | Quality Control                                   |
| RRT        | Renal Replacement Therapy                         |
| SARS-CoV-2 | Severe Acute Respiratory Syndrome- Coronavirus- 2 |
| SAE        | Serious Adverse Event/Serious Adverse Experience  |
| SUSAR      | Suspected Unexpected Serious Adverse Reactions    |
| SOP        | Standard Operating Procedure                      |
| US         | United States                                     |
| VTE        | Venous Thromboembolism                            |
| WHO        | World Health Organization                         |

164

**2 Master Protocol Summary**

|               |                                                                                                                                                                                                                                                                                                                                                                                                                                                                                                                                                                                                                                                                                                                                                                                                                                                                                                                                                |
|---------------|------------------------------------------------------------------------------------------------------------------------------------------------------------------------------------------------------------------------------------------------------------------------------------------------------------------------------------------------------------------------------------------------------------------------------------------------------------------------------------------------------------------------------------------------------------------------------------------------------------------------------------------------------------------------------------------------------------------------------------------------------------------------------------------------------------------------------------------------------------------------------------------------------------------------------------------------|
| Title         | Master Protocol for Clinical Trials targeting host tissue and the renin-angiotensin-aldosterone system (RAAS) in hospitalized patients with COVID-19                                                                                                                                                                                                                                                                                                                                                                                                                                                                                                                                                                                                                                                                                                                                                                                           |
| Short Title   | Novel Experimental COVID Therapies Affecting Host Response (NECTAR)                                                                                                                                                                                                                                                                                                                                                                                                                                                                                                                                                                                                                                                                                                                                                                                                                                                                            |
| Brief Summary | <p>This Master Protocol describes the general design features of a platform trial evaluating therapies targeting the host response to COVID-19 in hospitalized patients. The Master Protocol provides the background and overarching approach to all trials to be conducted on this platform. This includes a rationale for the choice of primary outcome, inclusion and exclusion criteria, randomization and blinding, interim and final analyses, sample size considerations, safety reporting, and data collection. In addition, the Master Protocol describes general principles for trial operations and oversight. Appendices to the Master Protocol provide agent-specific details, including treatment dose, route and frequency, safety information, and any agent-specific considerations related to drug starting/stopping, inclusion and exclusion criteria and blinding procedures.</p>                                          |
| Objectives    | <p>The overarching goal of the Master Protocol is to find effective strategies for inpatient management of patients with COVID-19. Therapeutic goals for patients hospitalized for COVID-19 include hastening recovery and preventing progression to critical illness, multiorgan failure, or death. Our objective is to determine whether modulating the host tissue response improves clinical outcomes among patients with COVID-19.</p> <p>Potential agents to investigate on this platform include, but are not limited to, TXA127, TRV027, and Fostamatinib. These agents all impact the host tissue response in COVID-19 via a number of unique mechanisms including potential beneficial effects on the RAAS system and formation of neutrophil extracellular traps (NETs). We will evaluate the efficacy of these agents' ability to impact the host tissue response and improve outcomes in patients hospitalized with COVID-19.</p> |
| Methodology   | <p>This platform will be a randomized, placebo-controlled trial of agents targeting the host response in COVID-19 in hospitalized patients. The Master Protocol is designed to be flexible in the number of study arms, the use of a single placebo group, and the stopping and adding of new therapies.</p>                                                                                                                                                                                                                                                                                                                                                                                                                                                                                                                                                                                                                                   |



|          |                                                                                                                                                                                                                                                                                                                                                                                                                                                                                                                                                                                                                                                                                                                                                                                                                                                                                                                                                                                                                                                                                                                                                                                                                                                                                                                                                                                                                                                                                                                                                                                                                                                                                                                                                                                                                                                                                                                                                                                                                                                                                                                                                                                                                                                                                                                                                                                                                                                                                                                                                                                                                                                                                                                                                                                                                                                                                                                                                                              |
|----------|------------------------------------------------------------------------------------------------------------------------------------------------------------------------------------------------------------------------------------------------------------------------------------------------------------------------------------------------------------------------------------------------------------------------------------------------------------------------------------------------------------------------------------------------------------------------------------------------------------------------------------------------------------------------------------------------------------------------------------------------------------------------------------------------------------------------------------------------------------------------------------------------------------------------------------------------------------------------------------------------------------------------------------------------------------------------------------------------------------------------------------------------------------------------------------------------------------------------------------------------------------------------------------------------------------------------------------------------------------------------------------------------------------------------------------------------------------------------------------------------------------------------------------------------------------------------------------------------------------------------------------------------------------------------------------------------------------------------------------------------------------------------------------------------------------------------------------------------------------------------------------------------------------------------------------------------------------------------------------------------------------------------------------------------------------------------------------------------------------------------------------------------------------------------------------------------------------------------------------------------------------------------------------------------------------------------------------------------------------------------------------------------------------------------------------------------------------------------------------------------------------------------------------------------------------------------------------------------------------------------------------------------------------------------------------------------------------------------------------------------------------------------------------------------------------------------------------------------------------------------------------------------------------------------------------------------------------------------------|
| Outcomes | <p><b>Primary Outcome:</b><br/>Oxygen free days through day 28. This is defined as days alive and without supplemental oxygen use during the first 28 days following randomization. Patients who die prior to day 28 are assigned -1 oxygen free days.</p> <p><b>Secondary outcomes:</b></p> <ul style="list-style-type: none"> <li>• In hospital mortality</li> <li>• Proportion of patients alive and oxygen free at days 14 and 28</li> <li>• Proportion of patients with new invasive mechanical ventilation at day 28</li> <li>• 28-day mortality</li> <li>• 60-day mortality</li> <li>• 90-day mortality</li> <li>• WHO 8-point ordinal scale at 14, 28, and 60 days <ul style="list-style-type: none"> <li>▪ 1: Ambulatory – Not hospitalized and no limitation of activities</li> <li>▪ 2: Ambulatory – Not hospitalized with limitation of activities or home oxygen use</li> <li>▪ 3: Hospitalized Mild Disease – Hospitalized, no oxygen therapy</li> <li>▪ 4: Hospitalized Mild Disease – Hospitalized, oxygen by mask or nasal prongs</li> <li>▪ 5: Hospitalized Severe Disease – Non-invasive ventilation or high-flow nasal cannula</li> <li>▪ 6: Hospitalized Severe Disease – Invasive mechanical ventilation</li> <li>▪ 7: Hospitalized Severe Disease – Invasive mechanical ventilation plus additional organ support with- vasopressors, RRT, or ECMO</li> <li>▪ 8: Dead</li> </ul> </li> <li>• Support-free days through Day 28, including: <ul style="list-style-type: none"> <li>○ Hospital-free days</li> <li>○ Ventilator-free days</li> <li>○ Respiratory failure free days</li> </ul> </li> </ul> <p><b>Exploratory Outcomes</b></p> <ul style="list-style-type: none"> <li>• Renal outcomes: acute kidney Injury defined as <math>\geq</math> KDIGO Stage 2 and changes in serum creatinine and estimated Glomerular Filtration Rate</li> <li>• Myocardial injury as measured by changes in troponin before, during and after therapy during hospitalization (when possible, at participating sites)</li> <li>• RAAS pathway mechanistic biomarkers (AngII, Ang(1-7), Plasma renin activity, Aldosterone, ACE and ACE2) (when possible, at participating sites)</li> <li>• Trajectories of biomarkers related to COVID-19 (when possible, at participating sites)</li> <li>• Changes in NT-proBNP before, during and after therapy during hospitalization (when possible, at participating sites)</li> </ul> <p><b>Safety outcomes (systematically collected during index hospitalization):</b></p> <ul style="list-style-type: none"> <li>• Hypotension as defined by low arterial blood pressure leading to either [1] initiation or increase in vasopressor therapy, [2] administration of a fluid bolus of 500 ml or more, or [3] modification of the dose or discontinuation of the study drug.</li> <li>• Allergic reaction, including angioedema and rash</li> <li>• Incident renal replacement therapy during hospitalization</li> </ul> |
|----------|------------------------------------------------------------------------------------------------------------------------------------------------------------------------------------------------------------------------------------------------------------------------------------------------------------------------------------------------------------------------------------------------------------------------------------------------------------------------------------------------------------------------------------------------------------------------------------------------------------------------------------------------------------------------------------------------------------------------------------------------------------------------------------------------------------------------------------------------------------------------------------------------------------------------------------------------------------------------------------------------------------------------------------------------------------------------------------------------------------------------------------------------------------------------------------------------------------------------------------------------------------------------------------------------------------------------------------------------------------------------------------------------------------------------------------------------------------------------------------------------------------------------------------------------------------------------------------------------------------------------------------------------------------------------------------------------------------------------------------------------------------------------------------------------------------------------------------------------------------------------------------------------------------------------------------------------------------------------------------------------------------------------------------------------------------------------------------------------------------------------------------------------------------------------------------------------------------------------------------------------------------------------------------------------------------------------------------------------------------------------------------------------------------------------------------------------------------------------------------------------------------------------------------------------------------------------------------------------------------------------------------------------------------------------------------------------------------------------------------------------------------------------------------------------------------------------------------------------------------------------------------------------------------------------------------------------------------------------------|

|                                    |                                                                                                                                                                                                                                                                                                                                                                                                                                                                                                                                                                                                                                                                                                                                                                                                                                                                              |
|------------------------------------|------------------------------------------------------------------------------------------------------------------------------------------------------------------------------------------------------------------------------------------------------------------------------------------------------------------------------------------------------------------------------------------------------------------------------------------------------------------------------------------------------------------------------------------------------------------------------------------------------------------------------------------------------------------------------------------------------------------------------------------------------------------------------------------------------------------------------------------------------------------------------|
| Study Duration                     | Multiple arms can actively enroll concurrently for an anticipated 15 months.                                                                                                                                                                                                                                                                                                                                                                                                                                                                                                                                                                                                                                                                                                                                                                                                 |
| Duration of Participant follow-up  | Duration of hospitalization with post-discharge follow-up for up to 90 days after randomization. (Specific eligibility criteria are in the main protocol text)                                                                                                                                                                                                                                                                                                                                                                                                                                                                                                                                                                                                                                                                                                               |
| Population                         | Patients hospitalized for COVID-19 with laboratory confirmed SARS-CoV-2 infection on oxygen therapy.                                                                                                                                                                                                                                                                                                                                                                                                                                                                                                                                                                                                                                                                                                                                                                         |
| Study Sites                        | Sites affiliated with NHLBI-CONNECTS Network of Networks and other networks and sites with previous clinical trial experience. Selected sites will be sufficiently equipped and experienced to safely enroll and follow patients, and to produce accurate data. The number of enrolling sites will be informed by the number of hospitalized patients with COVID-19 at active sites, the sample size required, and projected patient accrual.                                                                                                                                                                                                                                                                                                                                                                                                                                |
| Planned Maximum Number of Subjects | <p>We expect the maximum sample size to be about 300 per interventional treatment arm.</p> <p>Prior to the first interim analysis, sample size adequacy will be re-assessed based on the pooled (across all active and placebo arms) distribution of the primary outcome. The maximum sample size may be increased in order to achieve 85% power at the planned MDE85. If the maximum sample size per arm is increased prior to the first interim analysis, the efficacy and inferiority thresholds will be recomputed to ensure a 2.5% type-I error rate regarding the assessment of efficacy, and &lt;1% chance of incorrectly stopping early for inferiority.</p> <p>Placebo enrollment beyond 300 participants may be required to ensure at least 300 concurrently randomized and eligibility-matched placebo participants for comparison with each active drug arm.</p> |
| Description of Study Agents        | Specific agents will be described within the agent-specific appendices. The therapies relevant to this Master Protocol must have some mechanistic link to preventing progression to critical illness, multiorgan failure, or death in patients with COVID-19 and related to the host tissue response to COVID-19.                                                                                                                                                                                                                                                                                                                                                                                                                                                                                                                                                            |
| Key Procedures                     | Participants will be recruited in the inpatient setting. They will undergo baseline evaluations for eligibility. They will then be randomized, stratified by site, and study intervention will begin. Baseline laboratories will be required, and biobanking will occur both at randomization, and during the study period. The primary outcome will be assessed daily via chart review during hospitalization. Patients will undergo additional data collection by telephone, mail, in-person visits or electronic (e.g., email, text message) surveys after discharge.                                                                                                                                                                                                                                                                                                     |

|                             |                                                                                                                                                                                                                                                                                                                                                                                                                                                                                                                                                                                                                                                                                                                                                                                                                                                                                                                                                                                                                                                                                                                                                                                                                                                                                                                                                                                                                                                                                                                                                                                                                                                         |
|-----------------------------|---------------------------------------------------------------------------------------------------------------------------------------------------------------------------------------------------------------------------------------------------------------------------------------------------------------------------------------------------------------------------------------------------------------------------------------------------------------------------------------------------------------------------------------------------------------------------------------------------------------------------------------------------------------------------------------------------------------------------------------------------------------------------------------------------------------------------------------------------------------------------------------------------------------------------------------------------------------------------------------------------------------------------------------------------------------------------------------------------------------------------------------------------------------------------------------------------------------------------------------------------------------------------------------------------------------------------------------------------------------------------------------------------------------------------------------------------------------------------------------------------------------------------------------------------------------------------------------------------------------------------------------------------------|
| <p>Statistical Analysis</p> | <p>The effect of each study agent on the primary outcome, versus matching placebo, will be quantified using the odds ratio to evaluate the odds of greater oxygen free days at day 28 (i.e., the primary estimand). Estimation and inferences about the primary estimand will be made using proportional odds logistic regression methods. For each study agent, the comparison group will consist of all concurrently randomized placebo participants meeting the inclusion and exclusion criteria for that agent.</p> <p>For each arm, we will use pre-planned interim analyses at fixed recruitment intervals to consider ending enrollment early due to strong evidence of inferiority or futility. Early stopping and final analysis thresholds will be selected to ensure a type-I error probability of 2.5% (one-sided), separately for each study agent.</p> <p>We will use a modified intention to treat (mITT) approach for primary analyses. All available data on participants who were eligible, randomized, and received at least some study drug will be used to compare each treatment versus control, regardless of post-randomization adherence to study protocols. The intercurrent event of death will be coded as a special value in the primary outcome (i.e., composite strategy). Censoring in the primary outcome will be modeled using likelihood methods. No other intercurrent events will affect the primary outcome (i.e., treatment policy strategy). We will monitor closely for patients who are randomized who do not receive study drug to ensure our preplanned sample size targets for the mITT group are met.</p> |
|-----------------------------|---------------------------------------------------------------------------------------------------------------------------------------------------------------------------------------------------------------------------------------------------------------------------------------------------------------------------------------------------------------------------------------------------------------------------------------------------------------------------------------------------------------------------------------------------------------------------------------------------------------------------------------------------------------------------------------------------------------------------------------------------------------------------------------------------------------------------------------------------------------------------------------------------------------------------------------------------------------------------------------------------------------------------------------------------------------------------------------------------------------------------------------------------------------------------------------------------------------------------------------------------------------------------------------------------------------------------------------------------------------------------------------------------------------------------------------------------------------------------------------------------------------------------------------------------------------------------------------------------------------------------------------------------------|

165

166

### 3 Introduction, Background Information and Scientific Rationale

#### 3.1 Background Information, Significance and Relevant Literature

168 The severe acute respiratory syndrome coronavirus 2 (SARS-CoV-2), which causes coronavirus  
 169 disease 2019 (COVID-19), has resulted in a global pandemic. The clinical spectrum of COVID-19  
 170 infection is broad, encompassing asymptomatic infection, mild upper respiratory tract illness, and  
 171 severe viral pneumonia with respiratory failure and death. Between 13 and 40% of patients become  
 172 hospitalized,<sup>1,2</sup> up to 30% of those hospitalized require admission for intensive care, and there is a  
 173 13% inpatient mortality rate.<sup>3,4</sup> The reasons for hospitalization include respiratory support, as well  
 174 as support for failure of other organs, including the heart and kidneys. The risk of thrombotic  
 175 complications is increased, even when compared to other viral respiratory illnesses, such as  
 176 influenza.<sup>5</sup> While 82% of hospitalized patients with COVID-19 are ultimately discharged alive,<sup>6</sup>  
 177 median length of stay is 10-13 days.<sup>7</sup> Clinical trials in COVID-19 inpatients are needed to find better  
 178 strategies to prevent or treat progression to critical illness, multiorgan failure, or death.

179 Early work in treating COVID-19 has focused on preventing worsening of the initial clinical  
 180 presentation to prevent hospitalization and disease progression to organ failure and death. Studies  
 181 conducted under this Master Protocol are expected to extend our knowledge of how to manage  
 182 patients who are hospitalized for COVID-19 illness.

183 This protocol intends to define effective therapeutic regimens in a randomized trial of patients  
 184 hospitalized with COVID-19. The primary outcome is oxygen free days through day 28.

**185 3.2 Relevance of host tissue pathway(s) to COVID-19**

186 Most adults with SARS-CoV-2 infection recover after a brief illness with fever, cough, and fatigue or  
187 similar symptoms. Current therapies are limited in the subset of patients who progress to  
188 hypoxemic respiratory failure and acute respiratory distress syndrome (ARDS).<sup>8-10</sup> The SARS-CoV-  
189 2 virus enters pulmonary and myocardial cells by the binding of the spike viral protein to the  
190 Angiotensin-Converting Enzyme 2 (ACE2) receptor, a key actuator in the renin-angiotensin-  
191 aldosterone system (RAAS). Thus, in COVID-19, RAAS has been directly implicated in the  
192 pathogenesis of ARDS as part of the host tissue response. ACE2 catalyzes the conversion of  
193 Angiotensin II (AngII) to Ang(1-7). When ACE2 is not present AngII remains at increased levels  
194 stimulating vasoconstriction, the production of inflammatory cytokines, and pulmonary fibrosis.<sup>11</sup>  
195 Even before COVID-19, ACE2 was found to be protective in preclinical models of acute lung injury  
196 and ARDS.<sup>12-14</sup> Mice deficient in ACE2 develop acute lung injury following a challenge with a variety  
197 of insults,<sup>15,16</sup> which improves on repletion with recombinant ACE2.<sup>17</sup>

**198 3.3 Rationale for evaluating host tissue therapies in a single platform among patients who  
199 are hospitalized with COVID-19**

200 The importance of the host tissue response is important to consider in patients hospitalized with  
201 COVID-19. ACE/Ang II signaling in human disease is suggested by increased levels of ACE and  
202 Ang II in ARDS and sepsis patients.<sup>18-21</sup> Patients with the D allele for the ACE gene have higher  
203 ACE and Ang II levels in tissue and serum<sup>22</sup> and these patients are at higher risk of death from  
204 ARDS in multiple large cohorts.<sup>22-24</sup> Restoration of ACE2 through the administration of recombinant  
205 ACE2 in a phase II trial of ARDS in humans (n=44) appeared to safely reduce AngII levels and  
206 increase Ang(1-7) levels without causing significant hemodynamic changes.<sup>25</sup> Further, up to 20% of  
207 patients with COVID-19 develop myocardial injury, which has been independently associated with  
208 increased arrhythmias, shock and mortality.<sup>26-28</sup> ACE2 receptors are present in cardiac myocytes  
209 and fibroblasts and the endothelium of coronary arteries, and the ACE2 receptor has been  
210 implicated as a potential mediator of cardiac injury in COVID-19.<sup>29</sup> Thrombotic events are a known  
211 complication in patients hospitalized with COVID-19. In vitro evidence suggests, R406, the active  
212 component of fostamatinib, can inhibit the Fc-mediated release of proinflammatory cytokines by  
213 macrophages and platelet-mediated thrombosis provoked by SARS-CoV-2 specific spike  
214 antigen/antibody complexes. Furthermore, R406 also has been shown to inhibit the release of  
215 neutrophil extracellular traps from neutrophils stimulated with plasma from patients with COVID-19.  
216 Taken together, it is hypothesized that fostamatinib will decrease the inflammatory milieu generated  
217 through Fc-activation, ultimately resulting in decreasing immunothrombosis. Preventing  
218 immunothrombosis in the pulmonary vasculature could mitigate lung injury and hasten recovery  
219 from COVID-19.

220 Recent large-scale cohort studies, however, have not found an association between current use of  
221 RAAS inhibitors and either increased risk of contracting COVID-19 infection or increased risk of  
222 severe disease from COVID-19.<sup>30,31</sup> Two randomized trials in patients hospitalized with COVID-19  
223 who were already taking RAAS inhibitors found no benefit of stopping RAAS inhibitors when  
224 compared to continuing them (BRACE CORONA, REPLACE COVID).<sup>32-34</sup> Thus, mechanistic  
225 pathophysiology and preliminary data in ARDS provide a compelling rationale for studying the effect  
226 of agents targeting the RAAS system using a RAAS platform as we propose.

227 There is strong rationale for considering multiple host tissue agents on this platform due to  
228 complementary but distinct mechanisms of action. TRV027 and Ang(1-7) both work to restore AngII  
229 balance by working downstream of the ACE2 receptor via different mechanisms of improving the  
230 Ang(1-7) to AngII ratio. (**Figure 1**). Recent data from two Phase II trials suggested that fostamatinib  
231 may have substantial impact on outcomes in patients hospitalized with COVID-19, providing

232 compelling rationale for including this agent on our platform.. A recent placebo-controlled  
 233 randomized phase 2 study in hospitalized adults with Covid-19 (NCT04579393) suggested  
 234 fostamatinib in addition to usual care was safe and did not result in more serious adverse events  
 235 (10.5% in the fostamatinib group vs. 22% in the placebo group). Additionally, multiple secondary  
 236 efficacy endpoints showed trends favoring the patients receiving fostamatinib, including 28-day  
 237 mortality, days free of oxygen, and recovery as measured on the 8-point ordinal scale at day 15.

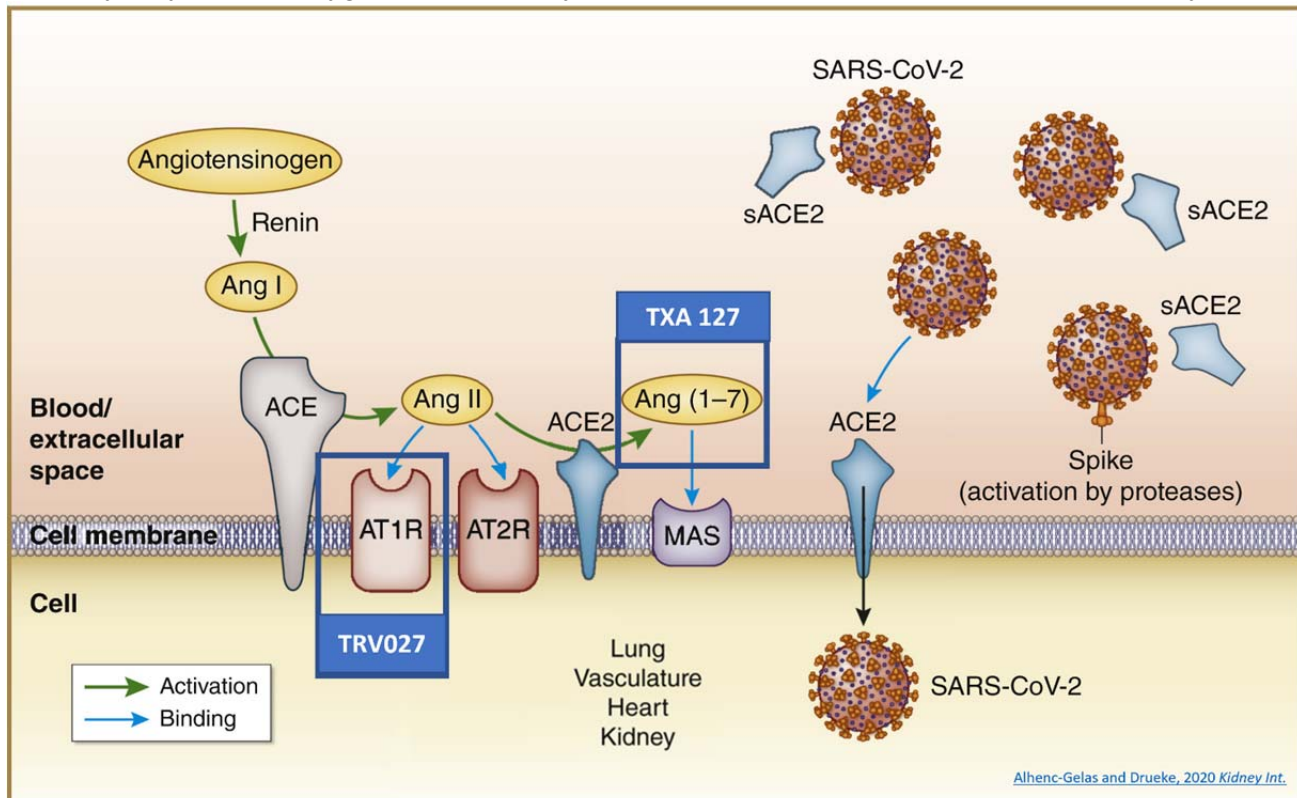

238  
 239 **Figure 1.** Adapted from Alhenc-Gelas and Druke 2020; The physiological steps of the generation of  
 240 angiotensin II and angiotensin 1-7 and their actions on specific receptors are shown. The interaction of  
 241 TRV027, and TXA127 at the specific points in the pathway is also displayed. Angiotensin II is  
 242 generated from angiotensinogen by the actions of renin and subsequently anchored to ACE in the cell  
 243 membrane. ACE2, another transmembrane enzyme, removes the carboxyterminal amino acid of  
 244 angiotensin II, thereby inactivating angiotensin II but generating angiotensin 1-7 with biological activity  
 245 distinct from angiotensin II. Angiotensin 1-7 activates the Mas receptor.

### 246 3.4 Potential Risks & Benefits

247 Participating in this Master Protocol include risks related to the treatment, as well as risks related to  
 248 privacy and confidentiality. Benefits include the potential for benefit of the therapeutic strategy,  
 249 increased attention to the participant's treatments and clinical course when compared with usual  
 250 care, and the global societal benefit of contributing knowledge about COVID-19 treatments and  
 251 pathophysiology. See sections 12 and 13 and agent-specific Appendices for details.

## 252 4 Study Objectives and Purpose

253 The overarching objective of this platform is to iteratively test treatment strategies targeting the host  
 254 tissue response for improving clinical outcomes among adults hospitalized with COVID-19.  
 255 Treatment strategies will be added to the current best practice and tested against best practice plus

ACTIV-4 Host Tissue  
Protocol Version: 1.8 dated 2021.12.17.

256 placebo. Best practice may itself be updated as therapies become available or are shown to be  
257 effective (or ineffective).

#### 258 **4.1 Study Objectives**

259 Our objective is to determine the impact of modulating the host tissue response, including  
260 counterbalancing RAAS activity, on mortality and outcomes related to ARDS. A further objective is  
261 to determine which of the different RAAS agents' targets (AT1r biased agonist, Ang[1-7] infusion)  
262 and associated mechanisms of action, when added to current best practice and compared to  
263 current best practice plus placebo, result in an effective therapeutic approach to the RAAS system  
264 in patients infected with SARS-CoV-2. Study Hypothesis

#### 265 **4.2 Study Hypothesis**

266 We hypothesize the administration of Ang (1-7), TRV027, and fostamatinib will improve clinical  
267 outcomes and will result in improvement in oxygen-free days through day 28.

### 268 **5 Study Design and Outcomes**

#### 269 **5.1 Overall Study Design**

270 This Master Protocol describes an overarching approach to studies of blinded, placebo-controlled  
271 therapeutic approaches of host-tissue targeted therapies in hospitalized COVID-19 patients. The  
272 Master Protocol is designed so the platform can be flexible in the number of study arms, the use of  
273 a single placebo group, and the stopping and adding of new therapies, while using a common  
274 approach to design and implementation.

#### 275 **5.2 Randomization**

276 Randomization assignments are at the participant level and treatments are assigned at  
277 randomization. Randomization will be implemented using permuted blocks and stratified by site and  
278 eligibility group. Stratification ensures balance across the active and pooled placebo groups at  
279 regular enrollment intervals within each stratum, thus mitigating the impact of stratum (i.e., site)  
280 heterogeneity on assessments of treatment effect. Allocation will be equally distributed across arms  
281 for which the participant is eligible.

#### 282 **5.3 Study Outcomes**

##### 283 **5.3.1 Primary Study Outcome**

284 The primary outcome for this platform is oxygen free days (OFD) at day 28. It is designed to assess  
285 lung function as determined by freedom from oxygen therapy for the first 28 days following  
286 randomization. This is an important patient-centric outcome reflective of recovery from SARS-CoV-2  
287 infection. Additional rationale for the primary outcome is explained in detail in Appendix A. OFD is a  
288 clinically relevant, longitudinal measure of lung function and mortality assessed at 28 days after  
289 randomization. Liberation from oxygen is an important patient-centric outcome and freedom from  
290 oxygen dependency is a primary goal for patients during both hospitalization and the early post-  
291 discharge period. OFD will be calculated using principles developed during the past 20 years for other  
292 free-day clinical trial outcomes, including ventilator free days,<sup>35,36</sup> organ support free days,<sup>37</sup> and  
293 hospital free days.<sup>38</sup> The concept of time to liberation from oxygen therapy, and the related outcome  
294 of time to recovery, has been extensively used in COVID-19 trials evaluating in-hospital therapies.<sup>39,40</sup>  
295 For example, the primary outcome for the first trial on the Adaptive COVID-19 Treatment Trial  
296 platform (ACTT-1)<sup>41</sup> was time to recovery during the first 28 days after randomization, defined as time  
297 between randomization and the earlier of hospital discharge or discontinuation of oxygen therapy and  
298 other in-hospital therapies for COVID-19. Oxygen free days was selected over time to recovery, as

ACTIV-4 Host Tissue

Protocol Version: 1.8 dated 2021.12.17.

299 defined in ACTT-1, as the primary outcome for our proposal for two reasons: (1) to capture home  
300 oxygen use as part of the primary outcome; and (2) to incorporate the competing risk of death into the  
301 primary outcome using the same methodology commonly used for other outcomes evaluating  
302 duration of organ support, such as ventilator free days.  
303

304 OFD will be calculated as the number of calendar days during the first 28 days after randomization  
305 during which the patient was alive and not receiving new supplemental oxygen therapy. Patients will  
306 be considered to be receiving supplemental oxygen therapy when they are receiving any of the  
307 following: supplemental oxygen by nasal cannula, supplemental oxygen by face mask, high flow  
308 nasal cannula (HFNC), non-invasive ventilation (NIV), invasive mechanical ventilation (IMV), or  
309 extracorporeal membrane oxygenation (ECMO). The day of randomization is denoted as Day 0.  
310 Starting with calendar day 1 (the day after randomization) and continuing for 28 days, study  
311 personnel will document whether the patient received oxygen therapy on each day for any duration  
312 of time. While the patient is in the hospital, the highest level of respiratory support received during  
313 each calendar day will be documented according to the 8-category WHO COVID-19 clinical status  
314 scale. Categories 4, 5, 6, and 7 indicate in-hospital oxygen use.  
315

316 Use of supplemental oxygen at home after discharge will be assessed via telephone follow-up calls  
317 and text/email responses to the participant or surrogates. Patients who chronically used  
318 supplemental oxygen prior to their COVID-19 illness will be considered oxygen free when they  
319 return to the same level of oxygen support, they had been using prior to COVID-19 illness. For  
320 example, a patient who chronically used supplemental oxygen at 4 liters per minute via nasal  
321 cannula before COVID-19 and who was intubated for acute management of COVID-19 would be  
322 considered oxygen free for calculation of the primary outcome when he/she returned to oxygen  
323 support via nasal cannula at 4 liters per minute or less.  
324

325 The primary outcome, OFD, will be calculated as 28 minus the number of days with oxygen use  
326 during the first 28 days after randomization. OFD will be coded as -1 for patients who died before  
327 study day 28. Hence, the range for OFD is from -1 to 28 days. The first day of follow-up is the day  
328 after randomization, so 28 OFDs are the maximum possible days (Appendix A).  
329

### 330 5.3.2 Secondary Outcomes

- 331 • Alive and oxygen free at days 14 and 28
- 332 • Alive and respiratory failure-free at days 14 and 28
- 333 • Alive and free of new invasive mechanical ventilation at 14 and 28 days
- 334 • In-hospital, 28-day, 60-day and 90-day mortality
- 335 • WHO 8-point ordinal scale at 14, 28 and 60 days
  - 336 ▪ 1: Ambulatory – Not hospitalized, no limitation of activities
  - 337 ▪ 2: Ambulatory – Not hospitalized with limitation of activities or home  
338 oxygen therapy
  - 339 ▪ 3: Hospitalized Mild Disease – Hospitalized, no oxygen therapy
  - 340 ▪ 4: Hospitalized Mild Disease – Oxygen by mask or nasal prongs
  - 341 ▪ 5: Hospitalized Severe Disease – Non-invasive ventilation of high-flow  
342 oxygen
  - 343 ▪ 6: Hospitalized Severe Disease – Invasive mechanical ventilation
  - 344 ▪ 7: Hospitalized Severe Disease – Invasive mechanical ventilation plus  
345 additional organ support with-vasopressors, RRT, or ECMO
  - 346 ▪ 8: Dead
- 347 • Support-free days to Day 28, including:

ACTIV-4 Host Tissue

Protocol Version: 1.8 dated 2021.12.17.

- 348                                   ▪ Hospital-free days
- 349                                   ▪ Respiratory failure-free days
- 350                                   ▪ Ventilator-free days

351

352 Alive and respiratory failure-free at day 28, the WHO 8-point ordinal scale at day 28, and mortality  
353 at day 28 are key secondary outcomes that will be treated as a family for testing purposes, even  
354 though the studies will not be adequately powered to detect anything but a very strong treatment  
355 effect on these outcomes. A supplementary analysis to assess the evidence that treatment lowers  
356 the risk of death in a way that is consistent with its effect on nonfatal outcomes will be performed. A  
357 respiratory failure-free day is defined as a day alive without the use of HFNC, NIV, IMV, or ECMO.  
358 Participants that are alive but not hospitalized are considered free of respiratory failure.

### 359 **5.3.3 Exploratory Outcomes**

360 Exploratory outcomes will include the following (further defined in Appendix C):

- 361           • Myocardial injury described by changes in troponin before, during and after therapy during  
362           hospitalization (when possible, at participating sites).
- 363           • Myocardial function described by changes in NT-proBNP before, during and after therapy  
364           during hospitalization (when possible, at participating sites).
- 365           • RAAS mechanistic biomarkers (AngII, Ang(1-7), Plasma renin activity, Aldosterone, ACE  
366           and ACE2) before, during and after therapy during hospitalization (when possible, at  
367           participating sites).
- 368           • Renal outcomes: acute kidney injury (following KDIGO) defined as  $\geq$  KDIGO Stage 2 and  
369           changes in serum creatinine and estimated Filtration Rate during hospitalization
- 370           • Trajectories of biomarkers related to COVID-19 during hospitalization (when possible, at  
371           participating sites).

372

373 Exploratory outcomes may be collected at just a subset of sites.

### 374 **5.3.4 Safety Outcomes (systematically collected during index hospitalization)**

375 Safety outcomes will be measured to reflect the expected adverse consequences of therapeutic  
376 strategies.

- 377           • Hypotension as defined by low arterial blood pressure leading to either [1] initiation or  
378           increase in vasopressor therapy, [2] administration of a fluid bolus of 500 ml or more, or [3]  
379           modification of the dose or discontinuation of the study drug.
- 380           • Allergic reaction, including rash and angioedema
- 381           • Incident renal replacement therapy during hospitalization

382

## 383 **6 Study population and enrollment**

384 A broad population of adults hospitalized with COVID-19 will be enrolled on this platform without  
385 exclusions based on age, sex, race, ethnicity, severity of disease or preferred language. Exclusion  
386 criteria are related to safety. Eligibility criteria must be fulfilled at the time of randomization.

387

### 388 **6.1 Inclusion criteria**

- 389           1. Hospitalized for COVID-19
- 390           2.  $\geq$ 18 years of age
- 391           3. SARS-CoV-2 infection, documented by:



- 392 a) a nucleic acid test (NAT) or equivalent testing within 3 days prior to  
393 randomization OR  
394 b) documented by NAT or equivalent testing more than 3 days prior to  
395 randomization AND progressive disease suggestive of ongoing SARS-CoV-2  
396 infection per the responsible investigator (For non-NAT tests, only those  
397 deemed with equivalent specificity to NAT by the protocol team will be  
398 allowed. A central list of allowed non-NAT tests is maintained in Appendix F.)
- 399 4. Hypoxemia, defined as SpO<sub>2</sub> <92% on room air, new receipt of supplemental  
400 oxygen to maintain SpO<sub>2</sub> ≥92%, or increased supplemental oxygen to maintain  
401 SpO<sub>2</sub> ≥92% for a patient on chronic oxygen therapy
- 402 5. Symptoms or signs of acute COVID-19, defined as one or more of the following:  
403 a) cough  
404 b) reported or documented body temperature of 100.4° F or greater  
405 c) shortness of breath  
406 d) chest pain  
407 e) infiltrates on chest imaging (x-ray, CT scan, lung ultrasound)

## 408 **6.2 Exclusion criteria**

- 409 1. COVID-19 symptom onset >14 days prior to randomization  
410 2. Hospitalized for >72 hours prior to randomization  
411 3. Pregnancy  
412 4. Breastfeeding  
413 5. Prisoners  
414 6. End-stage renal disease (ESRD) on dialysis  
415 7. Patient and/or clinical team is not pursuing full medical management (if a patient has a  
416 Do Not Resuscitate order that precludes chest compressions in the event of a cardiac  
417 arrest but is otherwise pursuing full medical management, he/she is eligible for this trial).  
418 8. The treating clinician expects inability to participate in study procedures or participation  
419 would not be in the best interests of the patient  
420

## 421 **6.3 Justification of exclusion criteria**

422 The study medications' impact on breastfeeding and breastmilk is unknown, and we therefore  
423 exclude breastfeeding. We aim to study the impact of early interventions in the hospitalized setting  
424 and thus exclude those people who have prolonged symptoms or have been hospitalized greater  
425 than 72 hours prior to randomization. A patient is considered to have been hospitalized for > 72  
426 hours prior to randomization if the presentation that initiated the current inpatient admission began  
427 more than 72 hours before randomization, regardless of the initial location of care (e.g., current  
428 hospital or transferring hospital) or level of care (e.g., emergency department, hospital ward,  
429 intensive care unit).

## 430 **6.4 Special screening procedures**

431 The site investigator or delegate will screen for hospitalized patients with laboratory confirmed  
432 COVID-19 (that is, a positive laboratory test for SARS-CoV-2) or a pending SARS-CoV-2 test.  
433 Treating clinicians will also be instructed to contact the site investigator or delegate for patients with  
434 a high clinical suspicion of COVID-19 prior to confirmatory testing.

**435 6.5 Assessment of eligibility and exclusion tracking**

436 For patients who appear to meet inclusion criteria during screening, an electronic case report form  
437 will be completed to determine eligibility and track exclusions. The electronic case report form will  
438 be accessed and stored in the electronic database. At the time of entry into the screening database,  
439 the patient will be assigned a screening number.

440 If a patient appears to meet all eligibility criteria, the site investigator or delegate will approach the  
441 treating clinician to ask permission to approach the patient or Legally Authorized Representative  
442 (LAR) to confirm eligibility, discuss potential study recruitment, and proceed with informed consent.

443 For all excluded patients, including refusal by the treating clinician or patient/surrogate, a small  
444 number of de-identified variables will be collected including month and year the patient met  
445 screening criteria, age, sex, ethnicity, patient location, and reason(s) the patient was excluded. For  
446 the safety of research personnel and conservation of personal protective equipment (PPE), these  
447 encounters may occur via telephone or videophone.

**448 6.6 Process of obtaining informed consent**

449 Informed consent is a process initiated prior to the individual's agreeing to participate in the study  
450 and continues throughout the individual's study participation. Informed consent will be obtained  
451 following institutional COVID policy to protect study staff. Informed consent will be obtained from the  
452 patient or from a surrogate decision maker if the patient lacks decision-making capacity.

453 In some instances, bringing a paper consent form and pen to the bedside of a patient with known or  
454 suspected COVID-19 and then taking these out of the room would violate infection control principles  
455 and policies. Given the infectious risk from COVID-19 and potential shortages of PPE, there is a  
456 moral and practical imperative to minimize face-to-face contact between patients and non-clinical  
457 personnel. The current pandemic also presents unique challenges to obtaining consent from a  
458 participant's LAR. To minimize infectious risk, many institutions are not allowing visitors to enter the  
459 hospital. Furthermore, the LAR is likely to have been exposed to the patient and may therefore be  
460 under self-quarantine at the time of the informed consent discussion.

461 Therefore, in addition to the traditional approach of an in-person consent discussion and signed  
462 paper informed consent document, we will allow use of "no-touch" consent procedures for this trial.  
463 Below, we outline three examples of no-touch consent procedures that may be used: (a) a paper-  
464 based approach; (b) an electronic/e-consent approach; and (c) attestation of informed consent.

**465 6.6.1 Paper-based approach**

- 466 1. The informed consent document is delivered to the patient or LAR.
  - 467 a. If the patient or LAR is on-site, the informed consent document may be delivered to the
  - 468 patient or LAR either by research staff or by clinical staff.
  - 469 b. If the LAR is off-site, the informed consent document may be emailed, faxed, or otherwise
  - 470 electronically transferred to the LAR (method dictated by institutional policy).
- 471 2. Research staff discuss the informed consent document with the patient or LAR either in-person
- 472 or by telephone or videophone. This step confirms subject/LAR identity.
- 473 3. If the patient or LAR decides to consent to participate, the patient or LAR signs the paper copy of
- 474 the informed consent document.
- 475 4. A photograph is taken of the signature page by the patient or LAR (or research staff if onsite with
- 476 patient/LAR) of the informed consent document and uploaded into the electronic database (e.g.,
- 477 REDCap).

ACTIV-4 Host Tissue

Protocol Version: 1.8 dated 2021.12.17.

- 478 a. If using the patient's device (such as a patient's personal cellular phone), a survey link can  
479 be sent to their device to allow direct upload of the image into the electronic database (e.g.,  
480 REDCap).  
481 b. If using a staff device, it must be approved to store PHI by the local institution. In that case,  
482 research personnel can take a photograph of the signature page of the informed consent  
483 document either directly or through the window or glass door leading into the patient's room.  
484 The photograph can then be uploaded into the electronic database. If a staff device is taken  
485 into the patient's room to take a photograph it must be able to be disinfected according to  
486 local institutional practices.

487 5. Research staff and the witness provide signatures within the electronic database (e.g., REDCap)  
488 confirming their participation in the informed consent process.

489 6. The patient or LAR retains the paper consent document. The image of the signature page may  
490 be printed and bundled with a copy of the blank informed consent document for research records.

### 491 **6.6.2 Electronic/e-consent approach**

492 1. The electronic informed consent document is opened on a research device or a link for the  
493 electronic informed consent document is sent to the patient's or LAR's device.

494 2. Research staff discuss the informed consent document with the patient or LAR either in person  
495 or by telephone or videophone. This step confirms subject/LAR identity.

496 3. If the patient or LAR decides to consent to participate the patient or LAR signs the electronic  
497 informed consent document. This signature may be either:

498 a. an actual signature (often tracing a finger on the screen) OR

499 b. a username and password specific to the individual signing

500 4. Research staff and the witness provide signatures within the electronic database (e.g., REDCap)  
501 confirming their participation in the informed consent process.

502 5. The image of the signature page may be printed and bundled with a copy of the blank informed  
503 consent document for research records.

504

505 If a hospital device is provided to facilitate electronic or paper-based consent, that device will be  
506 disinfected according to institutional protocols and removed by research staff or clinical staff during  
507 the next entry into the patient's room.

508 This approach complies with relevant regulations and sub-regulator guidance at 45 CFR 46.117, 45  
509 CFR 164.512, 21 CFR 11 Subpart C (11.100–11.300), <https://www.hhs.gov/ohrp/regulations-and-policy/guidance/use-electronic-informed-consent-questions-and-answers/index.html>,  
510 <https://www.fda.gov/regulatory-information/search-fda-guidance-documents/informed-consent>.  
511

512 The information for the informed consent discussion will be provided in an informed consent  
513 document (or electronic equivalent), that has been approved by the sIRB and in a language  
514 comprehensible to the potential participant, using an interpreter if necessary. The information  
515 presented in the consent form and by the research staff will detail the nature of the trial and what is  
516 expected of participants, including any potential risks or benefits of taking part. It will be clearly  
517 stated that the participant is free to withdraw from the trial at any time for any reason without  
518 prejudice to future care, and with no obligation to give the reason for withdrawal. Where a patient  
519 does not speak English, a short-form consent and qualified interpreter will be employed, using  
520 similar "no-touch" principles. Use of an interpreter and the interpreter's identity will be documented  
521 on the electronic consent.

**522 6.6.3 Attestation of informed consent**

523 If none of the options outlined above (traditional signature and storage of a paper consent form,  
524 electronic photographs of a signed consent page, or e-consent) are available, study personnel may  
525 attest to completion of the informed consent process using the procedures outlined below.  
526 Importantly, the process of informed consent using this attestation option should not change  
527 compared with the traditional method of obtaining informed consent for trial participation except for  
528 the method of documenting the consent process in the research record. Rather than storing a paper  
529 document with the participant's signature, a member of the research team and an impartial witness  
530 will attest to completion of the informed consent process and that the participant signed the  
531 informed consent document. This option of attestation of informed consent is not available when  
532 obtaining consent through a LAR.

533 Procedures for attestation of informed consent:

- 534 1. An unsigned paper consent form is provided to the patient by a health care worker or study  
535 member.
- 536 2. The study member obtaining consent arranges an in-person meeting or three-way call or video  
537 conference with himself/herself, the patient, and an impartial witness. If desired and feasible,  
538 additional people requested by the patient (e.g., next of kin) may also join this discussion.
- 539 3. A study member reviews consent and answers questions in the presence of the impartial  
540 witness.
- 541 4. Patient signs the paper informed consent document while the witness is listening on the phone or  
542 directly observing.
- 543 5. Patient provides verbal confirmation that he/she would like to participate in the trial, and he/she  
544 has signed and dated the informed consent document. This signed informed consent document  
545 stays with the patient due to the risk of spreading the virus.
- 546 6. Study member and witness attest that other techniques for documenting informed consent were  
547 not available for this participant and that the participant provided written informed consent for trial  
548 participation by signing a paper informed consent document. An attestation form with signatures  
549 from the study member and witness will be saved as evidence of the informed consent process. A  
550 signature from the participant will not be saved in the research record.

**551 6.7 Randomization and blinding**

552 Randomization assignments are performed for patients at enrollment. Randomization will be  
553 implemented using a permuted block method and stratified by site and eligibility group. The  
554 eligibility group for each participant is the set of study arms for which the participant is eligible.  
555 Stratification by site ensures balance across the active and pooled placebo groups at regular  
556 enrollment intervals at each site, thus mitigating the impact of site heterogeneity on assessments of  
557 treatment effect. Eligible participants will be randomized through a central electronic system. On  
558 entry to the study and confirmation of eligibility to at least one active drug arm, the participant will be  
559 randomized m:1 to either the active (will receive one of the study drugs) or placebo (will not receive  
560 one of the study drugs) condition. Here, m is the number of open study arms for which the patient is  
561 eligible. If the patient is eligible for only one agent, or only one study arm is open, then allocation is  
562 1:1. For two agents, it is 2:1, for three it is 3:1 and so on. Once participants are assigned as active  
563 or placebo, the participant will then be randomized with equal probability to receive one of the active  
564 drugs for which they are eligible, or a corresponding placebo (matched by route and frequency of  
565 administration). For the purposes of interim and final analyses, the route and frequency of placebo  
566 will be ignored, and all placebo participants will be pooled together as a single group. In comparing  
567 an active drug versus placebo, only those placebo participants that were eligible for the active drug  
568 will be considered. Randomization will be implemented using permuted blocks, stratified by site and

569 eligibility group. A block size multiplier, either 1 or 2, will be selected uniformly at random for each  
570 block. Blocking ensures balance within strata across each active and corresponding pooled placebo  
571 group and across study arms at the end of each block. Placebos that match the route (e.g.,  
572 intravenous vs oral) and frequency of the corresponding active agent further ensure patient and  
573 assessor blinding. Which study arm the participant enters will be known to the research sites and  
574 the participants, but assignment to active versus placebo will be blinded. The randomized  
575 assignment, concealed from the research team, will be transmitted to the site pharmacy who will  
576 provide study medication. The participant, treating clinicians, study personnel (other than the  
577 investigational pharmacist, medical monitor, and the unblinded statistician who prepares closed  
578 session DSMB reports), and outcome assessors will all remain blinded to group assignment until  
579 after the database is locked and blinded analysis is completed. The medical monitor will remain  
580 blinded except as required for individual patient safety. In cases in which unblinding of the medical  
581 monitor is required for individual patient safety, assessment of adverse events by the medical  
582 monitor will be performed prior to unblinding. After assessing adverse events, the medical monitor  
583 will communicate directly with Coordinating Center to receive the unblinded group assignment  
584 needed to inform individual patient safety. The medical monitor will not discuss any unblinded  
585 information with blinded trial personnel. If an additional adverse event occurs for a patient for whom  
586 the medical monitor has been unblinded for individual patient safety, an alternate medical monitor  
587 will be appointed to review the adverse event and determine seriousness, severity, and  
588 relatedness.

589

## 590 **6.8 Vulnerable Subjects**

591 Prisoners will not be enrolled due to difficulty obtaining follow-up for the primary outcome after  
592 hospital discharge. Children will not be enrolled because children typically do not display symptoms  
593 associated with COVID-19 and therefore are less likely to be hospitalized (the setting in which this  
594 study will be conducted). Pregnant women will not be enrolled due to potential teratogenicity of the  
595 investigational agents.

596 This trial may include participants who have no capacity to consent but for whom a LAR may  
597 provide consent. Patients without the capacity to consent for themselves will have a potential for  
598 direct benefit by participating in the trial. Capacity assessment will be conducted by the treating  
599 physician based on the standard clinical assessment of capacity and communicated to the study  
600 team. When a participant lacks capacity at enrollment, consent will be obtained from the LAR  
601 before any study related procedures begin. Participants' capacity will be monitored throughout the  
602 study by working with the treatment team. If the participant regains the capacity to consent, they will  
603 be approached for reconsent, including being informed of their participation in the study and having  
604 an opportunity to withdraw from further participation in the study. Consent from a LAR for persons  
605 lacking decision-making capacity will conform to local legal requirements.

## 606 **6.9 Strategies for Recruitment and Retention**

607 Listings of patients admitted to the participating sites with COVID-19 may be reviewed for eligibility  
608 by the study team, to identify and recruit potential participants, until study enrollment goals have  
609 been met. Participant recruitment will be by direct communication between the inpatient care team  
610 and the study team, allowing the treating team the option to advise of any conditions that would  
611 preclude any individual patient being approached.

## 612 **6.10 Duration of Study Participation**

613 Duration of study participation is for 90 days from randomization.

**6.11 Participant Withdrawal or Termination****6.11.1 Reasons for Withdrawal or Termination**

Participants are free to withdraw from participation in the study at any time upon request. If the nature of treatment makes immediate withdrawal unsafe, withdrawal may be tapered.

An investigator may terminate participation in the study if any situation occurs such that continued participation in the study would not be in the best interest of the participant or the integrity of the study.

Discontinuation of a study agent, regardless of the reason, e.g., patient or physician request, or adverse event, does not constitute study withdrawal. Patient data will still be collected as planned and analyzed as intention to treat unless the participant withdraws consent for continued follow-up.

**6.11.2 Premature Termination or Suspension**

The platform, or any arm of the study, may be temporarily suspended or prematurely terminated if there is sufficient reasonable cause. Circumstances outside of interim analyses that may warrant termination or suspension include, but are not limited to:

- Determination of unexpected, significant, or unacceptable risk to participants in a strategy, such as excess mortality or serious adverse treatment effects
- Insufficient compliance to protocol requirements
- Insufficient accrual in a study arm

If the platform stops for safety, noncompliance, or data quality, it may resume once such concerns about safety, protocol compliance, or data quality are addressed and satisfy the requirements of appropriate oversight bodies including but not limited to the sIRB, the DSMB, and the FDA.

Decisions to stop a study arm or the platform based on the accruing data are not considered premature termination or suspension. They will be guided by the decision thresholds described in the statistical analysis plan and augmented by details in relevant Appendices. Such decisions will generally be weighed by the DSMB. Reasons for stopping based upon the data will include safety (DSMB review of AEs) or demonstration of inferiority or futility.

**7 Study Procedures and Schedule****7.1 Study interventions**

Study agents are described in the agent-specific appendices.

A summary of the trial's schedule of events is listed in Section 7.7 and included in Table 1 (following section 7.7).

Timing of study procedures is based on the day and time of randomization, which sets Day 0 and Time 0. The primary outcome will be assessed on Study Day 28 or at the time of death.

Study medications will be administered by clinical or research personnel while the patient is hospitalized. The first dose of study medication will be administered within 6 hours of randomization. In the hospital, medication delivery after the first dose will correspond to the timing of other scheduled medication delivery for the hospital/unit when possible. If the patient is discharged, the study medication will be stopped unless the oral study medication is planned to be continued in the outpatient setting.

On Study Days 0-4, study personnel will review patient records to confirm administration of study drug and document the number and reason for any missed doses. Research personnel will also

657 assess patients daily during hospitalization for up to 28 days post-randomization. If the participant is  
658 discharged before the full 28-day period, data will be collected according to a set schedule (Day 1,  
659 3, 7, 14, 21, and 28 post-randomization) beginning at the next corresponding day post-discharge.  
660 This includes data regarding oral study medication administration in those subjects who are  
661 randomized to arms with oral study medication. These assessments may be completed by phone or  
662 electronically (email, text, or survey link) if the patient has been discharged from the hospital.  
663 Patients in the fostamatinib arm could require an in-person visit depending on their clinical profile at  
664 the time of discharge. This is further defined in Appendix F. At day 60 we will collect AEs, the WHO  
665 8-point ordinal scale and assess vital status. A final contact will be made at day 90 to assess vital  
666 status.

## 667 **7.2 Expedited Critical and Major Event Reporting**

668 All efficacy and safety outcome events will be assessed and documented in the patients' study  
669 records as outlined in section 13. Events meeting the DSMB-specified *expedited reporting* criteria  
670 must be reported immediately to the coordinating center and no later than 24 hours from knowledge  
671 of occurrence. Standing SOPs applicable to all sub studies will guide the reporting of adverse  
672 events to ensure they are assessed quickly and are submitted to the DSMB, IRB(s), sponsor and  
673 other groups as needed (e.g., FDA). All participating sites will also be expected to comply with any  
674 local requirements for reporting.

## 675 **7.3 Data and Safety Monitoring Plan**

676 *[The data and safety monitoring plan (DSMP) is described briefly in Appendix B and in detail in a*  
677 *separate DSMP document.]*

## 678 **7.4 Biological specimens**

679 Participants in this Master Protocol are expected to contribute biological specimens for discovery.  
680 The biological specimens to be collected, including collection times, processing requirements, and  
681 storage and shipping, are described in Appendix C, and any additions to this minimum specimen  
682 collection will be described in relevant appendices.

## 683 **7.5 Shared placebo group dose, duration and route of administration**

684 Each active agent will have a matching placebo. Placebo formulations are described in the  
685 appendices for each agent.

## 686 **7.6 Co-Interventions and Co-enrollment**

687 This trial will control the use of study medications (active and control) during the treatment window.  
688 Study arm specific medication contraindications are explained in detail in the study arm specific  
689 Appendices. All other treatment decisions will be made by treating clinicians without influence from  
690 the protocol. The decision to administer antiviral medications, including remdesivir or convalescent  
691 plasma, or immunomodulating medications, including corticosteroids, will be made by treating  
692 clinicians and will be recorded in the case report form. We expect usual care to evolve as the study  
693 progresses, and this will be defined by the most recent available evidence and local drug supply.

694 Sponsor and/or protocol leadership may, based upon convincing new evidence, act in the interest  
695 of participant protection, and in avoidance of confounding, to exclude/dis-allow use of any specific  
696 concomitant therapy found to be reasonably contraindicated for a well-defined portion of the study  
697 population. Such a determination may be made, communicated, and implemented by a Protocol  
698 Clarification Memo until it is reasonable to amend the protocol for other reasons.

ACTIV-4 Host Tissue

Protocol Version: 1.8 dated 2021.12.17.

699 Participants will be asked at screening to agree to refrain from participation in other clinical trials  
700 until at least the assessment at Day 90 except for trials comparing different approaches for  
701 implementing SOC interventions or those approved by trial leadership.

702 Co-enrollment in other trials will only be allowed where a co-enrolling trial has been approved by  
703 trial leadership. We will consider several principles when considering co-enrollment in the Master  
704 Protocol.

705 1) This will only apply to clinical trials where there is open label enrollment to facilitate interim and  
706 final analyses of data for this trial, including treatment interactions, and the attribution of causality of  
707 serious adverse events and unanticipated problems.

708 2) Co-enrollment will not be permitted with trials involving medications with contraindications to co-  
709 administration with any study drug for which the participant is eligible. This review and consideration  
710 will be similar to consideration of concomitant medications. This assessment will occur prior to  
711 randomization in the ACTIV 4 Host Tissue platform. This ensures there are no specific drug-drug  
712 interactions in the event the patient is receiving active therapy in the assigned arm.

713 3) Trials involving medications impacting the RAAS pathway will not be considered.

714 4) Study procedures for the co-enrolling trial will be considered secondary to the procedures for the  
715 RAAS MP. We will aim to collect the primary and key secondary outcomes for the co-enrolling trial  
716 but consider the overall participant burden when fulfilling trial procedures for the co-enrolling trial  
717 such as additional blood draws and participant assessments.

718 5) Co-enrollment prior to randomization will be documented. The impact of co-enrollment on the  
719 effects of active agents versus placebo on the primary outcome (i.e., heterogeneity of treatment  
720 effect) will be examined as a supplementary analysis.

721 We aim to co-enroll with the ACTIV-4a trial only, an open-label randomized trial now studying the  
722 impact of dapagliflozin and crizanlizumab on top of usual care. Patients will be randomized in  
723 ACTIV-4a to one of these medications at a time in an open label fashion. There are no drug-drug  
724 interactions with our platform agents. Patients who receive both dapagliflozin and fostamatinib need  
725 to be monitored for volume depletion. Dapagliflozin can cause an osmotic diuresis and patients on  
726 fostamatinib may develop diarrhea. Based on the anticipated overlap in sites, similarity in inclusion  
727 and exclusion criteria, and willingness of patients to co-enroll in other ACTIV studies, we expect  
728 less than 5% of patients will be co-enrolled in ACTIV-4a.

## 729 **7.7 On study monitoring**

730 All patients will be hospitalized at the time they are enrolled in the study and will therefore receive  
731 monitoring as a part of routine clinical care, including monitoring by their physicians, nurses,  
732 respiratory therapists, and ancillary staff. Clinical and laboratory data obtained as part of routine  
733 clinical monitoring will be collected. Those labs required to evaluate secondary and safety  
734 outcomes that are not collected as part of usual care will be obtained for the purpose of the study  
735 protocol as outlined in section 7.7.6.

### 736 **7.7.1 Laboratory evaluations**

737 Routine clinical monitoring will follow laboratory results when measured as part of usual care which  
738 may include daily complete blood count (CBC), renal function (creatinine/eGFR), electrolytes, D-  
739 dimer, CRP, and measures of coagulation (PT/PTT/INR). If renal function and electrolytes are not  
740 measured as part of routine care, they will be collected daily for study purposes in all arms. In the  
741 fostamatinib arm a daily CBC and liver function tests will also be performed while in the hospital on  
742 study drug.



ACTIV-4 Host Tissue  
Protocol Version: 1.8 dated 2021.12.17.

743 **7.7.2 Clinical evaluations**

744 Between randomization and hospital discharge or end of study drug, study personnel will review the  
745 electronic health record daily for potential medication interactions with the host tissue agents being  
746 studied (see Appendices D, E, F and G). If a medication considered to be contraindicated with the  
747 host tissue agent is discovered, treating clinicians will be contacted to discuss if stopping study drug  
748 is appropriate or if the medication in question can be stopped or substituted. Those medications in  
749 the fostamatinib arm with absolute contraindications (Appendix F) will be held or study drug  
750 stopped. When there are relative contraindications treating clinicians will determine whether an  
751 alternative medication would be appropriate or whether the risk-benefit ratio favors continuing the  
752 medication with the known potential interaction.

753 **7.7.3 Criteria for stopping drug**

754 Criteria for holding/stopping each trial drug are contained in the trial specific appendices  
755 (appendices D, E, F).

756  
757 To delineate reasons for study drug discontinuation, if study drug is discontinued the study team will  
758 be prompted to indicate why it was discontinued. There will be 3 options to choose from:

- 759
- 760 1. Logistical - i.e. loss of IV access, CT scan, transport, etc. – no AE reporting/recording  
761 required
  - 762 2. Clinical events that did not represent an AE – i.e., Fostamatinib stopped due to starting  
763 contraindicated medication – no AE reporting/recording
  - 764 3. Due to a possible AE or PSESE –study team directed to go to PSESE or AE reporting page  
765 in electronic data capture form
- 766

767 **7.7.4 Plan for drug shortages**

768 In the event of a shortage of study drug at a participating trial site, the trial arm will be suspended at  
769 that site, but the platform trial will continue.

770 **7.7.5 Baseline variable collection**

771 Baseline is defined as the patient's status at randomization. Physiological measurements and  
772 laboratory results obtained in the 24 hours prior to randomization may contribute to baseline data.  
773 The baseline study-specific blood draws may be completed at any time between consent and the  
774 first dose of study medication. The following information will be obtained to reflect the patient's  
775 baseline status:

- 776 1. Confirmation of informed consent for trial participation
- 777 2. Confirmation of inclusion/exclusion eligibility criteria for trial participation
- 778 3. Confirmation of the participant not being pregnant, including a study-dedicated pregnancy  
779 test for women of childbearing potential who have not had a clinically obtained negative  
780 pregnancy test during this hospitalization.
- 781 4. Admission data: date and time of presentation, origin (home, skilled nursing facility,  
782 rehabilitation/long-term-acute care hospital, nursing home, outside hospital, outside ICU),  
783 location at enrollment (ED, hospital ward, ICU)
- 784 5. Sociodemographics (such as age, sex, race, ethnicity, height, weight, poverty index)
- 785 6. Study-specific blood draws (AngII, Ang(1-7), Plasma renin activity, ACE and ACE2,  
786 NTproBNP and Troponin) as indicated for each investigational agent in the Ancillary  
787 Biomarker Appendix (Appendix C).
- 788 7. Comorbidities such as: AIDS, Leukemia, Malignant Lymphoma, Hemiplegia,  
789 Cerebrovascular Disease, Prior Myocardial Infarction, Congestive Heart Failure, Peripheral

- 790 Vascular Disease, Dementia, COPD, Connective Tissue Disease, Peptic Ulcer Disease,  
 791 History of Hypertension, HIV positive (without AIDS), Alcoholism, Coronary Artery Disease,  
 792 Solid Tumor, Liver Disease, Diabetes Mellitus, Chronic Kidney Disease  
 793 8. Acute signs and symptoms such as: altered mental status, acute hypoxemic respiratory  
 794 failure, liver function tests, renal function, coagulation studies, chest imaging results  
 795 9. Sequential Organ Failure Assessment (SOFA)  
 796 10. Chronic use of medications, such as: corticosteroids, ACE inhibitors, angiotensin receptor  
 797 blockers, non-steroids anti-inflammatory drugs, others  
 798 11. Receipt of antiviral medications between hospital presentation and randomization:  
 799 chloroquine, hydroxychloroquine, remdesivir, lopinavir/ritonavir, others  
 800 12. Receipt of immunomodulators between hospital presentation and randomization:  
 801 corticosteroids, tocilizumab, sarilumab, interferon  $\beta$ , others  
 802 13. Receipt of anticoagulation and anti-platelet agents between hospital presentation and  
 803 randomization  
 804 14. COVID-19 vaccination status  
 805 15. Receipt of COVID-19 convalescent plasma between hospital presentation and  
 806 randomization  
 807 16. Receipt of anti-SARS-CoV-2 monoclonal antibodies between hospitalization and  
 808 randomization  
 809 17. Receipt of invasive mechanical ventilation, non-invasive ventilation, high-flow nasal cannula,  
 810 vasopressors, and oxygen therapy at randomization  
 811 18. Vital signs

#### 812 **7.7.6 Assessments between hospital presentation and hospital discharge**

- 813 1. On days of study medication administration (before study administration in those arms  
 814 where study drug is not an infusion)  
 815 a. Adverse events of any grade severity present prior to the infusion or medication  
 816 administration  
 817 b. Start and stop (or administration time if oral) times of the infusion of the  
 818 investigational agent/placebo- and restart time if medication stopped for hypotension  
 819 c. Starting dose of study medication administration  
 820 d. New adverse events of grade 3-4 severity during and after study medication  
 821 administration  
 822 2. Recording of specifics of study treatment according to assigned arm  
 823 3. Daily laboratory assessments as part of routine clinical care (CBC, BMP, LFTs, PT/PTT/INR,  
 824 D-dimer and CRP).  
 825 4. Daily vital signs (including blood pressure), secondary outcomes and safety assessments. In  
 826 the fostamatinib arm a daily CBC and liver function tests will also be performed.  
 827 5. Study-specific blood draws (AngII, Ang(1-7), Plasma renin activity, NT-ProBNP and  
 828 Troponin) as indicated for each investigational agent in the Ancillary Biomarker Appendix  
 829 (Appendix C).  
 830 6. Targeted concomitant medications administered daily in the hospital including remdesivir,  
 831 Corticosteroids, antiplatelet/anticoagulation, convalescent plasma, monoclonal Ab's,  
 832 antibacterial agents, antiviral agents against SARS-CoV-2, ACEI's, ARBs, beta blockers.  
 833 7. Date and time of first receipt of supplemental oxygen, high-flow nasal cannula, non-invasive  
 834 ventilation, invasive mechanical ventilation, vasopressors, and extracorporeal membrane  
 835 oxygenation (if applicable)  
 836 8. Date and time of final receipt of supplemental oxygen, high-flow nasal cannula, non-invasive  
 837 ventilation, invasive mechanical ventilation, vasopressors and extracorporeal membrane  
 838 oxygenation (if applicable)

ACTIV-4 Host Tissue

Protocol Version: 1.8 dated 2021.12.17.

- 839 9. Pulmonary embolism, systemic arterial thromboembolism, myocardial infarction, or ischemic
- 840 stroke at hospital discharge or 28 days, whichever occurs first
- 841 10. Date and time of first ICU admission
- 842 11. Date and time of final ICU discharge
- 843 12. Data and time of hospital discharge
- 844

#### 845 **7.7.7 Assessments following hospital discharge**

846 Patients will be followed through 90 days following randomization. The following data will be  
847 collected:

- 848 1. Number and reason for missed doses of study drug (only for those discharged prior to
- 849 completing study drug if applicable)
- 850 2. Date of death (if applicable) through day 90
- 851 3. ED visits, hospital readmissions, and use of supplemental oxygen, HFNC, NIV, IMV or
- 852 ECMO after hospital discharge through day 60
- 853 4. Safety outcomes (section 5.3.4) after hospital discharge and adverse events as defined in
- 854 the drug specific appendices and Section 13 at day 28 and day 60 (or if discharged earlier
- 855 as outlined in section 7.1)
- 856 5. New or worsening symptoms not previously present at day 28 and day 60 (or if discharged
- 857 earlier as outlined in section 7.1) including fever, chills, cough, chest pain, dyspnea,
- 858 headache, sore throat, congestion, runny nose, fatigue, body aches
- 859
- 860
- 861
- 862
- 863
- 864
- 865
- 866
- 867
- 868
- 869
- 870
- 871
- 872
- 873
- 874
- 875
- 876
- 877
- 878
- 879
- 880
- 881
- 882
- 883
- 884
- 885
- 886

ACTIV-4 Host Tissue  
Protocol Version: 1.8 dated 2021.12.17.

887  
888  
889  
890  
891  
892

| Table 1. Schedule of Events                                                                                                             |                                |                                                            |                |           |           |
|-----------------------------------------------------------------------------------------------------------------------------------------|--------------------------------|------------------------------------------------------------|----------------|-----------|-----------|
| Event                                                                                                                                   | Baseline & Randomization Day 0 | Day 1 – Day 28 <sup>1</sup>                                | Discharge      | Day 60    | Day 90    |
| Visit Windows                                                                                                                           |                                | Day 7 and 14 + 1 Day<br>Day 21 + 2 Days<br>Day 21 + 5 Days |                | + 10 Days | + 14 Days |
| Confirm eligibility                                                                                                                     | X                              |                                                            |                |           |           |
| Obtain informed consent                                                                                                                 | X                              |                                                            |                |           |           |
| Screen by reviewing medical history and EMR                                                                                             | X                              |                                                            |                |           |           |
| Pregnancy test <sup>2,3</sup>                                                                                                           | X                              |                                                            |                |           |           |
| Randomization                                                                                                                           | X                              |                                                            |                |           |           |
| Concomitant medications                                                                                                                 | X <sup>4</sup>                 | X <sup>7</sup>                                             |                |           |           |
| Record results of SOC laboratory assessments                                                                                            | X <sup>4</sup>                 | X                                                          |                |           |           |
| Study-specific blood draws <sup>5</sup> <ul style="list-style-type: none"> <li>CBC with diff and LFTs in fostamatinib arm</li> </ul>    | X <sup>4</sup>                 | X <sup>7</sup>                                             |                |           |           |
| Study-specific biological specimen collection <sup>6</sup> <ul style="list-style-type: none"> <li>EDTA plasma</li> <li>Serum</li> </ul> | X <sup>4</sup>                 | X                                                          |                |           |           |
| Respiratory failure free days, oxygen free days and hospital free days                                                                  | X <sup>4</sup>                 | X                                                          | X <sup>7</sup> |           |           |
| WHO Ordinal Scale                                                                                                                       | X                              | X                                                          |                | X         |           |
| Mortality                                                                                                                               | X                              | X                                                          | X              | X         | X         |
| Sequential Organ Failure Assessment score                                                                                               | X                              |                                                            |                |           |           |
| Initiate treatment <sup>8</sup>                                                                                                         | X                              |                                                            |                |           |           |
| Continue study medication treatment                                                                                                     |                                | X                                                          |                |           |           |
| Adverse event monitoring                                                                                                                | X                              | X <sup>7</sup>                                             |                | X         |           |
| Record discharge disposition                                                                                                            |                                |                                                            | X              |           |           |

<sup>1</sup> Perform events daily through day 28 or discharge, whichever occurs first. Only perform if patient is hospitalized.

<sup>2</sup> Perform for all women of childbearing potential.

<sup>3</sup> Perform only if not completed for current admission.

<sup>4</sup> Perform prior to treatment administration

<sup>5</sup> Only if not performed as part of usual care – performed daily while on study drug

<sup>6</sup> Coordinate with clinical lab draws when possible- as delineated in Appendix C

<sup>7</sup> Collect at Day 1, 3, 7, 14, 21, and 28 post-randomization if patient is discharged before 28 days. In the fostamatinib arm repeat CBC, LFTs and BP check may be necessary depending on values at discharge as indicated in Appendix F

<sup>8</sup> Administration route and timing/frequency is treatment specific

**893 8 Statistical Considerations**

894 This section describes the statistical approach for each comparison of active treatment versus its  
895 concurrent and eligibility matched placebo comparator group.

**896 8.1 Statistical and Analytical Plans**

897 There will be a formal Statistical Analysis Plan (SAP) that will be updated when an arm is added to  
898 the platform and when any arm is dropped from the platform. This SAP will provide detailed  
899 descriptions of all primary, secondary, and sensitivity analyses, all interim and final decision  
900 thresholds, and all required documentation to ensure the reproducibility of statistical analyses. The  
901 SAP will be finalized prior to the first interim analysis for the platform, and arm-specific SAP  
902 amendments (if required) will occur before the first interim analysis involving that arm. The finalized  
903 SAP will take precedence and override the statistical considerations described in this section of the  
904 master protocol (i.e., Statistical Considerations).

**905 8.2 Analysis Datasets**

906 All sub studies conducted under this protocol will use a modified intention-to-treat (mITT) approach  
907 for primary analyses. The mITT analysis dataset (i.e., the “full analysis set”) will include all  
908 randomized participants according to the treatment assigned at randomization regardless of  
909 subsequent compliance or protocol violations, with the following exceptions: Participants who do not  
910 receive study drug will be excluded from the mITT analysis dataset. Those patients who were  
911 randomized and found to be ineligible will be excluded from the mITT analysis dataset. The safety  
912 analysis dataset will be produced, which will consist of all participants who received at least one  
913 dose of study medication grouped by the drug received. No statistical hypothesis tests nor other  
914 statistical inferences will be made using the safety analysis dataset unless requested by the DSMB.

915 Per protocol analyses will not be routinely performed but may be conducted as sensitivity analyses  
916 to support the mITT analysis. A key monitoring data point is the count of participants who are  
917 randomized and included in the ITT dataset but have not received study drug. We expect this to be  
918 less than 5% among participants who have completed the study. If this becomes greater than 5%  
919 during the trial, study leadership will meet with study teams to explore and mitigate this issue and  
920 will ensure the number of patients who receive study drug meets the original enrollment goals. We  
921 will report results for both the mITT (primary) and ITT datasets.

**922 8.3 Statistical Modeling**

923 The effect of each study agent versus matching placebo will be quantified using an odds ratio. The  
924 odds ratio represents the treatment effect on the odds of greater values of the primary outcome  
925 (i.e., improved lung function through 28 days, as measured by oxygen-free days). Based on the  
926 behavior of similar outcomes in prior trials,<sup>35–39</sup> we anticipate the distribution of the primary outcome  
927 to be irregular, with peaks around -1 to 0 and between 22 and 28 days. Thus, we will use a flexible  
928 semi-parametric approach for the primary outcome analysis. Estimation and inferences about the  
929 odds ratio will be made using Bayesian proportional odds (PO) logistic regression methods.<sup>42,43</sup> For  
930 each study agent, the comparator group will consist of participants concurrently randomized to  
931 receive placebo who also meet the inclusion and exclusion criteria for that agent.

932 The general form of the PO model can be written in terms of the covariates  $X$  and an outcome  
933 variable  $Y$ , where probabilities of outcome value  $y$  or greater  $\Pr(Y \geq y|X) = \text{expit}(\alpha_y + X\beta)$  where  
934  $\alpha_y$  is the intercept for outcome value  $y$  and  $\text{expit}$  is the logistic (inverse logit) transformation and  $X$   
935 contains baseline covariates and treatment.  $\beta$  represents the log odds ratio (OR) associated with

936 the effects of covariates and group assignment. Specifically, the odds ratio represents the relative  
937 effect of treatment versus placebo on the odds  $\Pr(Y \geq y|X)/(1 - \Pr(Y \geq y|X))$ , for any value  $y$ .

#### 938 **8.4 Loss to Follow-up, Censoring, and Intercurrent Events**

939 Participants who withdraw consent prior to data collection, or for whom there is no partial  
940 information about the primary outcome, will not be excluded from analysis. We will strive to avoid  
941 loss to follow-up by making repeated attempts to contact participants or otherwise retrieve  
942 participant records. If loss-to-follow-up cannot be avoided, and the information needed to compute  
943 the primary endpoint is partially known (i.e., censored), we will use likelihood-based methods to  
944 account for this censoring. For example, if a study participant received supplemental oxygen every  
945 day during a 10-day period after randomization, but is then lost to follow-up, the primary outcome is  
946 only partially known (i.e., OFDs  $\leq 18$  in this example). The PO model provides a convenient  
947 mechanism to account for this and other types of censoring using a likelihood-based approach.<sup>44</sup>  
948 For observations that are fully observed, the log likelihood contribution is  $l(\alpha, \beta; y, x) = \log \Pr(Y =$   
949  $y|X = x)$ . For observations that are left censored at  $y$  (e.g.,  $\leq 18$  OFDs) observations, the log  
950 likelihood contribution is  $l(\alpha, \beta; y, x) = \log \Pr(Y \leq y|X = x)$ . The latter is conveniently computed by  
951 substituting  $1 - \text{expit}(\alpha_y + x\beta)$ . Censored observations on the primary outcome due to loss of  
952 follow-up, including observations that are censored with respect to both oxygen requirement and  
953 mortality, will be handled using this mechanism.

954  
955 All primary analyses will be implemented using the mITT analysis dataset as described above (see  
956 *Analysis Datasets*). The intercurrent event of death will be coded as a special value in the primary  
957 outcome (i.e., composite strategy). Censoring in the primary outcome will be modeled using the  
958 likelihood method described above. No other intercurrent events will affect the primary outcome  
959 assessment (i.e., treatment policy strategy).<sup>45</sup>

#### 960 **8.5 Model Prior and Bayesian Computation**

961 A flat prior distribution will be used for all PO model parameters. This ensures that the estimate of the  
962 primary estimand will be free of influence from an informative prior, and the Bayesian estimate will be  
963 identical to the maximum likelihood estimate. The posterior distribution for the log odds ratio will be  
964 approximated using the Laplace method.<sup>46</sup> Use of a flat prior ensures the Laplace-approximated  
965 posterior distribution is identical to the asymptotic sampling distribution of the maximum likelihood  
966 estimate; in both cases a normal distribution centered at the estimate with variance-covariance equal  
967 to the inverse Hessian of the log likelihood function. All statistical inferences about the odds ratio will  
968 be made using this method. Statistical uncertainty about supplementary estimands (e.g., treatment  
969 difference in the median of the primary outcome) will be quantified using the delta method.<sup>47</sup> We feel  
970 there is insufficient information, specific to the study agents and primary outcome, upon which to  
971 justify a more informative prior. The flat prior approach ensures that Bayesian inferences regarding  
972 the efficacy of study agents are based exclusively on the data collected in the ACTIV-4 Host Tissue  
973 trial.

#### 974 **8.6 Analysis of Primary Outcome**

##### 975 **8.6.1 Primary Analysis**

976 The effect of each study agent versus matching placebo will be quantified using an odds ratio,  
977 which quantifies the treatment effect on the odds of greater values of the primary outcome.  
978 Estimation and inference about the primary estimand (and supplementary estimands) will be  
979 implemented using Bayesian PO logistic regression methods, adjusting for the active drug vs

980 placebo indicator variable, age, sex, baseline WHO COVID Ordinal Outcome score, and baseline  
981 Sequential Organ Failure Assessment score. Evidence for efficacy will be quantified using the  
982 posterior probability that the active agent versus placebo odds ratio is greater than one (i.e.,  
983 treatment is associated with greater oxygen free days at day 28). This is denoted the “posterior  
984 probability for efficacy” or  $P(OR > 1|Data)$ , where OR represents the odds ratio, and Data represents  
985 the available outcome data. The posterior probability for inferiority/harm is defined as  
986  $P(OR \leq 1|Data)$ . The primary analysis will be implemented separately for each study agent, where  
987 the matching placebo group will consist of concurrently randomized participants meeting the  
988 inclusion and exclusion criteria for that agent. The primary and supplementary estimands will be  
989 presented with 95% credible intervals. While we do not anticipate missing covariate data, if missing  
990 covariate data occurs, then Bayesian imputation methods will be used to estimate the posterior  
991 probabilities required for interim and final analyses.

992

### 993 **8.6.2 Planned Interim Analyses, Early Stopping, and Type-I Error Control**

994 At the final analysis (only) for each arm, efficacy will be indicated if the posterior probability for  
995 efficacy exceeds a common threshold. For studies under this master protocol, the efficacy threshold  
996 will be selected using statistical simulation to ensure a type-I error probability of 2.5% for each study  
997 agent. Two planned interim analyses will occur at 33% and 66% of maximum enrollment for each  
998 arm. At least 33% and 66% of participants in both the active and placebo comparator group must  
999 have completed follow-up to day 28, or were deceased, withdrawn, or lost to follow-up at day 28,  
1000 and whose records are query-free, prior to the first and second interim analyses, respectively. At  
1001 each interim analysis, the trial may be stopped early for inferiority/harm or futility. The trial will be  
1002 stopped early for inferiority/harm if the posterior probability for inferiority exceeds a threshold  
1003 selected to ensure less than 1% chance of (incorrectly) stopping early for inferiority/harm under the  
1004 null hypothesis. This ensures a less than 1% chance of incorrectly stopping early for inferiority/harm  
1005 when the treatment is efficacious, and greater than 1% chance of stopping early when the treatment  
1006 is inferior/harmful. The efficacy and inferiority thresholds will be identified prior to the first interim  
1007 analysis using statistical simulations under the null hypothesis (see *Sample Size*) to ensure the  
1008 study operating characteristics achieve design specifications with a small simulation margin of error.

1009

1010 The trial will be stopped early for futility if the probability of meeting the efficacy criterion at the final  
1011 analysis is less than 1%. At each interim analysis, the probability of meeting the efficacy criterion at  
1012 the final analysis will be computed using a conditional power method; using repeated simulation of  
1013 the remaining outcome data, assuming that the effect of active drug versus placebo is equal to the  
1014 minimum detectable effect with 85% power (MDE85; see *Sample Size*).

1015

1016 Prior to the first interim analysis, once 100 participants have completed follow-up to day 28, or were  
1017 deceased, withdrawn, or lost to follow-up at day 28, and whose records are query-free, and before  
1018 any comparative outcome data are reviewed by the DSMB, sample size adequacy will be re-  
1019 assessed based on the pooled (across all active and placebo arms) distribution of the primary  
1020 outcome. Sample size re-estimation will be performed by the blinded statistician, using pooled and  
1021 blinded data. These data will be used to compute the empirical distribution of the primary outcome,  
1022 which will then be used as the basis for reimplementing power simulations (see *Sample Size*). The  
1023 maximum sample size (or closest increment of 50 participants per arm, but not exceeding 100  
1024 additional participants per arm) required to achieve 85% power at the planned MDE85 will be  
1025 computed. The blinded statistician will discuss the results of this analysis with the study team and  
1026 sponsor, who will then determine whether an adjustment to the maximum sample size should be  
1027 made. If the maximum sample size per arm is adjusted prior to the first interim analysis, this  
1028 modification will apply uniformly to all study arms, and the efficacy and inferiority thresholds will be

1029 recomputed to ensure a 2.5% type-I error rate regarding the assessment of efficacy, and <1%  
1030 chance of incorrectly stopping early for inferiority. Regardless of sample size adjustments, interim  
1031 analyses will be conducted at 33% and 66% of maximum enrollment, separately for each arm.  
1032

### 1033 8.6.3 Supplementary Efficacy Estimands

1034 The PO model is attractive for the analysis of ordinal and quantitative response variables, such as  
1035 the primary outcome, because they directly model the cumulative distribution function from which  
1036 the mean, median, other percentiles, and cumulative probabilities of the primary outcome, stratified  
1037 by treatment group, are easily derived.<sup>48</sup> In addition to the odds ratio, the effects of treatment versus  
1038 placebo will be quantified using the difference in mean, difference in median, and differences in  
1039 clinically relevant proportions associated with the primary outcome (e.g., mortality at day 28:  
1040  $\Pr(Y = -1|X)$ , and oxygen requirement every day until day 28:  $\Pr(Y = 0|X)$ ). These important and  
1041 clinically meaningful supplementary estimands will be used to describe and communicate the  
1042 treatment effect. The posterior distribution for each of the supplementary estimands is readily  
1043 computed using standard Bayesian methods.  
1044

### 1045 8.6.4 Sensitivity and Supplementary Analyses

1046 The *proportional odds assumption* of the PO model specifies that the effect of treatment on the  
1047 odds that  $Y \geq 3$  (measured as an odds ratio versus placebo) is the same relative effect as for  $Y \geq 4$ .  
1048 However, even when the PO assumption is strongly violated, the estimated OR remains a simple  
1049 function of the Wilcoxon-Mann-Whitney U-statistic, namely the probability that a randomly chosen  
1050 patient on treatment B has a higher response than a randomly chosen patient on treatment A,<sup>49</sup> the  
1051 *probability index* or *concordance probability*. Thus, statistical inferences based on the odds ratio, as  
1052 estimated using the PO model, are robust to violations of the PO assumption and provide a  
1053 reasonable global assessment of treatment effectiveness. However, derived quantities such as the  
1054 difference in means may be more sensitive to violations of the PO assumption. To assess the  
1055 robustness of inferences about the primary and supplementary estimands, with respect to the PO  
1056 assumption, we will relax this assumption using the *partial PO model*<sup>46</sup> in a planned sensitivity  
1057 analysis. In addition, deviations from proportional odds will be examined by separately estimating  
1058 the odds ratio for each possible dichotomization (that preserves ordering) of the primary outcome  
1059 (e.g., alive versus dead at day 28, alive and oxygen free for at least 10 days at day 28 versus alive  
1060 and oxygen free for fewer than 10 days or dead at day 28, etc.).  
1061

1062 Analysis of censored or missing outcome data requires assumptions regarding the mechanism by  
1063 which censoring and missing values arise. The likelihood method described above, and other  
1064 similar methods such as multiple imputation assume that missing values occur at random (i.e.,  
1065 missing at random or MAR). However, because censored and missing values cannot be observed,  
1066 assumptions about the missingness mechanism are not verifiable. In order to assess the sensitivity  
1067 of study findings to violations of this assumption, we will conduct additional sensitivity analyses by  
1068 reproducing the primary analysis under alternative assumptions regarding the mechanism for  
1069 missing values. Specifically, we will perform tipping point analyses that vary assumptions about the  
1070 missing outcomes on the two treatment arms separately. These analyses will consider scenarios  
1071 where dropouts on drug tend to have worse outcomes than dropouts on placebo. The goal of these  
1072 analyses is to explore the plausibility of missing data assumptions under which there is no longer  
1073 evidence of efficacy.  
1074

1075 Co-enrollment in other studies testing COVID-19 therapeutics may occur. Co-enrollment may affect  
1076 the treatment effect estimates if there is effect modification associated with co-enrollment. We  
1077 expect co-enrollment to occur in fewer than 5% of patients enrolled in the trial. However, because



ACTIV-4 Host Tissue  
Protocol Version: 1.8 dated 2021.12.17.

1078 the decision to co-enroll is not affected by the treatment assignment in ACTIV-4 Host Tissue, co-  
1079 enrollment will not favor any particular treatment. In addition, due to its rarity, we expect co-  
1080 enrollment to have little impact on the estimated treatment effects, even when there is effect  
1081 modification. We will evaluate the sensitivity of the treatment effect to co-enrollment status using the  
1082 approach described in the following paragraph.

1083  
1084 Differential treatment effect, also referred to as heterogeneity of treatment effect, refers to  
1085 differences in efficacy as a function of pre-existing patient characteristics such as baseline  
1086 variables. This is often assessed by forming subgroups or using an interaction analysis.  
1087 Supplemental interaction analyses will be implemented to examine the potential for differential  
1088 treatment effect. Differential treatment effect will be examined in strata defined by (but not limited  
1089 to) respiratory support category at enrollment, status of co-enrollment in an open label clinical trial  
1090 of antiplatelet agents (ACTIV-4a), age category, SARS-CoV-2 vaccination status, and passive  
1091 immunity status. Studies under this master protocol will be sized only for assessing efficacy using  
1092 the primary analysis. Thus, there may be inadequate power to examine differential treatment.

### 1094 8.6.5 Sample Size

1095 The maximum number of participants to be enrolled in sub studies under the Master Protocol is 300  
1096 patients per active treatment arm, and 300 patients in the matching placebo arm. The placebo arm  
1097 will be shared across all active treatment arms. Placebo enrollment beyond 300 participants may be  
1098 required to ensure at least 300 concurrently randomized and eligibility-matched placebo participants  
1099 for comparison with each active treatment arm. We expect control arm participants to continue to  
1100 accrue for as long as there are additional treatments to test and cases to enroll. New arms may be  
1101 introduced according to scientific and public health needs.

1102 Prior to the first interim analysis, sample size adequacy will be re-assessed based on the pooled  
1103 (across all active and placebo arms) distribution of the primary outcome. The maximum sample size  
1104 may be increased in order to achieve 85% power at the planned MDE85. If the maximum sample  
1105 size per arm is increased prior to the first interim analysis, the efficacy and inferiority thresholds will  
1106 be recomputed to ensure a 2.5% type-I error rate regarding the assessment of efficacy, and <1%  
1107 chance of incorrectly stopping early for inferiority. Interim analyses for each arm will take place as  
1108 specified previously.

1109  
1110 Pooled and blinded summaries of oxygen-free days at day 28 (where mortality is coded as -1) from  
1111 the ongoing PassItOn (convalescent plasma) trial of patients hospitalized for COVID-19 were used  
1112 to approximate the distribution of the oxygen free days in the placebo group.<sup>40,50</sup> The inclusion and  
1113 exclusion criteria for PassItOn are nearly identical to the current platform (see *Study population and  
1114 enrollment*). Based on PassItOn data, the anticipated frequency distribution, mean, and median of  
1115 oxygen-free days (OFDs) for the placebo group, and for the treatment group under hypothetical  
1116 effect sizes computed using the PO model are displayed in the table below.

1117

| OFDs / Odds Ratio | Placebo | Inferiority |       | Superiority |       |       |       |       |       |       |
|-------------------|---------|-------------|-------|-------------|-------|-------|-------|-------|-------|-------|
|                   |         | 0.67        | 0.80  | 1.40        | 1.45  | 1.50  | 1.55  | 1.60  | 1.65  | 1.70  |
| Mean              | 16.8    | 14.5        | 15.5  | 18.6        | 18.8  | 19.0  | 19.1  | 19.3  | 19.5  | 19.5  |
| Median            | 22      | 19          | 20    | 23          | 23    | 23    | 23    | 23    | 23    | 24    |
| P(OFDs >= 22)     | 0.45    | 0.36        | 0.40  | 0.54        | 0.54  | 0.56  | 0.56  | 0.57  | 0.58  | 0.58  |
| Proportion:       |         |             |       |             |       |       |       |       |       |       |
| -1 (death)        | 0.176   | 0.242       | 0.211 | 0.133       | 0.129 | 0.125 | 0.121 | 0.118 | 0.115 | 0.112 |

| OFDs / Odds Ratio | Placebo | Inferiority |       | Superiority |       |       |       |       |       |       |
|-------------------|---------|-------------|-------|-------------|-------|-------|-------|-------|-------|-------|
|                   |         | 0.67        | 0.80  | 1.40        | 1.45  | 1.50  | 1.55  | 1.60  | 1.65  | 1.70  |
| 0                 | 0.046   | 0.056       | 0.052 | 0.037       | 0.036 | 0.035 | 0.034 | 0.033 | 0.033 | 0.032 |
| 1                 | 0.004   | 0.005       | 0.005 | 0.004       | 0.004 | 0.003 | 0.003 | 0.003 | 0.003 | 0.003 |
| ---               | ---     | ---         | ---   | ---         | ---   | ---   | ---   | ---   | ---   | ---   |
| 27                | 0.041   | 0.030       | 0.034 | 0.053       | 0.054 | 0.056 | 0.057 | 0.058 | 0.060 | 0.061 |
| 28                | 0.084   | 0.058       | 0.068 | 0.114       | 0.117 | 0.121 | 0.124 | 0.128 | 0.131 | 0.135 |

1118

1119 Based on these data and effect size scenarios, a series of statistical simulations were implemented  
 1120 to examine the operating characteristics of the statistical study design described above, including  
 1121 the plan for randomization, interim analysis, and final assessments of efficacy using the odds ratio.  
 1122 In each simulation, participant age and sex were randomly generated, and their effects on the  
 1123 primary outcome were simulated to match the estimated effects of age and sex on the primary  
 1124 outcome among PassItOn trial participants. No other covariates were simulated or adjusted in the  
 1125 simulation. In order to assess the potential impact of attrition, missing or censored observations  
 1126 were simulated in 5% of participants, on average. In the PassItOn trial, fewer than 5% of  
 1127 participants withdrew or were lost to follow-up. To encode attrition, a subset of the simulated study  
 1128 participants was selected at random, each with probability 0.05. The primary outcome for each  
 1129 selected participant was censored on a study day selected uniformly at random between 1 and 28.  
 1130 A weighting method was used to approximate the likelihood method that we intend to use to  
 1131 account for censored values. All simulation analyses, including those associated with interim and  
 1132 final assessment of efficacy, inferiority, and futility, were implemented in a weighted fashion using  
 1133 these weights.

1134 An initial simulation under the null hypothesis was used to select the efficacy and inferiority  
 1135 thresholds. The efficacy and inferiority thresholds were selected as the smallest threshold values  
 1136 that ensure no more than 2.5% type-I error and 1% early stopping for inferiority. In this initial  
 1137 simulation, a large number (5000) of replicates were used to ensure <0.05% simulation margin of  
 1138 error in estimating the type-I error rate and the probability of incorrectly stopping early.  
 1139

1140 For all simulations, the efficacy, inferiority, and futility thresholds were set to 0.975, 0.995, and 0.010,  
 1141 respectively. As described above, the futility threshold was selected to stop for futility when the  
 1142 conditional power falls below 1%. The results of 1000 simulations per scenario are summarized in the  
 1143 table below. In these simulations, the type-I error probability was 2.6%. The frequency of incorrectly  
 1144 stopping early for inferiority under the null was 1.1%. *A maximum sample size of 300 participants per*  
 1145 *arm (and matching placebo) provides over 85% power to detect an odds ratio of 1.55, corresponding*  
 1146 *to a 2.3-day difference in mean OFDs, and a 5.5 percentage point reduction in 28-day mortality.*  
 1147 Differences larger than 2 ventilator-free days on average have been considered clinically important in  
 1148 prior trials.<sup>35-37</sup> *Thus, the minimum detectable effect at 85% power (MDE85) is an odds ratio of 1.55. At*  
 1149 *the MDE85, the frequency of incorrectly stopping early for futility was 0.2%. When the simulated*  
 1150 *treatment was inferior/harmful relative to placebo, at OR=0.67, early stopping occurred in nearly 97%*  
 1151 *(40.6% for inferiority, 56.1% for futility) of simulated trials and the average sample size was 186.9 per*  
 1152 *arm. In order to detect an odds ratio of 1.40, 1.45, or 1.50 with 85% power, the required maximum*  
 1153 *sample size per arm is approximately 510, 392, and 346, respectively.*  
 1154  
 1155

| Null | Inferiority | Superiority |
|------|-------------|-------------|
|------|-------------|-------------|

| <b>OFDs / Odds Ratio</b>  | <b>1.00</b>  | <b>0.67</b> | <b>0.80</b> | <b>1.40</b>  | <b>1.45</b>  | <b>1.50</b>  | <b>1.55</b>  | <b>1.60</b>  | <b>1.65</b>  | <b>1.70</b>  |
|---------------------------|--------------|-------------|-------------|--------------|--------------|--------------|--------------|--------------|--------------|--------------|
| Diff. in Mean             | 0            | -2.28       | -1.27       | 1.82         | 2.02         | 2.22         | 2.34         | 2.54         | 2.68         | 2.80         |
| Diff. in Median           | 0            | -3          | -2          | 1            | 1            | 1            | 1            | 1            | 1            | 2            |
| Diff. in P(OFDs >= 22)    | 0            | -0.09       | -0.05       | 0.09         | 0.09         | 0.11         | 0.11         | 0.12         | 0.13         | 0.13         |
| Diff. in Mortality        | 0            | 0.066       | 0.035       | -0.043       | -0.047       | -0.051       | -0.055       | -0.058       | -0.061       | -0.064       |
| Pr(Efficacy)              | <b>0.026</b> | 0.000       | 0.000       | <b>0.659</b> | <b>0.752</b> | <b>0.810</b> | <b>0.873</b> | <b>0.911</b> | <b>0.928</b> | <b>0.961</b> |
| Pr(Inferiority)           | 0.011        | 0.406       | 0.108       | 0.000        | 0.000        | 0.000        | 0.000        | 0.000        | 0.000        | 0.000        |
| Pr(Futility)              | 0.293        | 0.561       | 0.684       | 0.012        | 0.002        | 0.002        | 0.002        | 0.002        | 0.000        | 0.001        |
| Pr(Inconclusive)          | 0.670        | 0.033       | 0.208       | 0.329        | 0.246        | 0.188        | 0.125        | 0.087        | 0.072        | 0.038        |
| Average(N)                | 269.1        | 186.9       | 215.9       | 298.8        | 299.8        | 299.8        | 299.8        | 299.8        | 300.0        | 299.9        |
| N for Pr(Efficacy) = 0.85 | -            | -           | -           | 510          | 392          | 346          | -            | -            | -            | -            |

1156

1157 In order to characterize the effect of uncertainty in the distribution of the OFD outcome, these  
 1158 simulations were twice repeated assuming a “mild” and “severe” distribution for the OFD outcome in  
 1159 the placebo group. The frequency distribution, mean, and median of OFDs, for the placebo, mild  
 1160 placebo, and severe placebo groups are displayed in the table below. The mild and severe  
 1161 distributions were selected to examine a wide range in the rate of mortality ( $\pm 5\%$ , nearly double the  
 1162 margin of error of mortality observed in the PassItOn trial).

1163

| <b>OFDs</b>   | <b>Placebo</b> | <b>Mild Placebo</b> | <b>Severe Placebo</b> |
|---------------|----------------|---------------------|-----------------------|
| Mean          | 16.8           | 18.9                | 15.0                  |
| Median        | 22             | 23                  | 20                    |
| P(OFDs >= 23) | 0.45           | 0.55                | 0.38                  |
| Proportion:   |                |                     |                       |
| -1 (death)    | <b>0.176</b>   | <b>0.126</b>        | <b>0.227</b>          |
| 0             | 0.046          | 0.035               | 0.054                 |
| 1             | 0.004          | 0.003               | 0.005                 |
| ---           | ---            | ---                 | ---                   |
| 27            | 0.041          | 0.055               | 0.032                 |
| 28            | 0.084          | 0.119               | 0.063                 |

1164

1165 The results of 1000 simulations in each of the mild placebo and severe placebo scenarios are  
 1166 summarized in the table below. In these simulations, the type-I error probability was slightly anti-  
 1167 conservative at 3.1% and 2.6% (but within simulation margin of error of the 2.5% design  
 1168 specification). The estimated power to detect an odds ratio of 1.55 was greater than 85% in both  
 1169 scenarios.

|            | <b>OFDs / OR</b> | <b>Null</b>  |             | <b>Inferiority</b> |              | <b>Superiority</b> |              |              |              |              |              |
|------------|------------------|--------------|-------------|--------------------|--------------|--------------------|--------------|--------------|--------------|--------------|--------------|
|            |                  | <b>1.00</b>  | <b>0.67</b> | <b>0.80</b>        | <b>1.40</b>  | <b>1.45</b>        | <b>1.50</b>  | <b>1.55</b>  | <b>1.60</b>  | <b>1.65</b>  | <b>1.70</b>  |
| Sever<br>e | Pr(Efficacy)     | <b>0.031</b> | 0.000       | 0.000              | <b>0.650</b> | <b>0.725</b>       | <b>0.824</b> | <b>0.885</b> | <b>0.918</b> | <b>0.931</b> | <b>0.951</b> |
|            | Pr(Inferiority)  | 0.010        | 0.408       | 0.129              | 0.000        | 0.000              | 0.000        | 0.000        | 0.000        | 0.000        | 0.000        |
|            | Pr(Futility)     | 0.306        | 0.554       | 0.663              | 0.010        | 0.005              | 0.002        | 0.001        | 0.000        | 0.000        | 0.001        |

|                  |                  | Null         | Inferiority |       | Superiority  |              |              |              |              |              |              |
|------------------|------------------|--------------|-------------|-------|--------------|--------------|--------------|--------------|--------------|--------------|--------------|
| OFDs / OR        |                  | 1.00         | 0.67        | 0.80  | 1.40         | 1.45         | 1.50         | 1.55         | 1.60         | 1.65         | 1.70         |
| Pr(Inconclusive) |                  | 0.653        | 0.038       | 0.208 | 0.340        | 0.270        | 0.174        | 0.114        | 0.082        | 0.069        | 0.048        |
| Average(N)       |                  | 267.4        | 186.2       | 215.0 | 299.0        | 299.5        | 299.8        | 299.9        | 300.0        | 300.0        | 300.0        |
| Mild<br>Placebo  | Pr(Efficacy)     | <b>0.026</b> | 0.000       | 0.000 | <b>0.648</b> | <b>0.732</b> | <b>0.811</b> | <b>0.852</b> | <b>0.901</b> | <b>0.940</b> | <b>0.956</b> |
|                  | Pr(Inferiority)  | 0.011        | 0.417       | 0.111 | 0.000        | 0.000        | 0.000        | 0.000        | 0.000        | 0.000        | 0.000        |
|                  | Pr(Futility)     | 0.328        | 0.549       | 0.692 | 0.010        | 0.003        | 0.006        | 0.001        | 0.005        | 0.002        | 0.001        |
|                  | Pr(Inconclusive) | 0.635        | 0.034       | 0.197 | 0.342        | 0.265        | 0.183        | 0.147        | 0.094        | 0.058        | 0.043        |
|                  | Average(N)       | 265.1        | 188.1       | 214.5 | 299.0        | 299.7        | 299.4        | 299.9        | 299.5        | 299.8        | 299.9        |

1170

### 1171 **8.7 Analysis of Secondary Outcomes**

1172 The effect of active agent versus placebo on the odds of binary and ordinal secondary outcomes  
 1173 will be quantified using logistic and PO regression methods, respectively, adjusting for patient  
 1174 demographic and clinical factors (see *Primary Analysis*). Time-to-event outcomes will be analyzed  
 1175 using Cox proportional hazards methods. To incorporate death as an appropriately unfavorable  
 1176 possible outcome, deaths will be treated as censored at the end of the evaluation period for the  
 1177 endpoint (e.g., Day 28). Where appropriate, the competing risk of death will be addressed using the  
 1178 cause-specific hazards method. The proportion of participants who died at fixed time points (e.g.,  
 1179 day 28) will be estimated using Kaplan-Meier methods. In order to preserve consistency across the  
 1180 primary and secondary analyses, we will uniformly apply a Bayesian approach using flat priors. For  
 1181 each key secondary outcome, efficacy testing (one-sided) will be assessed using the odds ratio or  
 1182 hazard ratio, by comparing the corresponding posterior probability of efficacy to a threshold. Each  
 1183 threshold will be selected using either a simulation-based method, or an approach similar to most  
 1184 conventional statistical testing procedures, to ensure each test for efficacy has a type-I error  
 1185 probability no more than 2.5%. Odds ratio, hazard ratio, and differences in proportions (e.g., death  
 1186 at 28 days) estimates will be presented with a 95% credible interval.

1187

1188 A gatekeeping/fixed-sequence testing approach will be used to preserve the type-I error rate across  
 1189 tests of the primary and secondary outcomes. Specifically, a conclusion of efficacy regarding the  
 1190 primary outcome will be required prior to testing the key secondary outcomes. The fixed-sequence  
 1191 method will be used to test the following key secondary outcomes in the order given: alive and  
 1192 respiratory failure-free at day 28, the WHO 8-point ordinal scale at day 28, and mortality at day 28.  
 1193 A one-sided type-I error rate of 2.5% will be used for each test. This approach preserves the  
 1194 familywise type-I error rate for the family of primary and key secondary outcomes. Heterogeneity of  
 1195 treatment effect may be examined for secondary and safety outcomes, as a function of pre-existing  
 1196 patient characteristics and baseline variables.

### 1197 **8.8 Analysis of Safety Outcomes**

1198 Monitoring and reporting of safety events will be conducted continuously as described in the Data  
 1199 and Safety Monitoring Plan. This section describes the assessment of safety endpoints at the  
 1200 interim and final analyses. Agent-specific safety and toxicity endpoints (if any) are detailed in that  
 1201 therapy's appendix. The frequencies of adverse events, mortality, and other safety endpoints, and  
 1202 the treatment effect on the odds of these events (i.e., the odds ratio) will be reported with 95%  
 1203 credible intervals, using Bayesian ordinal and binary logistic regression methods in a manner  
 1204 similar to that described for the analysis of secondary outcomes.

**1205 8.9 Adherence and Retention Analyses**

1206 Receipt of planned therapy will be recorded on case report forms and monitored continuously.  
1207 Should minimum adherence not be achieved routinely, the arm may require modification.  
1208 Adherence, retention, and accrual will be reported to the DSMB and may be considered as reasons  
1209 for premature termination or suspension of arms, or the entire platform.

**1210 8.10 Baseline Descriptive Statistics**

1211 All variables will be summarized using median and other quantiles, mean, and Gini's mean  
1212 difference (a robust measure of variability defined as the mean absolute difference between any two  
1213 patients' values). Variable summaries will be presented by treatment group. Because treatments are  
1214 randomized, differences in baseline characteristics will not be formally tested with respect to  
1215 treatment groups. Emphasis is placed on describing the patient sample. In the case that inclusion  
1216 criteria differ across the various treatment arms, treatment specific summaries will be made by  
1217 combining patients enrolled in each specific treatment arm and its matching placebo group.

**1218 8.11 Exploratory Analyses**

1219 Exploratory analyses may proceed as specified within arm-specific SAPs. Exploratory analyses that  
1220 are not specified prior to data collection, such as exploration of the association between novel  
1221 biomarkers and treatment response, are acceptable. In general, the SAP for such exploratory  
1222 analyses should be specified prior to executing the exploratory analysis.

1223

**1224 9 Measures to Minimize Bias****1225 9.1 Enrollment/Randomization/Blinding**

1226 All participants meeting eligibility for inclusion will be screened for exclusion criteria. Reasons for  
1227 exclusion will be documented. Monitoring for systematic exclusions will be continuous and failure to  
1228 screen and enroll without bias may result in termination of a site from the trial.

1229 To prevent bias in allocation of participants to individual sub studies or to arms within sub studies,  
1230 participant eligibility should be confirmed prior to releasing the randomization allocation.  
1231 Randomization will occur at baseline and will generally be equal across all arms for which a patient  
1232 is eligible unless specified in an arm-specific appendix. Randomization will be stratified by study  
1233 site.

1234 Blinding of patients, providers, and study team members to study arm allocation will be employed to  
1235 reduce bias in conducting study activities and evaluations. Special precautions may be needed to  
1236 blind outcomes assessors if patients or investigators are unblinded to treatment assignment.

**1237 10 Source Documents and Access to Source Data/Documents**

1238 Source documents are original documents, data, or records that are created during a clinical study,  
1239 relating to the medical treatment and the history of the participant, and from which study data are  
1240 obtained. The purpose of source documents is to document the existence of study participants and  
1241 substantiate the integrity of the study data collected. Any document in which information, an  
1242 observation, or data generated relevant to a study is recorded for the first time is a source document.

1243 Each study participant will sign a consent form, which includes language on who may access their  
1244 source data and documents used for the study. Locations where study data are generated must  
1245 allow access to source documents as part of clinical study monitoring and oversight.

**1246 11 Quality Assurance and Quality Control**

1247 Quality assurance (QA) is implemented by the study team through a system of best-practice  
1248 standards, reviews, and corrective actions ensuring products and services are of the highest  
1249 achievable quality. The study team and staff members participate in a number of quality activities,  
1250 ensuring the sponsor, OHRP, and FDA research standards are met. QA also encompasses  
1251 independent QA oversight processes verifying the quality of the work through independent reviews,  
1252 qualifications, inspections, and audits, assuring research staff members, contractors, and service  
1253 providers are following the best research and professional practices.

1254 Quality control (QC) activities include data entry checks in the electronic data capture (EDC)  
1255 system, centralized monitoring, in-person or remote site monitoring, and other activities. To monitor  
1256 studies, clinical monitoring staff review research records and regulatory documents. Reports  
1257 generated from the EDC system may also guide discussions with site research staff.

**1258 12 Ethics/Protection of Human Subjects****1259 12.1 Ethical Standard**

1260 All studies conducted under this Master Protocol will adhere to the highest ethical standards. The  
1261 trial will be carried out in compliance with the protocol, the ethical principles laid down in the  
1262 Declaration of Helsinki, in accordance with the ICH Harmonized Guideline for Good Clinical  
1263 Practice (GCP), the EU directive 2001/20/EC/EU regulation 536/2014 and other relevant  
1264 regulations. Further, studies will be conducted in full conformity with Regulations for the Protection  
1265 of Human Subjects of Research codified in 45 CFR Part 46, 21 CFR Part 50, 21 CFR Part 56,  
1266 and/or the ICH E6.

**1267 12.2 IRB/Ethics Committee/Competent Authority**

1268 This trial will be initiated only after all required legal documentation has been reviewed and  
1269 approved by the Vanderbilt University Medical Center's IRB (serving as the single IRB [sIRB])/  
1270 Independent Ethics Committee (IEC) and competent authority (CA) according to national and  
1271 international regulations. The same applies for the implementation of changes introduced by  
1272 amendments to both the protocol and informed consent form. A determination will be made  
1273 regarding whether previously consented participants need to be re-consented.

**1274 12.3 Posting of Clinical Trial Consent Form**

1275 The informed consent form approved by the sIRB for US sites will be posted on the clinical  
1276 trials.gov website after the clinical trial protocol is finalized and the first patient is enrolled.

**1277 12.4 Participant and Data Confidentiality**

1278 Participant confidentiality and privacy is strictly held in trust by the participating investigators, their  
1279 staff, and the sponsor(s). This confidentiality is extended to cover testing of biological samples and  
1280 genetic tests in addition to the clinical information relating to participants.

1281 The study monitor, other authorized representatives of the sponsor, representatives of the sIRB, and  
1282 regulatory agencies may inspect all documents and records required to be maintained by the  
1283 investigator, including but not limited to, medical records (office, clinic, or hospital) and pharmacy  
1284 records for the participants in this study. The clinical study site will permit access to such records. In  
1285 the case a pharmaceutical company holds an IND for an agent contributing to this study and on which  
1286 this study relies, the pharmaceutical company supplying study product may also inspect study records.

ACTIV-4 Host Tissue  
Protocol Version: 1.8 dated 2021.12.17.

1287 The study participant's research information will be securely stored at each clinical site and  
1288 transmitted to and securely stored at the Data Coordinating Center. The study data entry and study  
1289 management systems used by clinical sites and by the Data Coordinating Center research staff will  
1290 be secure and password protected. Wherever feasible, data will be identified by a Participant ID  
1291 number, and not by any direct identifiers. At the end of the study, all records at a clinical site will  
1292 continue to be kept in a secure location for as long a period as dictated by the reviewing sIRB,  
1293 Institutional policies, or sponsor requirements. On completion of the study, de-identified data may  
1294 be made available to others outside the study team.

### 1295 **12.5 Certificate of Confidentiality**

1296 To further protect the privacy of study participants, a Certificate of Confidentiality will be issued by  
1297 the NIH. This certificate protects identifiable research information from forced disclosure. It allows  
1298 the investigator and others who have access to research records to refuse to disclose identifying  
1299 information on research participation in any civil, criminal, administrative, legislative, or other  
1300 proceeding, whether at the federal, state, or local level. By protecting researchers and institutions  
1301 from being compelled to disclose information that would identify research participants, Certificates  
1302 of Confidentiality help achieve the research objectives and promote participation in studies by  
1303 helping assure confidentiality and privacy to participants.

### 1304 **13 Adverse events**

1305 Assuring patient safety is an essential component of this protocol. Use of these agents for COVID-  
1306 19 raises unique safety considerations. This protocol addresses these considerations through:

- 1307 1. Exclusion criteria designed to prevent enrollment of patients likely to experience adverse  
1308 events with receipt of these agents
- 1309 2. Proactive education of treating clinicians regarding medication interactions relevant to use of  
1310 these agents in the inpatient setting
- 1311 3. On-study monitoring of co-interventions and patient characteristics to intervene before  
1312 adverse events occur
- 1313 4. Systematic collection of outcomes relevant to the safety of these agents in this setting
- 1314 5. Structured reporting of adverse events  
1315

1316 The safety and monitoring approach in this platform is aligned with the expected impact of the  
1317 investigational agents in the hospitalized COVID-19 population. All of the investigational agents  
1318 have short half-lives, and it is expected their biologic effect would be seen during or shortly after  
1319 treatment. Thus, the focus of safety monitoring through day 60 will be broad safety monitoring and  
1320 reporting of serious adverse events felt to be at least possibly related to the investigational agent.  
1321 Importantly, patients with COVID-19 often experience multisystem illness, including ARDS, cardiac  
1322 and renal injury. As a result, many anticipated serious adverse events will be collected as study  
1323 outcomes (protocol-specified exempt serious events (PSESEs) as listed in **section 13.2**) and will  
1324 be monitored by the DSMB rather than be subject to strict reporting criteria associated with adverse  
1325 events. Adverse events and PSESEs will be monitored to ensure real-time participant protection.  
1326 The safety evaluation of the study intervention includes several components to be reviewed  
1327 regularly by the NHLBI-appointed independent DSMB.

1328 All other AEs are collected for the study intervention (either the blinded investigational agent or placebo).

1329 Events will be reported to regulators and IRBs/ethics committees as appropriate/required.

1330 Adverse events and unanticipated problems will be regularly reviewed by the DSMB.

ACTIV-4 Host Tissue

Protocol Version: 1.8 dated 2021.12.17.

1331 The following information will be collected on electronic case report forms, and will be regularly  
1332 reviewed by the DSMB, to evaluate and help ensure safety:

- 1333 • Deaths through Day 90
- 1334 • Hospital readmissions through Day 60
- 1335 • Protocol-specified exempt serious events (PSESEs) (see section 13.2) through Day 60
- 1336 • Adverse Events that are Serious OR are Definitely or Possibly Related (or of Uncertain  
1337 Relationship) OR are a Grade 3 or 4 Clinical AE (isolated laboratory abnormalities that  
1338 are not associated with signs or symptoms are not collected)

1339 We outline the safety data collected in Table 2.  
1340

|                                                                            | Day 0–5 | Day 14         | Day 28         | Day 60         | Day 90 |
|----------------------------------------------------------------------------|---------|----------------|----------------|----------------|--------|
| All grade 3 and 4 clinical AEs (new or increased in severity to Grade 3/4) | X       | X <sup>a</sup> | X <sup>a</sup> | X <sup>a</sup> |        |
| Protocol-specified exempt serious events (PSESEs) <sup>b</sup>             | X       | X              | X              | X              |        |
| Recordable AEs that are not PSESEs                                         | X       | X              | X              | X              |        |
| Unanticipated Problems                                                     | X       | X              | X              | X              |        |
| Mortality                                                                  | X       | X              | X              | X              | X      |

<sup>a</sup>Participants will be asked about all new relevant adverse events which have occurred since the last data collection, up to that time point. On these visits, qualifying AEs will be collected.  
<sup>b</sup>These are explained and defined in section 13.2.

1341 **13.1 Defining adverse events**  
1342

1343 **Adverse Events** will be defined as any untoward medical occurrence associated with use of the  
1344 study drug or study procedures, whether or not the event is related to the study drug or study  
1345 procedures. If a diagnosis is clinically evident (or subsequently determined), the diagnosis, rather  
1346 than the individual signs and symptoms or lab abnormalities, will be recorded as the AE.  
1347

1348 **a. Seriousness:**  
1349

1350 **Serious Adverse Event** will be defined as an adverse event that, in the view of the investigator,  
1351 resulted in any of the following outcomes:

- 1352 1. **Death**
  - 1353 2. **A life-threatening event that places the patient at immediate risk of death**
    - 1354 ○ *Does not include events that, had they been more severe, might have caused death*
  - 1355 3. **Inpatient hospitalization or prolongation of existing hospitalization**
    - 1356 ○ As per <http://www.fda.gov/Safety/MedWatch/HowToReport/ucm053087.htm>)
  - 1357 4. **Persistent or significant incapacity or substantial disruption of the ability to conduct  
1358 normal life functions, or a congenital anomaly/birth defect**
    - 1359 ○ As per <http://www.fda.gov/Safety/MedWatch/HowToReport/ucm053087.htm>)
- 1360



ACTIV-4 Host Tissue

Protocol Version: 1.8 dated 2021.12.17.

1361 Important medical events that may not result in death, be life-threatening, or require hospitalization may  
1362 be considered serious when, based on appropriate medical judgment, they jeopardize patient safety or  
1363 require medical or surgical intervention to prevent one of the outcomes listed in this definition.

1364 **b. Causality:**

1365 A **Related or Possibly Related Adverse Event** will be defined as any adverse event for which  
1366 there is a "reasonable possibility" of a causal relationship between the study drug or study  
1367 procedure and the adverse event. For each recorded adverse event, investigators will grade the  
1368 strength of the relationship of study drug or study procedure to the adverse event, as follows:

- 1369 ○ **Definitely Related:** The adverse event meets all three of the following criteria: (a) a temporal  
1370 sequence from receipt of study drug or study procedure to the adverse event suggests  
1371 relatedness, (b) the event cannot be explained by the known characteristics of the patient's  
1372 clinical state or other therapies, and (c) evaluation of the patient's clinical state indicates to  
1373 the investigator the experience is definitely related to study drug or study procedures.
- 1374 ○ **Possibly Related:** In the investigator's opinion, the adverse event is possibly related to study  
1375 procedures but one or more of the above criteria for "Definitely Related" are not met.
- 1376 ○ **Probably Not Related:** The adverse event occurred while the patient was on the study but, in  
1377 the opinion of the investigator, can reasonably be explained by the known characteristics of  
1378 the patient's clinical state or other therapies.
- 1379 ○ **Definitely Not Related:** The adverse event was definitely produced by the patient's clinical  
1380 state or by other therapies and not by the study drug or study procedures.
- 1381 ○ **Uncertain Relationship:** The adverse event does not meet any of the criteria previously  
1382 outlined.

1383

1384 **c. Expectedness:**

1385 An **Unexpected Adverse Event** is defined as an adverse event that is not listed in the investigator  
1386 brochure or study protocol or is not listed at the specificity or severity that has been observed.

1387

1388 **d. Severity:**

1389 The investigator will evaluate all AEs with respect to both seriousness (defined in 13.1.a. above)  
1390 and **severity** (intensity or grade). AEs will be graded for severity according to the *DAIDS Table for*  
1391 *Grading the Severity of Adult and Pediatric Adverse Events* (also known as the DAIDS AE Grading  
1392 Table). For specific events that are not included in the DAIDS AE Grading Table, the generic scale  
1393 listed below is to be used:

1394

1395

1396

1397

1398

1399

1400

1401

1402

1403

1404

1405

1406

1407

**Generic AE Grading Scale**

|         |                                                                                                                                                                                   |
|---------|-----------------------------------------------------------------------------------------------------------------------------------------------------------------------------------|
| Grade 1 | Events causing no or minimal interference with usual social and functional activities, and NOT raising a concern, and NOT requiring a medical intervention/ therapy.              |
| Grade 2 | Events causing greater than minimal interference with usual social and functional activities; some assistance may be needed; no or minimal medical intervention/therapy required. |
| Grade 3 | Events causing inability to perform usual social and functional activities; some assistance usually required; medical intervention/therapy required.                              |
| Grade 4 | Events causing inability to perform basic self-care functions; medical or operative intervention indicated to prevent permanent impairment, persistent disability, or death.      |
| Grade 5 | Events resulting in death.                                                                                                                                                        |

1408

1409 **13.2 Protocol-specified exempt serious events (PSESEs)**

1410 Outcomes of acute respiratory infection, COVID-19, and critical illness will be systematically  
1411 collected as Protocol-specified exempt serious events (PSESEs) for all patients.

1412

1413 **PSESEs are exempt from adverse event reporting unless:**

- 1414 1. the event is determined to be Serious and Definitely or Possibly Related to the study drug or  
1415 study procedures;  
1416 2. the event is determined to be Unexpected and Definitely or Possibly Related to the study  
1417 drug or study procedures; or

1418

1419 This approach is taken to avoid creating an overly cumbersome safety oversight environment by  
1420 identifying expected clinical outcomes as safety events and obscuring real safety signals. Even as  
1421 they are exempted from expedited reporting requirements, PSESEs will be reviewed regularly  
1422 (unblinded, by treatment arm) by the DSMB to maintain the integrity of safety monitoring for the  
1423 trial. PSESEs that meet none of the criteria above will not be recorded or reported as AEs.  
1424 PSESEs may occur during the initial hospitalization, lead to a re-admission, or occur in a later  
1425 hospitalization during follow-up. The following are study-specific exempt serious events:

1426

- 1427 • Death (not Definitely or Possibly Related to the study drug or study procedures)
- 1428 • Neurological Events:
  - 1429 ○ Seizure
  - 1430 ○ Stroke
- 1431 • Cardiovascular Events:
  - 1432 ○ Hypotension as defined by low arterial blood pressure leading to either [1] initiation
  - 1433 or increase in vasopressor therapy, [2] administration of a fluid bolus of 500 ml or
  - 1434 more, or [3] modification of the dose or discontinuation of the study drug.
  - 1435 ○ Atrial or ventricular arrhythmia
  - 1436 ○ Cardiomyopathy
  - 1437 ○ Cardiac arrest
  - 1438 ○ Myocardial injury
  - 1439 ○ Acute coronary syndrome

## ACTIV-4 Host Tissue

Protocol Version: 1.8 dated 2021.12.17.

- 1440                   ○ Hypertension as defined by elevated arterial blood pressure leading to either [1]  
1441                   initiation or increase in antihypertensive medications or [2] discontinuation of the  
1442                   study drug  
1443
- 1444                   • Respiratory events:
    - 1445                   ○ Hypoxemia requiring supplemental oxygen
    - 1446                   ○ Acute respiratory distress syndrome
    - 1447                   ○ Receipt of non-invasive or invasive mechanical ventilation
    - 1448                   ○ Receipt of extra-corporeal membrane oxygenation
  - 1449                   • Gastrointestinal events:
    - 1450                   ○ Elevation in aspartate aminotransferase or alanine aminotransferase
    - 1451                   ○ Acute pancreatitis
  - 1452                   • Renal events:
    - 1453                   ○ Acute kidney injury
    - 1454                   ○ Receipt of new renal replacement therapy
  - 1455                   • Endocrine events:
    - 1456                   ○ Symptomatic hypoglycemia
  - 1457                   • Hematologic or coagulation events:
    - 1458                   ○ Neutropenia, lymphopenia, anemia, or thrombocytopenia
    - 1459                   ○ Venous thromboembolism
  - 1460                   • Dermatologic events:
    - 1461                   ○ Severe dermatologic reaction (e.g., Steven's Johnson Syndrome)

1462

1463 A PSESE for “initiation of vasopressor therapy” should be recorded for patients who newly receive  
1464 any vasopressor at a dose of at least 0.1 mcg/kg/min norepinephrine equivalents (see table). A  
1465 PSESE for an “increase in vasopressor therapy” should be recorded for patients receiving a  
1466 vasopressor at a dose of at least 0.1 mcg/kg/min norepinephrine equivalents who experience a  
1467 doubling of vasopressor dose compared to either the dose at the time of randomization or the  
1468 lowest dose in the prior 24 hours.  
1469

| Drug                        | Dose          | Norepinephrine equivalent |
|-----------------------------|---------------|---------------------------|
| Epinephrine <sup>a</sup>    | 0.1 µg/kg/min | 0.1 µg/kg/min             |
| Norepinephrine <sup>a</sup> | 0.1 µg/kg/min | 0.1 µg/kg/min             |
| Dopamine <sup>a</sup>       | 15 µg/kg/min  | 0.1 µg/kg/min             |
| Phenylephrine <sup>b</sup>  | 1.0 µg/kg/min | 0.1 µg/kg/min             |
| Vasopressin                 | 0.04 U/min    | 0.1 µg/kg/min             |

1470

1471

1472 Note: Consistent with this approach, sites will evaluate a potential adverse event to determine  
1473 whether it is a PSESE. If it is not a PSESE, it will be recorded and reported as an adverse event as

1474 outlined below. If the event is a PSESE, it will be evaluated for relatedness and expectedness. If the  
1475 event is Serious and Definitely or Possibly Related, Unexpected and Definitely or Possibly Related  
1476 it will be recorded as both a PSESE and an Adverse Event. If the PSESE does not meet either of  
1477 these three criteria, then the event will be recorded as a PSESE in the PSESE eCRF as a study  
1478 outcome. A study-specific clinical outcome may also qualify as a reportable adverse event. For  
1479 example, a ventricular arrhythmia the investigator considers Serious and Definitely or Possibly  
1480 Related to the study drug would be both recorded as a study-specific clinical outcome and reported  
1481 as a Serious and Definitely or Possibly Related Adverse Event.

### 1482 **13.3 Monitoring and recording adverse events**

1483 The principal investigator at each study site has the responsibility for the safety of the individual  
1484 participants under his or her care. For inpatients through day 28, on a daily basis the investigator or  
1485 designee will determine if any adverse event has occurred. For each adverse event, the  
1486 investigator will determine whether the adverse event was serious, whether it was definitely or  
1487 possibly related to study drug or study procedures, whether it was unexpected, and of what severity  
1488 it was.

1489 The following categories of adverse events will be recorded as AEs in the Adverse Event case  
1490 report form:

- 1491 ○ Adverse Events that Qualify for Expedited Reporting:
  - 1492 ○ Serious Unexpected, and Definitely or Possibly Related Adverse Events [also known
  - 1493 as “Suspected Unexpected Serious Adverse Reactions” (SUSARs)]- adverse events
  - 1494 that are considered by the investigator to be serious, unexpected, and definitely or
  - 1495 possibly related to the study drug or study procedures
- 1496 ○ Adverse Events that Qualify for Recording and Routine Reporting thru Day 60
  - 1497 ○ Non-SUSAR adverse events that are ‘Serious and Definitely or Possibly Related or
  - 1498 of Uncertain Relationship’ OR that are “Unexpected and Definitely or Possible
  - 1499 Related or of Uncertain Relationship”, regardless of whether they are PSESEs
  - 1500 ○ Non-SUSAR adverse events that are Serious and are not PSESEs
  - 1501 ○ Non-SUSAR adverse events that are Definitely Related, Possibly Related, or of
  - 1502 Uncertain Relationship and are not PSESEs
  - 1503 ○ Non-SUSAR adverse events that are Grade 3 or 4 Clinical AEs and are not PSESEs

### 1504 **13.4 Reporting adverse events**

1505 This section describes the schedule for recording and reporting different types of safety events on  
1506 eCRFs. In the care of study participants more information may be collected and recorded in the  
1507 participant’s medical record. The information collected in the medical record serves as source  
1508 documentation of events (e.g., signs, symptoms, diagnoses) considered for reporting on eCRFs as  
1509 part of protocol data collection.

1510

#### 1511 **13.4.1 Adverse Events that Qualify for Expedited Reporting**

1512 Adverse Events that qualify for Expedited Reporting include events that: are Serious, Unexpected  
1513 and Definitely or Possibly Related (also known as Suspected Unexpected Serious Adverse  
1514 Reactions, SUSARs. Adverse Events that qualify for Expedited Reporting (SUSARs) must be  
1515 reported to the coordinating center by site investigators within 24 hours of site investigators  
1516 becoming aware of the adverse event. The investigator at the study site or designee should inform  
1517 the clinical coordinating center both by telephone and by official notification via completion of the  
1518 Adverse Event case report form (Figure 2). The Medical Monitor may discuss with the site PI to

ACTIV-4 Host Tissue

Protocol Version: 1.8 dated 2021.12.17.

1519 determine if this event meets criteria for requiring Expedited Reporting (SUSAR). Events requiring  
1520 Expedited Reporting (SUSARs) will be reported by the clinical coordinating center to the DSMB,  
1521 sIRB, FDA and NHLBI within 7 calendar days of receipt of the report from the study site. A copy of  
1522 the Adverse Event case report form will be sent to the FDA, DSMB, sIRB, and NHLBI within 14  
1523 calendar days of receipt of the report from the study site. Adverse Events requiring Expedited  
1524 Reporting (SUSARs) are followed until the outcome of the Adverse Event is known. If the outcome  
1525 of an Adverse Events is still unknown at the time of the final follow-up visit, the outcome will be  
1526 entered in the database as “unknown.”

1527  
1528 Adverse Events, that qualify for recording, but do not qualify for Expedited Reporting (i.e., adverse  
1529 events that are not SUSARs), will be recorded on the Adverse Event eCRF through day 60. The  
1530 DSMB will review all recorded adverse events during the scheduled meetings. The clinical  
1531 coordinating center will distribute the written summary of the DSMB’s review including the review of  
1532 adverse events to the sIRB. If the DSMB determines the overall rate of adverse events is higher in  
1533 the intervention group than the control group, the coordinating center will notify the sIRB and the  
1534 Food and Drug Administration within 14 calendar days of this determination.

1535 All deaths are reported on the eCRF for deaths. Deaths considered **definitely or possibly related**  
1536 **to the study intervention** (blinded investigational agent/placebo) must **also** be reported as an AE  
1537 and may qualify for Expedited Reporting

1538  
1539 Unanticipated problems are findings discovered during the conduct of the trial that suggest  
1540 participation in the trial may have more risk than was anticipated prior to the initiation of the trial.  
1541 Unanticipated problems will also be reported within 14 days of the coordinating center learning  
1542 about them to the DSMB and NHLBI.

1543

#### 1544 **13.4.2 Grade 3 and 4 Clinical Adverse Events**

1545 From Day 0 through Day 60, Clinical Adverse Events that are not PSESEs reaching Grade 3 or 4  
1546 severity level will be recorded on an eCRF. For a Clinical Adverse Event that was present at  
1547 baseline, only those newly reaching Grade 3 or 4 will be recorded.

1548  
1549 Clinical Adverse Events that are not PSESEs reaching Grade 3 or 4 severity level that occur between  
1550 days 0 through 60 will be recorded on an eCRF at the time of phone follow-up. The date the event  
1551 reaches the indicated grade will be collected to permit time-to-event analyses. These Clinical Adverse  
1552 Events should be assessed for seriousness, relatedness, expectedness, severity (Section 13.3) and  
1553 unanticipated problems. These events should be reported on the Adverse Event eCRF.

#### 1554 **13.4.3 Pregnancy**

1555 The investigator or designee will collect pregnancy information on any female participants who  
1556 become pregnant up to 24 hours after receiving study drug unless indicated differently in the drug-  
1557 specific appendix. The participant will be followed to determine the outcome of the pregnancy.

1558

1559

1560

1561

1562

1563

1564

1565  
 1566

**Figure 2. Adverse Event and Clinical Outcome Assessment, Recording, and Reporting**

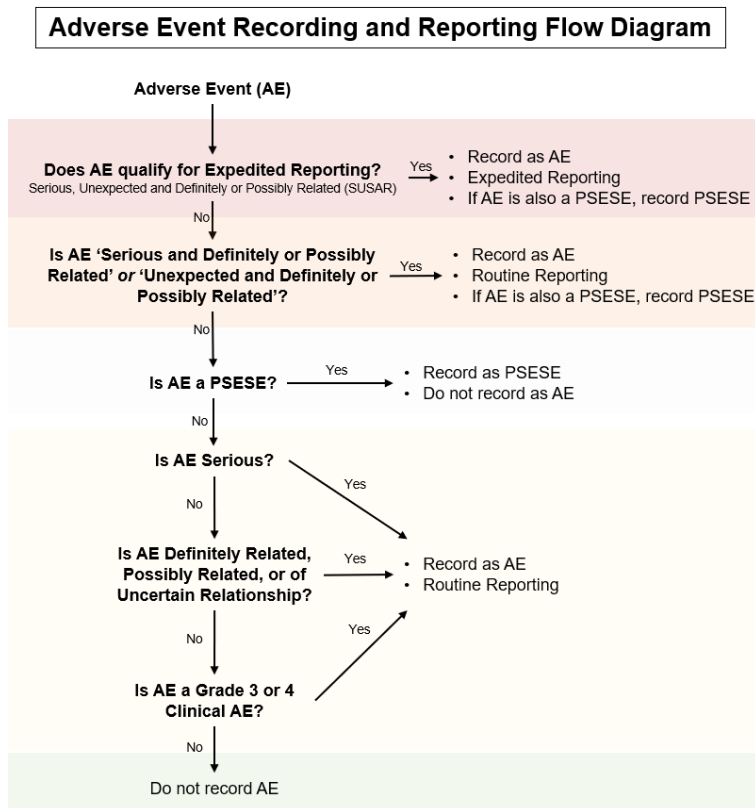

**Recording of AEs** – AEs that meet trial criteria for being recorded will be entered by site personnel into the AE eCRF in REDCap. Information will be provided on the attributes of each AE, including its seriousness, relatedness, expectedness, and severity.

**Reporting of AEs** – AEs that qualify for **Expedited Reporting** will be submitted to the Coordinating Center for review by the Medical Monitor and reporting to the DSMB, IRB, NHLBI, and FDA as outlined in the MOP. AEs that qualify for **Routine Reporting** will be reported using information in the eCRF to the DSMB at scheduled meetings, to the IRB at annual IRB review, and to the FDA as required.

1567  
 1568

**1569 13.5 Medical Monitor**

1570 An experienced medical monitor is assigned to the trial. The medical monitor will work with the site  
 1571 PI and study team to review Adverse Events that potentially require Expedited reporting and make  
 1572 an independent assessment of seriousness, relatedness, expectedness, and severity. The medical  
 1573 monitor will work with the Coordinating Center to prepare sponsor safety report and communicate  
 1574 as needed with the DSMB and the Investigational New Drug (IND) holder through the study safety  
 1575 office or other mechanism mutually agreed to and documented. An Urgent Safety Measure (USM)  
 1576 is a procedure which is not defined by the protocol that can be put in place to protect clinical trial  
 1577 participants from any immediate hazard to their health and safety. It is the responsibility of the  
 1578 investigator to apply the appropriate level of USM for the safety and protection of each participant  
 1579 in this study in order to prevent harm. USMs may be applied immediately without prior approval  
 1580 from the sponsor, competent authority (CA) or IRB/IEC. However, they must be reported to the  
 1581 sponsor and to the PI immediately (within 24 hours) who will then inform the CA and IRB/IEC  
 1582 according to local regulation.

1583  
 1584 The medical monitor will remain blinded in all discussions with the study team regarding expedited

1585 reporting and recording to perform an unbiased assessment of seriousness, relatedness,  
1586 expectedness, and severity. In the event the monitor and clinical team feel that unblinding is  
1587 needed for safety purposes the monitor will communicate this with the Coordinating Center for  
1588 documentation purposes who will confer treating assignment to the medical monitor. When this  
1589 occurs, an alternate medical monitor will be utilized to review the AE with the study team to  
1590 determine seriousness, severity, and relatedness.

1591  
1592 The medical monitor or the DSMB may request enrollment be halted for safety reasons (e.g.,  
1593 unacceptably high rate of Serious Adverse Events). If the treatment arm is temporarily halted or  
1594 stopped for safety reasons, IRBs/ethics committees will be informed. The IND holder(s) and  
1595 sponsor(s), in collaboration with the protocol chair and the DSMB, will determine if it is safe to  
1596 resume the study. The sponsor will notify the Site Investigators of this decision. The conditions for  
1597 resumption of the study will be defined in this notification. The Site Investigators will notify their  
1598 local IRBs/ethics committees of the decision to resume the study.

## 1599 **14 Risk Assessment**

### 1600 **14.1 Potential risks of other study procedures**

1601 See agent-specific appendices for agent-specific safety risks.

### 1602 **14.2 Minimization of risk**

1603 Federal regulations at 45 CFR 46.111(a)(1) require that risks to participants are minimized by using  
1604 procedures which are consistent with sound research design. This trial protocol incorporates  
1605 numerous design elements to minimize risk to patients that meet this human subject protection  
1606 requirement.

### 1607 **14.3 Potential benefit**

1608 Study participants may or may not receive any direct benefits from their participation in this study.  
1609 Administration of these agents may improve clinical outcomes among adults hospitalized for  
1610 COVID-19 infection.

### 1611 **14.4 Risk in relation to anticipated benefit**

1612 Federal regulations at 45 CFR 46.111 (a)(2) require “the risks to subjects are reasonable in relation  
1613 to anticipated benefits, if any, to subjects, and the importance of the knowledge that may  
1614 reasonably be expected to result.” Based on the preceding assessment of risks and potential  
1615 benefits, the risks to subjects are reasonable in relation to anticipated benefits All agents have an  
1616 acceptable safety profile and have been or are currently being studied in Phase 2 trials of patients  
1617 with COVID-19. As new agents are added, any change in risks in relation to anticipated benefit will  
1618 be described in the agent specific appendix.

## 1619 **15 Data and Safety Monitoring Board (DSMB)**

1620 The role of the DSMB is to monitor patient safety and integrity of the trial. The full details of the  
1621 DSMB will be provided separately by NHLBI in the DSMB charter. We outline the role of the DSMB  
1622 here. The independent DSMB will be comprised of individuals with appropriate expertise such as  
1623 clinician scientists in critical care, emergency medicine, pulmonology, nephrology, cardiology, trial  
1624 design, biostatistics, and ethics. The DSMB will review reports. Any post-randomization or  
1625 outcomes data presented by treatment group in reports will be prepared by unmasked statisticians  
1626 not otherwise involved with trial conduct or design decisions, who will conceal such information from  
1627 the investigator team. These unmasked statisticians will compute the efficacy and futility criteria at

ACTIV-4 Host Tissue  
Protocol Version: 1.8 dated 2021.12.17.

1628 regular intervals as described previously. The DSMB chairperson will be alerted to any decision  
1629 threshold for stopping being met. Beyond assessing fidelity to prespecified adaptations, the  
1630 principal role of the DSMB is to assure the safety of participants in this trial. They will regularly  
1631 monitor data from this trial, review and assess the performance of its operations, and make  
1632 recommendations with respect to aspects of trial conduct such as:

- 1633 • Adverse events
- 1634 • Evidence of efficacy or adverse events
- 1635 • New external information, early attainment of study objectives, safety concerns
- 1636 • Possible modifications in the clinical trial protocol
- 1637 • Inadequate performance of the trial overall

1638

## 1639 **16 Data Handling and Record Keeping**

### 1640 **16.1 Data Collection and Management Responsibilities**

1641 Data collection is the responsibility of the delegated clinical trial staff at the site under the  
1642 supervision of the site investigator. The investigator is responsible for ensuring the accuracy,  
1643 completeness, legibility, and timeliness of the data reported.

1644 All source documents should be completed in a neat, legible manner to ensure accurate  
1645 interpretation of data.

1646 Source document worksheets for recording data for each participant enrolled in the study will be  
1647 provided as needed. Data recorded in the eCRF derived from source documents should be  
1648 consistent with the data recorded on the source documents.

1649 Clinical data (including AEs, concomitant medications, and expected adverse reactions data) and  
1650 clinical laboratory data will be entered into secure, compliant data capture systems provided by the  
1651 Data Coordinating Center. The data system includes password protection and internal quality  
1652 checks, such as automatic range checks, to identify data that appear inconsistent, incomplete, or  
1653 inaccurate.

### 1654 **16.2 Study Records Retention**

1655 Per FDA regulation 312.62 ©, study documents should be retained for a minimum of 2 years after  
1656 the last approval of a marketing application in an International Conference on Harmonization (ICH)  
1657 region and until there are no pending or contemplated marketing applications in an ICH region or  
1658 until at least 2 years have elapsed since the formal discontinuation of clinical development of the  
1659 study intervention. Study documents may be retained for a longer period, however, if required by  
1660 local regulations. No records will be destroyed without the written consent of the sponsor, if  
1661 applicable. It is the responsibility of the sponsor to inform the investigator when these documents no  
1662 longer need to be retained.

### 1663 **16.3 Protocol Deviations**

1664 A protocol deviation is any noncompliance with the clinical trial protocol and, GCP requirements.  
1665 The noncompliance may be either on the part of the participant, the investigator, or the study site  
1666 staff. As a result of deviations, corrective actions are to be developed by the site and implemented  
1667 promptly.

1668 It is the responsibility of the site PI/study staff to use continuous vigilance to identify and report  
1669 deviations.



1670 Protocol deviations must be reported to the sIRB per their guidelines. The site PI/study staff is  
1671 responsible for knowing and adhering to requirements for reporting protocol deviations to the study  
1672 coordinating center and sIRB, and these details will be included in the platform MOP.

## 1673 **16.4 21 CFR Part 11 Compliance**

### 1674 1675 **16.4.1 Record locking**

1676 This trial will utilize the REDCap record-locking feature, that will allow the users to lock a participant  
1677 record. A complete audit trail of the locked records will be kept in the data instrument's history log.  
1678 Users will receive a prompt when locking an entire record. They will be asked to review a PDF copy  
1679 of the entire record to confirm it is the correct record and/or file. Once the PDF has been reviewed  
1680 and confirmed, the record will be locked. All records that are locked using record-level locking will  
1681 have a duplicate copy of the Portable Document Format (PDF) file automatically stored on a secure  
1682 file server outside of REDCap. The record-locking feature complies with all the requirements  
1683 described in 21 CFR Part 11 for FDA trials and has been validated at VUMC.

### 1684 **16.4.2 eConsent**

1685 One option in this trial is to utilize the REDCap eConsent feature. VUMC has developed an  
1686 electronic consent (eConsent) framework within the REDCap platform allowing research  
1687 participants to rapidly review and sign consent documentation for delivery via web, tablet, or  
1688 smartphone. Electronic consent forms can leverage standard REDCap survey features including  
1689 multi-lingual language capacity for information rendering and capture. Upon completion, the system  
1690 documents the 'consent transaction' and stores final, "frozen" consent PDFs in REDCap, allowing  
1691 researchers to retrieve information on the consent type, status, and version at any time. Consents  
1692 are also stored in a separate secure document system for redundancy and permanent archival. The  
1693 REDCap eConsent framework has been 21 CFR Part 11 validated at VUMC.

1694

## 1695 **17 Study Finances**

### 1696 **17.1 Funding Source**

1697 Support for studies conducted under the protocol includes funding from the National Institutes of  
1698 Health.

### 1699 **17.2 Costs to the Participant**

1700 In sites and countries where health insurance is applicable, participant health insurance may be  
1701 billed for the costs of medical care and activities occurring outside this protocol. If their insurance  
1702 does not cover these costs or participants do not have insurance, these costs will be participant  
1703 responsibility.

1704 Activities of the sub studies may take advantage of standard of care activities for collecting  
1705 information, such as at routine follow-up visits. Such visits will generally be charged to insurance  
1706 unless the visit is required only for the research. At mixed visits where both research and clinical  
1707 care occur such as for inpatients enrolled in this trial, clinical care will generally be charged to  
1708 insurance.

**1709 18 Appendix A: Primary study outcomes****1710 18.1 Approach to ascertainment and verification of outcomes**

1711 Outcomes will be assessed locally and will not be centrally adjudicated unless specified in the arm-  
1712 specific appendix. Outcomes should be assessed by a local investigator or other qualified study  
1713 team member who is blinded to treatment assignment.

**1714 18.2 Primary outcome: Oxygen free days**

1715 The primary outcome for this platform is oxygen free days through day 28 (OFD). OFD is a clinically  
1716 relevant, longitudinal measure of lung function and mortality for the first 28 days after  
1717 randomization. OFD will be calculated using principles developed during the past 20 years for other  
1718 free-day clinical trial outcomes, including ventilator free days,<sup>35,36</sup> organ support free days,<sup>37</sup> and  
1719 hospital free days.<sup>38</sup> Free-day outcomes have also been successfully utilized in COVID-19 clinical  
1720 trials.<sup>39</sup>

1721  
1722 OFD will be calculated as the number of calendar days during the first 28 days after randomization  
1723 during which the patient was alive and not receiving supplemental oxygen by nasal cannula, face  
1724 mask, high flow nasal cannula (HFNC), non-invasive ventilation (NIV), invasive mechanical  
1725 ventilation (IMV), or extracorporeal membrane oxygenation (ECMO). The day of randomization is  
1726 denoted as Day 0. Starting with calendar day 1 (the day after randomization) and continuing for 28  
1727 days, study personnel will document whether supplemental oxygen therapy was received for any  
1728 duration. While the patient is in the hospital, the highest level of respiratory support will be classified  
1729 daily according to the 8-category WHO COVID-19 clinical status scale (Table 3).<sup>50</sup> Calendar days  
1730 on which the patient received supplemental oxygen (category 4), HFNC or NIV (category 5), or IMV  
1731 or ECMO (categories 6 and 7) will be classified as a day with oxygen use.

1732  
1733 After hospital discharge, patients will be assessed for home oxygen use via serial telephone follow-  
1734 up calls to the patient or surrogate. During these calls, study personnel will assess for new home  
1735 oxygen use with the following questions:

- 1736 (1) Were you discharged from the hospital on oxygen?  
1737 (2) Did you use oxygen at any time after hospital discharge?  
1738 (3) Are you still using oxygen?  
1739 (4) If you received oxygen at any time after hospital discharge and are no longer on oxygen,  
1740 what was the last day you used oxygen at home?

1741  
1742 Patients who chronically used supplemental oxygen prior to their COVID-19 illness will be  
1743 considered oxygen free when they return to the same level of oxygen support, they had been using  
1744 prior to COVID-19 illness. For example, a patient who chronically used supplemental oxygen at 4  
1745 liters per minute via nasal cannula before COVID-19 and who was intubated for acute management  
1746 of COVID-19 would be considered oxygen free for calculation of the primary outcome when he/she  
1747 returned to oxygen support via nasal cannula at 4 liters per minute or less.

1748  
1749 Data collected reflecting the patient's status after day 28 will not be used for the calculation of OFD.  
1750 OFD will be calculated as 28 minus the number of days with supplemental oxygen use during the  
1751 first 28 days following randomization. OFD will be coded as -1 for patients who died before study  
1752 day 28. Hence, the range for OFD is from -1 to 28 days. Examples of OFDs are shown in Table 4.  
1753 Some patients will enter the trial with supplemental oxygen use (enrolled while in WHO category 4,  
1754 5, 6 or 7), while others will enter the trial without oxygen therapy (enrolled while in WHO category  
1755 3).

ACTIV-4 Host Tissue  
Protocol Version: 1.8 dated 2021.12.17.

1756

| <b>Table 3.</b> WHO COVID-19 Clinical Status Scale and its use for enrollment eligibility and calculation of oxygen free days (OFD). The baseline (pre-randomization) clinical status will be used to determine eligibility for enrollment. Clinical status will be scored every day the patient is in the hospital through day 28; these daily scores will be used to calculate OFD. |                                                                                                               |                                                                       |                                                                                                                                                                                            |
|---------------------------------------------------------------------------------------------------------------------------------------------------------------------------------------------------------------------------------------------------------------------------------------------------------------------------------------------------------------------------------------|---------------------------------------------------------------------------------------------------------------|-----------------------------------------------------------------------|--------------------------------------------------------------------------------------------------------------------------------------------------------------------------------------------|
| <b>Category</b>                                                                                                                                                                                                                                                                                                                                                                       | <b>Category Description</b>                                                                                   | <b>Notes for eligibility (baseline status)</b>                        | <b>Notes for OFD calculation (daily status on days 1 – 28)</b>                                                                                                                             |
| 1                                                                                                                                                                                                                                                                                                                                                                                     | Not hospitalized without limitation in daily activity                                                         | Patients in category 1 at baseline are not eligible for enrollment.   | Classified as oxygen free day                                                                                                                                                              |
| 2                                                                                                                                                                                                                                                                                                                                                                                     | Not hospitalized with limitation in daily activity or home oxygen use                                         | Patients in category 2 at baseline are not eligible for enrollment.   | Days with home oxygen use are classified as days with supplemental oxygen. Days at home with limitations in daily activity but with no home oxygen use are classified as oxygen free days. |
| 3                                                                                                                                                                                                                                                                                                                                                                                     | Hospitalized not on supplemental oxygen                                                                       | Patients in category 3 at baseline are not eligible for enrollment.   | Classified as oxygen free day after enrollment                                                                                                                                             |
| 4                                                                                                                                                                                                                                                                                                                                                                                     | Hospitalized on standard supplemental oxygen via nasal cannula or mask                                        | Eligible for enrollment                                               | Classified as day with supplemental oxygen use                                                                                                                                             |
| 5                                                                                                                                                                                                                                                                                                                                                                                     | Hospitalized on high-flow nasal cannula or non-invasive ventilation                                           | Eligible for enrollment                                               | Classified as day with supplemental oxygen use                                                                                                                                             |
| 6                                                                                                                                                                                                                                                                                                                                                                                     | Hospitalized on invasive mechanical ventilation without other organ support                                   | Eligible for enrollment                                               | Classified as day with supplemental oxygen use                                                                                                                                             |
| 7                                                                                                                                                                                                                                                                                                                                                                                     | Hospitalized on invasive mechanical ventilation and other organ support (including vasopressors, RRT or ECMO) | Eligible for enrollment                                               | Classified as day with supplemental oxygen use                                                                                                                                             |
| 8                                                                                                                                                                                                                                                                                                                                                                                     | Death                                                                                                         | Patients who die before randomization are not eligible for enrollment | Death at any time prior to the earlier of hospital discharge or day 28 is coded as -1 OFD                                                                                                  |

1757  
1758  
1759  
1760  
1761  
1762  
1763  
1764

| <b>Table 4.</b> Descriptions of OFD data.                                                                                                                                                                                                                     |                   |                                                                                                                                                                                                                                                                                             |
|---------------------------------------------------------------------------------------------------------------------------------------------------------------------------------------------------------------------------------------------------------------|-------------------|---------------------------------------------------------------------------------------------------------------------------------------------------------------------------------------------------------------------------------------------------------------------------------------------|
|                                                                                                                                                                                                                                                               | <b>OFD (days)</b> | <b>Description</b>                                                                                                                                                                                                                                                                          |
| <div style="display: flex; flex-direction: column; align-items: center;"> <div style="margin-bottom: 10px;"><b>More Severe</b></div> <div style="margin-bottom: 10px;">↑</div> <div style="margin-bottom: 10px;">↓</div> <div><b>Less Severe</b></div> </div> | -1                | Patient died before the end of day 28.                                                                                                                                                                                                                                                      |
|                                                                                                                                                                                                                                                               | 0                 | Patient survived through day 28 and had oxygen use on every calendar day between day 1 and day 28.                                                                                                                                                                                          |
|                                                                                                                                                                                                                                                               | 1                 | Patient survived through day 28 and was free from oxygen use for 1 calendar day in the first 28 days following randomization. The patient was on nasal cannula, face mask, HFNC, NIV, IMV or ECMO on 27 of the first 28 calendar days following randomization.                              |
|                                                                                                                                                                                                                                                               | 10                | Patient survived through day 28 and was free from oxygen use for 10 days in the first 28 days following randomization. The patient was on nasal cannula, face mask, HFNC, NIV, IMV or ECMO on 18 of the first 28 calendar days following randomization.                                     |
|                                                                                                                                                                                                                                                               | 25                | Patient survived through day 28 and was free from oxygen use for 25 days in the first 28 days following randomization. The patient was on nasal cannula, face mask, HFNC, NIV, IMV or ECMO on 3 of the first 28 calendar days following randomization.                                      |
|                                                                                                                                                                                                                                                               | 28                | Patient survived through day 28 and was free from oxygen use on every calendar day after the day of randomization (Day 0) for the first 28 days of follow-up. The patient did not receive oxygen by nasal cannula, face mask, HFNC, NIV, IMV, or ECMO at any time between day 1 and day 28. |

1765

1766 **18.3 Definitions**

1767

1768 **18.3.1 ICU Level of care**

1769 Defined as planned admission to ICU.

1770 **18.3.2 Myocardial injury**

1771 Myocardial injury will be defined as an increase in troponin above the 99<sup>th</sup> percentile with or without  
 1772 ECG changes consistent with ischemia. This diagnosis is made locally.

1773 **18.3.3 Acute Kidney Injury**

1774 Acute kidney injury after enrollment is defined by KDIGO criteria for Acute Kidney Injury in the  
 1775 setting of not meeting these criteria upon enrollment. We will define AKI as Stage 2 or higher for  
 1776 purposes of our AKI outcome:

1777 THREE STAGES:

- 1778 • Stage 1: Serum Cr 1.5–1.9 times baseline, OR ≥ 0.3 mg/dl increase in serum Cr
- 1779 • Stage 2: Serum Cr 2.0–2.9 times baseline
- 1780 • Stage 3: Serum Cr ≥ 3.0 times baseline OR Increase in serum creatinine to ≥ 4.0mg/dl, OR
- 1781 Initiation of renal replacement therapy
- 1782

1783 **18.3.4 Disseminated Intravascular Coagulation (DIC) (Overt) – DIC score ≥ 5**

- 1784 1. Platelet count ≥ 100 K (0); 50–100K (1 point); < 50K (2 points)

ACTIV-4 Host Tissue

Protocol Version: 1.8 dated 2021.12.17.

- 1785            **2.** Elevated D-dimer: no increase (0 points); moderate increase (1 point); severe increase (3  
1786            points) according to local criteria.  
1787            **3.** Prolonged PT < 3 seconds (0 points); 3–6 seconds (1 point); ≥ 6 seconds (2 points)  
1788            **4.** Fibrinogen level ≥ 100 (0 points); < 100 (1 point) mg/dL

1789

1790    **18.3.5 ISTH Defined Major Bleeding**

1791    Bleeding that:

- 1792            **1.** Resulted in death,  
1793            **2.** Occurred in a critical organ (intracranial, intraspinal, intraocular, retroperitoneal,  
1794            intraarticular, intramuscular with compartment syndrome, or pericardial), or  
1795            **3.** Associated with either a decrease in the hemoglobin level of at least 2 g per deciliter or a  
1796            transfusion of at least 2 units of packed red cells  
1797

**1798 19 Appendix B: Data and Safety Monitoring Plan****1799 19.1 Overview**

1800 The purpose of a monitoring plan is to facilitate compliance with good clinical practice guidelines  
1801 and federal regulations by: documenting a plan for verifying that the rights and well-being of  
1802 participants are protected; the reported trial data are accurate, complete and verifiable from source  
1803 documents; the confidentiality of participant data is maintained; serious adverse events and  
1804 unanticipated problems are adequately addressed; and the trial is conducted in compliance with the  
1805 protocol, prevailing SOPs, federal regulations, and other relevant requirements. The full Data and  
1806 Safety Monitoring plan is described in detail in a separate document. The scope and content of this  
1807 monitoring plan is based on the objective, purpose, design, and complexity of this platform, which is  
1808 a multi-arm, blinded, randomized placebo-controlled trial. The safety profile of the selected agents  
1809 being considered for this platform is based on prior clinical trials in patients with acute illness, both  
1810 COVID-19 and non-COVID-19 related. Thus, a monitoring approach of surveillance and reporting of  
1811 serious adverse events is sufficient. The trial is designed to enroll subjects at multiple sites, to  
1812 include within-site randomization. A comprehensive project and data management system is in  
1813 place to support real-time review of regulatory compliance, screening, enrollment, and data integrity  
1814 with automated reporting to the study team. A risk management plan will also be deployed.  
1815 Intensive patient monitoring in the clinical setting during and immediately following treatment is  
1816 planned. These features mitigate risks from conduct of the trial and suggest verification of consent,  
1817 eligibility, and primary outcomes with targeted verification of other data are sufficient to ensure  
1818 study integrity and protection of the rights and welfare of participants. The data and safety  
1819 monitoring plan will be approved by the DSMB prior to enrolling patients in this trial. The details of  
1820 the scope of monitoring, monitoring personnel, site visits (remote and in-person) are delineated in  
1821 the separate DSMP document.

1822

1823

ACTIV-4 Host Tissue  
Protocol Version: 1.8 dated 2021.12.17.

1824 **20 Appendix C: Minimum Biological Specimen collection**

1825 Baseline specimens to be collected

1826 Sample Processing

1827 Biorepository

1828

1829 **Blood collection times (4 total timepoints):**

- 1830 • Baseline—at time of randomization (Study Day 0).
- 1831 • Two time points on study drug (Study Day 1 ± 1 day and Study Day 3 ± 1 day)
- 1832 • Within 2-36 hours after inpatient study treatment ends

1833

1834 **Standard samples to be collected & volumes at each time point:**

- 1835 • Plasma – 30.4 mL
- 1836 • Serum – 6 mL
- 1837 • Total blood collection at each time point = 36.4 mL
- 1838 ○

1839 **Peptides/enzymes to be measured at each time point (pending funding):**

- 1840 • 1<sup>st</sup> priority:
  - 1841 ○ Ang-(1-7), Ang II, NT-proBNP and hsTn, (plasma, collected in pretreated tubes)
  - 1842 ○ ACE, ACEII activity and level, (serum)
- 1843 • 2<sup>nd</sup> priority:
  - 1844 ○ Renin, Ang I, Nephilysin, Prolyl oligopeptidase

1845

1846 **Supplies:**

- 1847 • Source – The University of Vermont: packages sent to sites with EDTA plasma tubes
- 1848 (inhibitor cocktail) including labels and special tubes
- 1849 • Sites – Batch shipping (overnight on dry ice)

1850

1851 **Note 1:** *We anticipate that some sites may not be able to collect & process all the samples and time*

1852 *points listed above. We plan to work with those sites to identify more limited time points and/or*

1853 *discarded samples that could be collected, processed, and sent to the biorepository.*

1854 **Note 2:** *If a participant's blood specimens are unable to be obtained at the timepoints outlined in*

1855 *the protocol due to unforeseen circumstances such as a non-functioning IV, or the patients desire to*

1856 *not have blood drawn, this will not be considered a protocol violation.*

1857

1858

1859 **21 Appendix D: Arm 1: TXA127, Angiotensin-(1-7), (Ang1-7)**

1860 **21.1 Description of active therapy**

1861 *TXA127/Ang(1-7) is an investigational peptide agonist of Mas receptors. TXA127/Ang(1-7) can be*  
 1862 *administered by intravenous (IV) infusion or subcutaneous injection and has a short half-life (t1/2*  
 1863 *~30 min).<sup>51</sup> TXA127/Ang(1-7) will be used in this proposal. It is a pharmaceutical preparation of Ang*  
 1864 *(1-7) produced by Constant Therapeutics Inc., which will be dosed via IV infusion 0.5 mg/kg daily*  
 1865 *infused over 3 hours per day for 5 days. TXA127/Ang(1-7) has been dosed in approximately 100*  
 1866 *participants in approximately 10 trials.*

1867 **21.2 Rationale for evaluating Ang(1-7)**

1868 Ang(1-7) is the catalytic product of ACE2, which serves as a hormonal counterbalance for its  
 1869 precursor, AngII. Ang(1-7) acts through the MAS receptor and is anti-inflammatory, antithrombotic,  
 1870 and inhibits plaque formation (Figure 3).<sup>17</sup> SARS spike protein interacting with ACE2 causes lung  
 1871 failure independent of virus transmission in mice.<sup>52</sup> This could be a result of a lack of Ang1-7 to  
 1872 counterbalance AngII. Ang(1-7) is currently being tested in two other COVID-19 clinical trials  
 1873 (NCT04401423 and NCT04605887).  
 1874

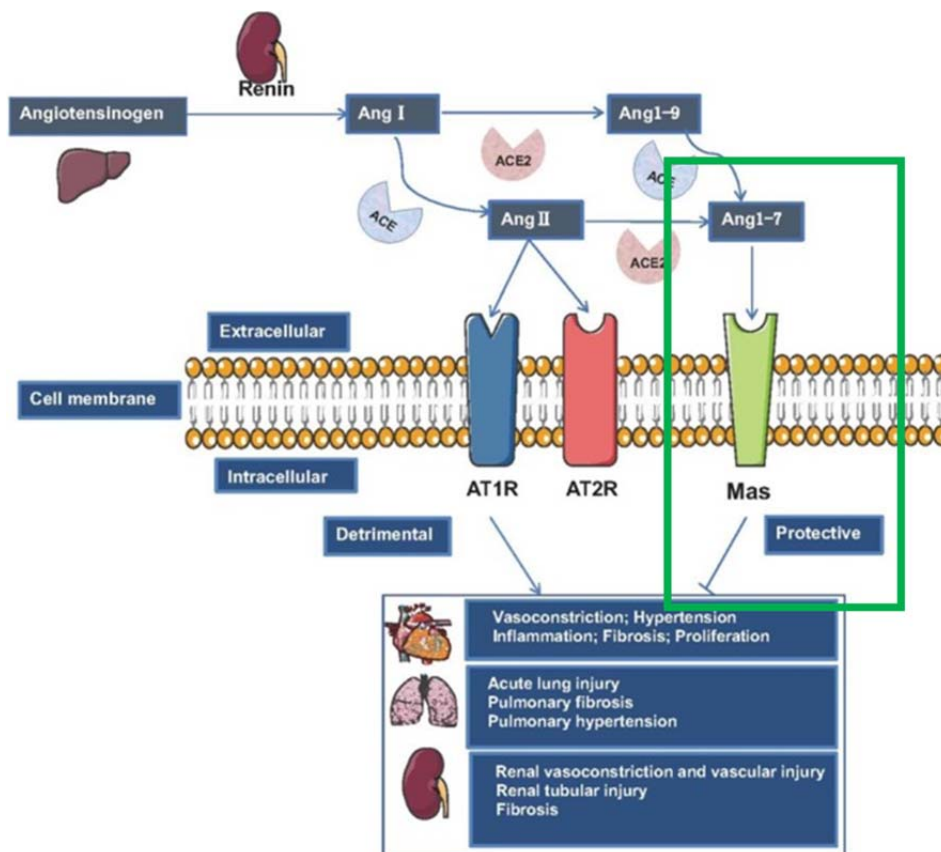

1875 **Figure 3. Potential protective effect of Ang(1-7) (from Liu et al. 2020)<sup>17</sup>**  
 1876

1877 **21.3 TXA127/Ang (1-7) dose, duration, and route of administration**

1878 TXA127 0.5 mg/kg/day infused 3 hours daily for 5 days or until hospital discharge, whichever  
 1879 comes first.



ACTIV-4 Host Tissue  
Protocol Version: 1.8 dated 2021.12.17.

1880 There is no known interaction of TXA127/Ang(1-7) with current SOC treatments, so drugs can be  
1881 given at the same time in separate lines. However, if separate, dedicated lines are not possible, the  
1882 dosing of TXA127/Ang(1-7) may be paused. If the infusion needs to be paused, the infusion can be  
1883 restarted at any time within the 7 hour viability of the prepared drug (after preparing TXA127/Ang(1-  
1884 7) for IV administration in VIAFLEX bag, the drug is stable for 4hr in the refrigerator + 3hr during  
1885 administration, a total of 7hr viability).

#### 1886 **21.4 Placebo**

1887 Commercially available, sterile saline will be supplied and masked by an unblinded pharmacist at  
1888 each study site to serve as the matching placebo for TXA127; TXA127 prepared in sterile saline for  
1889 infusion is a clear, colorless solution.

#### 1890 **21.5 TXA127/Ang (1-7) -specific safety concerns and potential medication interactions**

1891 Adverse events reported in human clinical trials of Ang(1-7) include injection site pain, bone pain,  
1892 abdominal pain, constipation, dry mouth, gingivitis, oral pain, diarrhea, thirst, tremors, rash,  
1893 neutropenia, and anemia. There are no known contraindications for administration of TXA127.  
1894 However, the effect of TXA-127 on renal function is not completely known. The current ongoing  
1895 Phase II trial (NCT04605887) excludes patients with eGFR < 30 mL/min/1.73m<sup>2</sup>.

##### 1896 TXA127-specific exclusion criteria:

- 1897 1. Patient unable to participate or declines participation in the TXA127/Ang(1-7) arm.
- 1898 2. History of sensitivity (including angioedema) or allergic reaction to medication targeting the  
1899 RAAS system including study medications or other allergy in the opinion of the investigator that  
1900 contraindicates participation (not applicable to fostamatinib arm)
- 1901 3. Hemodynamic instability - defined as MAP < 65 mmHg at time of randomization confirmed  
1902 on two measurements 5 minutes apart OR vasopressors at or above norepinephrine equivalent of  
1903 0.1 mcg/kg/min in prior 4 hours to maintain MAP > 65 mmHg.
- 1904 4. Known severe renal artery stenosis.
- 1905 5. Known significant left ventricular outflow obstruction, such as obstructive hypertrophic  
1906 cardiomyopathy or severe aortic or mitral stenosis.
- 1907 6. Randomized in another trial evaluating RAAS modulation in the prior 30 days

1908 For regulatory reporting purposes, including identification and potential expedited reporting of  
1909 'SUSAR' events, the following serious and/or non-serious Adverse Events/Reactions are  
1910 considered expected for this study:

- 1911 • Hypotension

##### 1912 TXA127/Ang(1-7) stopping criteria:

- 1913 1. Worsening hypotension, defined as need for initiation (if not already on) of vasopressors  
1914 at a dose of 0.1 mcg/kg/min norepinephrine equivalent or doubling of vasopressor dose based on  
1915 the dose at the start of randomization to maintain MAP > 65 mmHg. Patients are able to restart  
1916 study medication if the patient maintains MAP > 65 mmHg for 4 hours with no change in  
1917 vasopressor dose (and below 0.1 mcg/kg/min norepinephrine equivalent)
- 1918 2. AAKI- new RRT at any point during study drug administration
- 1919 3. Angioedema or other serious allergic reaction
- 1920 4. Hospital discharge in those patients randomized to an arm requiring intravenous  
1921 administration

1922 Study drug will not be restarted for angioedema or serious allergic reaction.

1927  
1928**22 Appendix E: Arm 2: TRV027**

1929

**22.1 Description of active therapy**

1930 TRV027 is an investigational peptide in clinical development by Trevena. It is administered as an IV  
1931 infusion. There were no significant differences in safety outcomes between TRV027 and placebo in  
1932 a 621-patient trial of patients with acute heart failure. It is currently being investigated in a  
1933 randomized trial of 60 patients hospitalized with COVID-19 to determine differences in D-dimer from  
1934 baseline to day 8 between TRV027 and placebo (NCT04419610). The safety profile specific to  
1935 COVID-19 is still under investigation.

1936

**22.2 Rationale for evaluating TRV027**

1937 SARS-CoV-2 sequesters ACE2, shifting balance to more AngII and less Ang(1-7).<sup>53</sup> TRV027 blocks  
1938 overactivation of AT<sub>1</sub> by AngII, which may ameliorate vascular pathology, inflammation, fibrosis, and  
1939 aldosterone.<sup>54</sup> TRV027 also mimics Ang(1-7) binding via activation of the Beta Arresting pathway,  
1940 which may induce vasodilation and facilitate anti-inflammatory and anti-fibrotic activity.<sup>55</sup> Thus it  
1941 may have additive therapeutic benefit when compared to Ang(1-7) alone by both blocking AngII and  
1942 activating Ang(1-7) like properties. The current randomized, placebo-controlled trial in 60 patients  
1943 hospitalized with COVID-19 is evaluating the safety of TRV027 and its impact on mean changes in  
1944 D-dimer values between study arms after 7 days of TRV027 treatment. (NCT04419610)

1945

**22.3 TRV027 dose, duration, and route of administration**

1946 TRV027 12 mg/h as a continuous 24-hour infusion, infused 5 days or until hospital discharge,  
1947 whichever comes first.

1948

**22.4 Placebo**

1949 Commercially available, sterile saline will be supplied and masked by an unblinded pharmacist at  
1950 each study site to serve as the matching placebo for TRV027; TRV027 prepared in sterile saline for  
1951 infusion is a clear, colorless solution.

1952

**22.5 TRV027 therapy-specific safety concerns and potential medication interactions**

1953 Adverse events reported in a phase I and IIb trial of TRV027 include eye irritation, abdominal  
1954 distension, arthralgia, headache, hypokalemia, hypotension, muscle twitching, dizziness,  
1955 paresthesia, and tremor. There are theoretical concerns of decreased efficacy of TRV027 in  
1956 patients already receiving an oral angiotensin receptor blocker (ARB) as an outpatient.

1957

**TRV027-specific exclusion criteria:**

- 1958
- 1959 1. Participants on ARBs will be excluded from this study arm.
  - 1960 2. Patient unable to participate or declines participation in the TRV027 arm.
  - 1961 3. History of sensitivity (including angioedema) or allergic reaction to medication targeting the  
1962 RAAS system including study medications or other allergy in the opinion of the investigator that  
1963 contraindicates participation (not applicable to fostamatinib arm)
  - 1964 4. Hemodynamic instability - defined as MAP < 65 mmHg at time of randomization confirmed  
1965 on two measurements 5 minutes apart OR vasopressors at or above norepinephrine equivalent of  
1966 0.1 mcg/kg/min in prior 4 hours to maintain MAP > 65 mmHg.
  - 1967 5. Known severe renal artery stenosis.
  - 1968 6. Known significant left ventricular outflow obstruction, such as obstructive hypertrophic  
1969 cardiomyopathy or severe aortic or mitral stenosis.

ACTIV-4 Host Tissue  
Protocol Version: 1.8 dated 2021.12.17.

1970 7. Randomized in another trial evaluating RAAS modulation in the prior 30 days

1971

1972 For regulatory reporting purposes, including identification and potential expedited reporting of  
1973 'SUSAR' events, the following serious and/or non-serious Adverse Events/Reactions are  
1974 considered expected for this study:

1975 • Hypotension

1976 TRV027 stopping criteria:

1977 1. Worsening hypotension, defined as need for initiation (if not already on) of vasopressors  
1978 at a dose of 0.1 mcg/kg/min norepinephrine equivalent or doubling of vasopressor dose  
1979 based on the dose at the start of randomization to maintain MAP > 65 mmHg. Patients are  
1980 able to restart study medication if the patient maintains MAP > 65 mmHg for 4 hours with no  
1981 change in vasopressor dose (and below 0.1 mcg/kg/min norepinephrine equivalent).

1982 2. AKI- new RRT at any point during study drug administration

1983 3. Angioedema or other serious allergic reaction

1984

1985 4. Hospital discharge in those patients randomized to an arm requiring intravenous  
1986 administration

1987

1988 Study drug will not be restarted for angioedema or serious allergic reaction.

1989

1990 **23 Appendix F: Arm 3: Fostamatinib**

1991 **23.1 Description of active therapy**

1992 Fostamatinib is an oral spleen tyrosine kinase inhibitor FDA approved for the treatment of adult  
 1993 patients with chronic immune thrombocytopenia (ITP) who have had insufficient response to previous  
 1994 treatment. Fostamatinib is a prodrug with an active metabolite, R406. R406 is protein bound and has a  
 1995 half-life of 15 hours, with 80% of excretion occurring in feces and 20% excreted in urine.

1996 **23.2 Rationale for evaluating Fostamatinib**

1997 Spleen tyrosine kinase is a cytoplasmic tyrosine kinase that signals through Fc receptors, B-cell  
 1998 receptors, and c-type lectin receptors. Robust antibody responses are associated with severe  
 1999 disease in COVID-19 and may drive thromboinflammation. *In vitro* evidence suggests, R406, the  
 2000 active component of fostamatinib, can inhibit the release of cytokines by macrophages and platelet-  
 2001 mediated thrombosis provoked by SARS-CoV-2 specific spike antigen/antibody complexes. R406  
 2002 also inhibits the release of neutrophil extracellular traps from neutrophils stimulated with plasma  
 2003 from patients with COVID-19, ultimately resulting in decreasing immunothrombosis. A recent  
 2004 placebo-controlled randomized phase 2 study in hospitalized adults with Covid-19 (NCT04579393)  
 2005 suggested fostamatinib in addition to usual care was safe and did not result in more serious  
 2006 adverse events (10.5% in the fostamatinib group vs. 22% in the placebo group). Additionally,  
 2007 multiple secondary efficacy endpoints showed trends favoring the patients receiving fostamatinib,  
 2008 including 28-day mortality, days free of oxygen, and recovery as measured on the 8-point ordinal  
 2009 scale at day 15.  
 2010

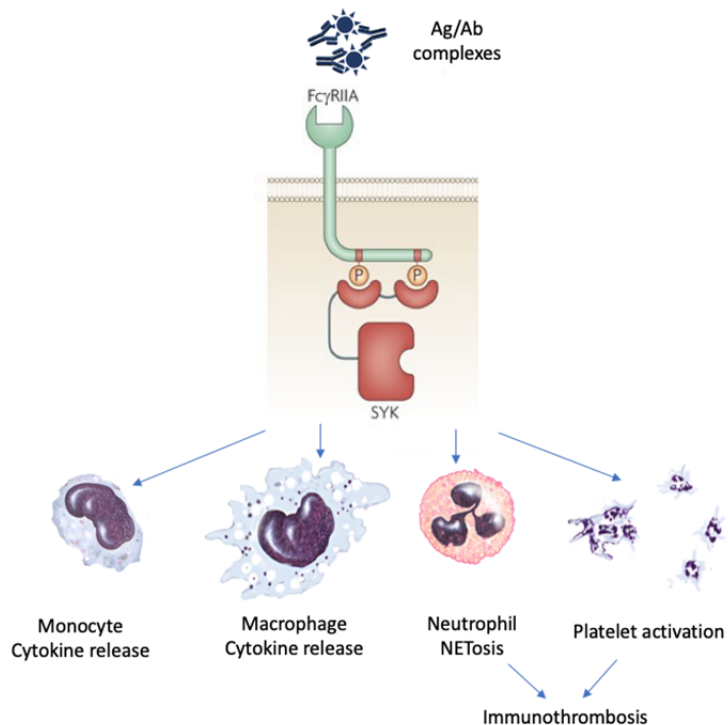

2011  
 2012

**Figure 4. Spleen tyrosine kinase inhibition in COVID-19** (Strich, Generated using Biorender)

**23.3 Fostamatinib dose, duration, and route of administration**

We will use a study dose of 150mg orally twice daily for 14 days (28 doses). This regimen was studied in the recently completed phase 2 trial in patients hospitalized with COVID-19. . The dose may be modified to 100mg according to pre-defined criteria in section 22.17 (Dose Modification Considerations and Medication Interactions). Study medication will be continued as an outpatient if the patient is discharged prior to completing 28 doses. If necessary, in patients unable to swallow, tablets can be crushed until granular with an approximate particle size <2 mm, added to approximately 10 mL of water, and stirred to mix before administration through an enteral tube.

While many patients on BiPAP can safely receive oral medications, it may be potentially unsafe to administer oral medications to patients at certain times while they are receiving BiPAP therapy due to risk of hypoxemia if the mask is removed and/or risk of aspiration if an oral medication is administered and BiPAP is immediately re-initiated. Determining whether an oral medication should be given to a patient receiving BiPAP therapy is a bedside clinical decision.

The goal is to administer two doses of study medication each calendar day and approximately 12 hours apart from one another. If the time between study medication doses needs to be reduced, the recommendation is to administer two doses at least 4 hours apart from one another. If a dose of study medication is entirely skipped, a missed dose should be noted in the electronic data capture system (REDCap). Skipped doses are not “made up” by extending the dosing period; patients should only receive study drug for a maximum of 14 days, starting with randomization.

**23.4 Placebo**

The drug product is provided by Rigel Pharmaceuticals, Inc., and consists of 2 strengths of orange film-coated, plain, bioconvex tablets. The 150 mg tablet is oval, and the 100 mg tablet is round. The tablets are supplied in white opaque high-density polyethylene bottles capped with white polypropylene child resistant closures with foil induction seals. Placebo tablets to match fostamatinib 100 mg and 150 mg will be provided by Rigel Pharmaceuticals, Inc. An unblinded pharmacist at each study site will dispense and record randomization and treatment assignment.

**23.5 Fostamatinib-specific safety considerations and potential medication interactions**

Fostamatinib has a consistent safety profile, with the most common adverse reactions ( $\geq 5\%$  and more than placebo) being diarrhea, hypertension, nausea, respiratory infection, dizziness, ALT/AST increase, rash, abdominal pain, fatigue, chest pain and neutropenia. Warnings and precautions included in the US product label include hypertension, elevated liver function tests, diarrhea, neutropenia, and embryo-fetal toxicity.

Concomitant use with strong CYP3A4 inhibitors with fostamatinib will increase exposure to R406 that may result in increased risk of adverse reactions, while concomitant use of strong CYP3A4 inducers reduces exposure to R406. Therefore, investigators are advised to avoid concomitant use of strong CYP3A4 modulators (both inhibitors and inducers) listed in the Table below. These patients will be excluded from the Fostmatinib arm and patients randomized to the Fostamatinib arm (regardless of placebo/active assignment) will be monitored to ensure these medications are not used. No other medications will be excluded or monitored.

| Strong CYP3A4 Inhibitors | Strong CYP3A4 Inducers |
|--------------------------|------------------------|
| Clarithromycin           | Carbamazepine          |
| Indinavir                | Efavirenz              |
| Itraconazole             | Enzalutamide           |
| Ketocanazole             | Modafinil              |
| Nefazodone               | Nevirapine             |
| Nelfinavir               | Oxcarbazepine          |
| Ritonavir                | Phenobarbital          |
| Saquinavir               | Phenytoin              |
| Telithromycin            | Rifabutin              |
| Troleandomycin           | Rifampin               |
|                          | St. John's Wort        |
|                          | Troglitazone           |

**Table 5:** Avoid concomitant use of fostamatinib and these strong CYP3A4-related drugs identified from <https://drug-interactions.medicine.iu.edu/MainTable.aspx>.

All participants who are randomized to this arm should refrain from drinking alcohol while taking study drug. Once discharged, subjects of childbearing potential should avoid pregnancy through abstinence or use of at least one contraceptive method until 7 days after last day of study drug.

### 23.6 Fostamatinib Arm-Specific Exclusion Criteria

The following **exclusion criteria** differ from the master protocol criteria:

1. Randomized in another trial evaluating fostamatinib in the prior 30 days

#### Study arm exclusion Criteria measured within 24 hours prior to randomization:

1. AST or ALT  $\geq 5 \times$  upper limit of normal (ULN) or ALT or AST  $\geq 3 \times$  ULN and total bilirubin  $\geq 2 \times$  ULN
2. SBP > 160 mmHg or DBP > 100 mmHg at the time of screening and randomization
3. ANC < 1000/mL
4. Patient requires use of strong CYP3A modulators from Table above (Clarithromycin, Indinavir, Itraconazole, Ketoconazole, Nefazodone, Nelfinavir, Ritonavir, Saquinavir, Telithromycin, Troleandomycin, Carbamazepine, Efavirenz, Enzalutamide, Modafinil, Nevirapine, Oxcarbazepine, Phenobarbital, Phenytoin, Rifabutin, Rifampin, St. John's Wort, or Troglitazone).
5. Patient unable to participate or declines participation in the fostamatinib arm.

### 23.7 Dose Modification Considerations and Medication Interactions

**Dose Modifications:** The following dose modifications will be utilized in patients randomized to the fostamatinib arm (active or placebo). Those patients who have doses held will only complete 14 days (up to 28 doses) of study treatment. Dosing will not extend beyond day 14. Blood pressure will be monitored daily in the hospital while on study drug up until the time of discharge.

#### **Hypertension:**

Blood pressure >140/90 should be treated with antihypertensives per usual care.

**During the inpatient hospitalization:** If systolic BP remains > 160 mmHg or diastolic BP > 100 mmHg or higher despite antihypertensive therapy, interrupt study drug. When restarting study drug once BP is below 160 mmHg systolic and 100 mmHg diastolic, drug dose should be reduced to 100 mg twice daily or matching placebo for the remainder of the study.

- **At the time of Hospital discharge:** Patients **still on study drug** at the time of hospital discharge will have the following study procedures performed (see Figure 5):

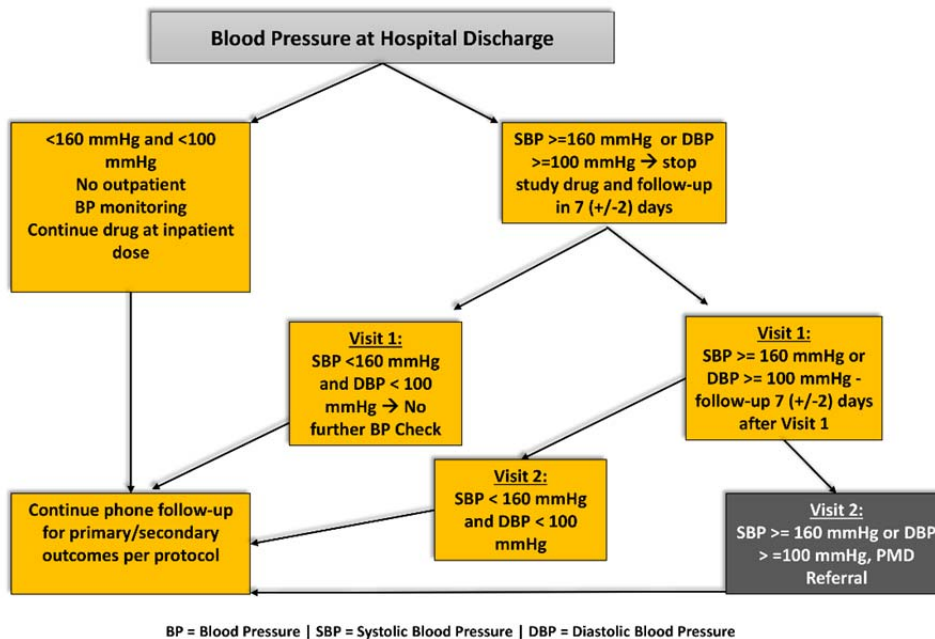

**Figure 5. Schematic overview of blood pressure considerations and procedures performed for patients still on study drug at the time of hospital discharge**

- 1) Those with SBP < 160 mmHg and DBP < 100 mmHg will continue on study drug at the inpatient dose and have no further BP measurements for study purposes
- 2) Those with SBP  $\geq$  160 mmHg or DBP  $\geq$  100 mmHg at the time of hospital discharge will have study medication stopped and undergo the following repeat testing:

- 1) 7 (+/-) days after post-hospital discharge a repeat blood pressure will be obtained.
  - a. If the SBP is < 160 mmHg and DBP is < 100 mmHg no further BP monitoring will be performed for study purposes
  - b. If the SBP is  $\geq$  160 mmHg or the DBP is  $\geq$  100 mmHg a follow-up will be performed in 7 (+/-) days after the prior visit
    - i. At the repeat visit if the SBP is < 160 mmHg and DBP is < 100 mmHg no further BP monitoring will be performed for study purposes
    - ii. At the repeat visit if the SBP is  $\geq$  160 mmHg or DBP is  $\geq$  100 mmHg study guidance will recommend BP recheck by a healthcare provider

#### **Hepatotoxicity:**

**Inpatient monitoring:** Liver function tests (LFT's) will be checked daily during hospitalization while on study drug.

- 2117 1) Study drug should be stopped if there is an increase in either:  
2118 a. AST or ALT greater than or equal to 5-times the upper limit of normal at the local lab  
2119 or for those with elevated AST and ALT at the time of enrollment an increase to 5-  
2120 times the level at enrollment  
2121 b. AST or ALT to greater than or equal to 3-times the upper limit of normal at the local  
2122 lab AND total bilirubin to greater than or equal to 2-times the upper limit of normal at  
2123 the local lab.

2124 Elevated unconjugated (indirect) bilirubin in absence of other LFT abnormalities – continue study  
2125 drug with frequent monitoring since isolated increase in unconjugated (indirect) bilirubin may be due  
2126 to UGT1A1 inhibition.  
2127

2128 **Outpatient monitoring:** Patients discharged while on study drug with AST/ALT or bilirubin elevated  
2129 > 2x the upper reference limits or up trending from most recent value (but less than the inpatient  
2130 stopping criteria) AND patients discharged not on study drug with either AST or ALT at least 3-times  
2131 the upper limit of normal or total bilirubin at least 2-times the upper limit of normal at the time of  
2132 discharge will have the following study procedures performed:  
2133

- 2134 1) 7 (+/-2) days post-hospital discharge a repeat measurement of AST, ALT and total bilirubin  
2135 will be obtained.

2136 a. Patients NOT on study drug at the time of repeat LFT measurement:

2137 \*If these repeat measurements are less than 3-times the upper limit of normal for AST or  
2138 ALT and less than 2-times the upper limit of normal for total bilirubin, then no further study  
2139 procedures will be performed related to LFT monitoring.

2140 \*If these repeat measurements are greater than 3-times the upper limit of normal for AST or  
2141 ALT or greater than 2-times the upper limit of normal for total bilirubin, then a repeat  
2142 measurement of AST, ALT and total bilirubin should be obtained 7 (+/-2) days later. If the  
2143 AST or ALT remain above 3-times the upper limit of normal or total bilirubin is above 2-times  
2144 the upper limit of normal after this repeat testing 7 days later, LFTs should be monitored per  
2145 standard of care by a provider or if no provider followed-up by the study team.

2146 b. Patients ON study drug at the time of repeat LFT measurement:

2147 \*If these repeat LFT measurements are below the upper reference limit of normal continue  
2148 study drug to completion and no recheck is needed.

2149 \*If these measurements remain above the upper reference limit of normal for either AST,  
2150 ALT or total bilirubin but do not meet inpatient stopping criteria (defined above), continue  
2151 study drug and a repeat measurement of AST, ALT and total bilirubin should be obtained 7  
2152 (+/-2) days later. If this repeat testing remains above the upper limit of normal for AST, ALT  
2153 or bilirubin it should be monitored per standard care by a provider or if no provider followed-  
2154 up by the study team.

2155 \*If study drug is stopped (per inpatient stopping rules above) repeat measurement of AST,  
2156 ALT and total bilirubin should be obtained 7 (+/-2) days later. If this repeat testing remains  
2157 above the upper limit of normal for AST, ALT or bilirubin it should be monitored per standard  
2158 care by a provider or if no provider followed-up by the study team.  
2159

2160 Once study drug is stopped for abnormal LFT values, the study drug will not be restarted.  
2161  
2162



2163  
 2164  
 2165

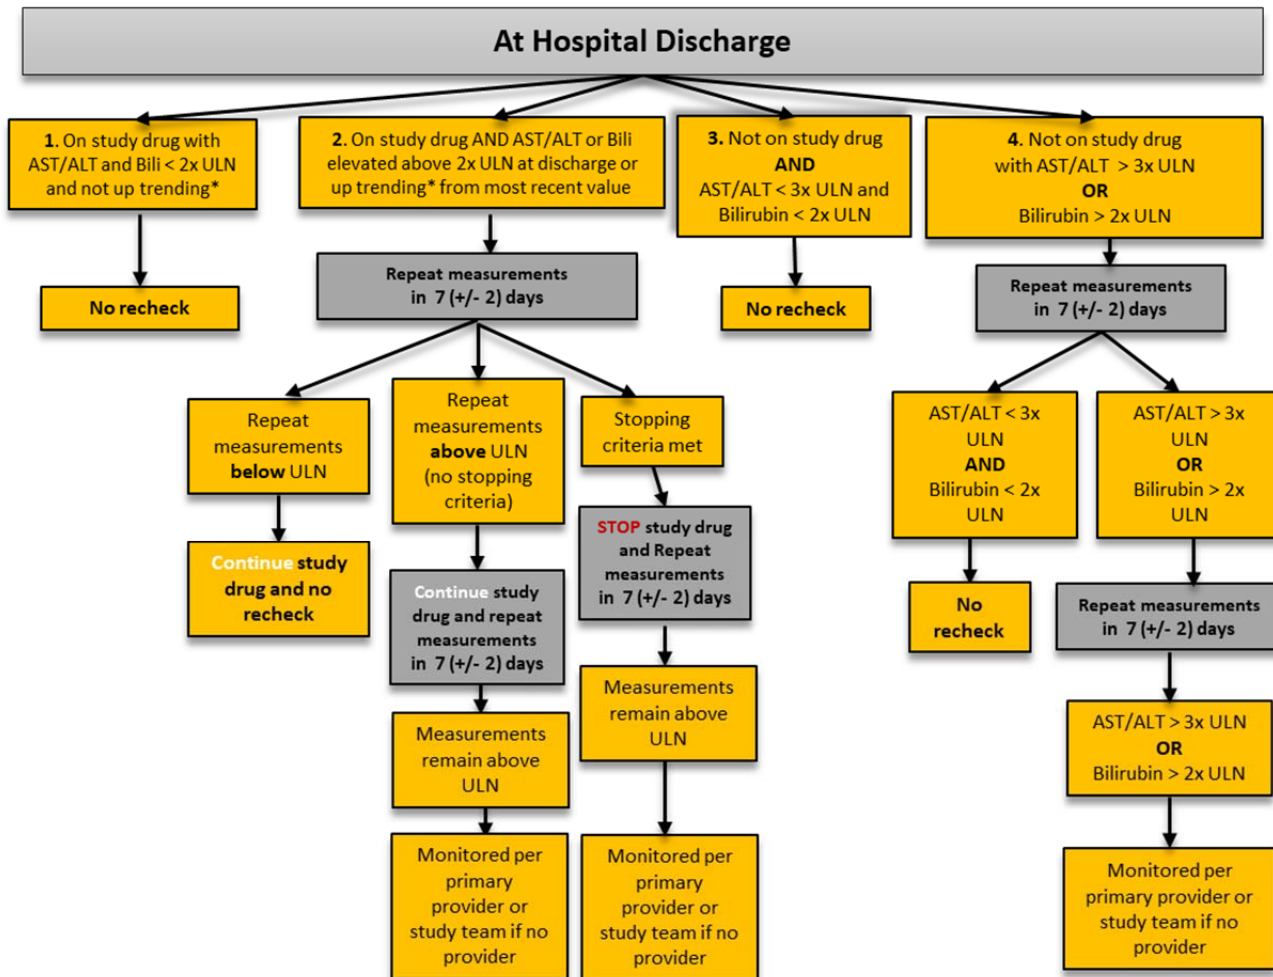

\*up trending is defined as a >25% increase in LFTs from the day prior

2166  
 2167

2168 **Diarrhea:** If symptoms become severe (grade 3 or above) while the patient is hospitalized,  
 2169 temporarily stop study drug until symptoms resolve to mild (grade 1). When restarting, study drug  
 2170 dose should be reduced to 100 mg twice daily or matching placebo for the remainder of the study.  
 2171 Study drug should be stopped if diarrhea becomes severe in the outpatient setting.

2172 **Neutropenia:** If the absolute neutrophil count (ANC) decreases to less than  $1.0 \times 10^9/L$ , the study  
 2173 drug should be discontinued. If the ANC returns to above  $1.0 \times 10^9/L$ , the study drug may be  
 2174 restarted. When restarting the study drug, the dose should be reduced to 100 mg twice daily or  
 2175 matching placebo for the remainder of the study.

2176  
 2177  
 2178 A CBC with differential will be checked daily while the patient is in the hospital and on study drug. If  
 2179 the patient is discharged with an  $ANC < 1.0 \times 10^9/L$  then a repeat CBC with differential will be

ACTIV-4 Host Tissue

Protocol Version: 1.8 dated 2021.12.17.

2180 performed within 7 days of hospital discharge. Those who are discharged with a normal ANC  
2181 require no further measurement after discharge.  
2182

2183 Medication Interactions:

2184 Patients will be monitored after randomization to ensure the following medications are not started  
2185 during study treatment: Clarithromycin, Indinavir, Itraconazole, Ketoconazole, Nefazodone,  
2186 Nelfinavir, Ritonavir, Saquinavir, Telithromycin, Troleandomycin, Carbamazepine, Efavirenz,  
2187 Enzalutamide, Modafinil, Nevirapine, Oxcarbazepine, Phenobarbital, Phenytoin, Rifabutin,  
2188 Rifampin, St. John's Wort, or Troglitazone  
2189

ACTIV-4 Host Tissue  
Protocol Version: 1.8 dated 2021.12.17.

2190 **23.8 Fostamatinib Arm Logistics**

2191 The use of fostamatinib for the proposed indication is investigational and the study will be  
2192 conducted under FDA IND #154000 and will cross reference IND #152131. Fostamatinib can be  
2193 stored at room temperature, 20°C to 25°C (68°F to 77°F); excursions permitted between 15°C to  
2194 30°C (59°F to 86°F). Rigel has adequate investigational product and placebo to enroll 300 active  
2195 and 300 placebo patients.

2196  
2197 For regulatory reporting purposes, including identification and potential expedited reporting of  
2198 'SUSAR' events, the following serious and/or non-serious Adverse Events/Reactions are among the  
2199 events that are considered expected for this study:

- 2200 • Neutropenia
- 2201 • Diarrhea
- 2202 • Elevated AST, ALT, or bilirubin
- 2203 • Hypertension

2204  
2205  
2206

ACTIV-4 Host Tissue  
 Protocol Version: 1.8 dated 2021.12.17.

| Date EUA* Updated (first issued) | Manufacturer                         | Diagnostic (Letter of Authorization)                             | PPA-Sensitivity                  | NPA-Specificity                    | Antigen                                        | Days since symptom onset |
|----------------------------------|--------------------------------------|------------------------------------------------------------------|----------------------------------|------------------------------------|------------------------------------------------|--------------------------|
| 13-Jan-2021<br>(02-Jul-2020)     | Becton, Dickinson and Company (BD)   | BD Veritor System for Rapid Detection of SARS-CoV-2              | 84%                              | 100%                               | nucleocapsid                                   | 5                        |
| (11-Jan-2021)<br>11-Jan-2021     | Ortho Clinical Diagnostics Inc.      | VITROS Immunodiagnostic Products SARS-CoV-2 Antigen Reagent Pack | 90.0%<br>(76.3–97.2%)            | 100%<br>(95% CI: 99.1–100.0%)      | nucleocapsid                                   | 7                        |
| 01-May-2021<br>(01-May-2021)     | Quanterix Corporation                | Simoa SARS-CoV-2 N Protein Antigen Test                          | 97.7 %<br>(95% CI: 92.03-99.72)  | 100%<br>(95% CI: 90.75-100.0)      | nucleocapsid                                   | 14                       |
| 23-Dec-2020<br>(15-Dec-2020)     | Ellume Limited                       | Ellume COVID-19 Home Test                                        | 95%<br>[95% CI 82% - 99%]        | 97%<br>[95% CI 93% - 99%]          | nucleocapsid                                   | w/ or wo/ symptoms       |
| 22-Dec-2020<br>(18-Dec-2020)     | Quidel Corporation                   | QuickVue SARS Antigen Test                                       | 96.6%                            | 99.3%                              | nucleocapsid                                   | 5                        |
| 16-Dec-2020<br>(26-Aug-2020)     | Abbott Diagnostics Scarborough, Inc. | BinaxNOW COVID-19 Ag Card                                        | 84.6%<br>(95% CI: 76.8% - 90.6%) | 98.5%<br>(95% CI: 96.6% - 99.5%)   | nucleocapsid                                   | 7                        |
| 16-Dec-2020<br>(16-Dec-2020)     | Abbott Diagnostics Scarborough, Inc. | BinaxNOW COVID-19 Ag Card Home Test                              | 91.7%<br>(95% CI: 73.0% - 98.9%) | 100.0%<br>(95% CI: 87.7% - 100.0%) | nucleocapsid                                   | 7                        |
| 07-Dec-2020<br>07-Dec-2020       | Luminostics, Inc.                    | Clip COVID Rapid Antigen Test                                    | 96.9%<br>(95% CI: 83.8% - 99.9%) | 100%<br>(95% CI: 97.3% - 100%)     | nucleocapsid                                   | 7                        |
| 23-Oct-2020<br>(23-Oct-2020)     | Celltrion USA, Inc.                  | Sampinute COVID-19 Antigen MIA                                   | 99.4 %                           | 100%                               | receptor binding domains (RBDs) spike proteins | 5                        |
| 13-Oct-2020<br>(08-Oct-2020)     | Access Bio, Inc.                     | CareStart COVID-19 Antigen test                                  | 88.4 %                           | 100%                               | nucleocapsid                                   | 5                        |
| 02-Oct-2020<br>(02-Oct-2020)     | Quidel Corporation                   | Sofia 2 Flu + SARS Antigen FIA                                   | 95.2 %                           | 100%                               | nucleocapsid                                   | 5                        |
| 18-Aug-2020<br>(18-Aug-2020)     | LumiraDx UK Ltd.                     | LumiraDx SARS-CoV-2 Ag Test                                      | 97.6 % (91.6 % - 99.3 %)         | 96.6 % (92.7 % - 98.4 %)           | nucleocapsid                                   | 12                       |
| 17Jul2020)<br>(08May2020)        | Quidel Corporation                   | Sofia SARS Antigen FIA                                           | 96.7 % (96.7% - 99.4 %)          | 100 %<br>(97.9 %-100.0 %)          | nucleocapsid                                   | -                        |

2207  
 2208  
 2209

**24 References**

1. Kashyap S, Gombar S, Yadlowsky S, Callahan A, Fries J, Pinsky BA, Shah NH. Measure what matters: Counts of hospitalized patients are a better metric for health system capacity planning for a reopening. *Journal of the American Medical Informatics Association*. 2020 Jul 1;27(7):1026–1131.
2. Price-Haywood EG, Burton J, Fort D, Seoane L. Hospitalization and Mortality among Black Patients and White Patients with Covid-19. *N Engl J Med*. Massachusetts Medical Society; 2020 May 27;382(26):2534–2543.
3. Xu P, Sun G-D, Li Z-Z. Clinical characteristics of two human-to-human transmitted coronaviruses: Corona Virus Disease 2019 vs. Middle East Respiratory Syndrome Coronavirus. *Eur Rev Med Pharmacol Sci*. 2020;24(10):5797–5809. PMID: 32495918
4. Nguyen NT, Chinn J, Nahmias J, Yuen S, Kirby KA, Hohmann S, Amin A. Outcomes and Mortality Among Adults Hospitalized With COVID-19 at US Medical Centers. *JAMA Netw Open*. 2021 Mar 5;4(3):e210417.
5. Bilaloglu S, Aphinyanaphongs Y, Jones S, Iturrate E, Hochman J, Berger JS. Thrombosis in Hospitalized Patients With COVID-19 in a New York City Health System. *JAMA*. 2020 Aug 25;324(8):799.
6. Lewnard JA, Liu VX, Jackson ML, Schmidt MA, Jewell BL, Flores JP, Jentz C, Northrup GR, Mahmud A, Reingold AL, Petersen M, Jewell NP, Young S, Bellows J. Incidence, clinical outcomes, and transmission dynamics of severe coronavirus disease 2019 in California and Washington: prospective cohort study. *BMJ [Internet]*. British Medical Journal Publishing Group; 2020 May 22 [cited 2020 Sep 17];369. Available from: <https://www.bmj.com/content/369/bmj.m1923> PMID: 32444358
7. CDC. Coronavirus Disease 2019 (COVID-19) [Internet]. Centers for Disease Control and Prevention. 2020 [cited 2020 Sep 17]. Available from: <https://www.cdc.gov/coronavirus/2019-ncov/hcp/clinical-guidance-management-patients.html>
8. Goldman JD, Lye DCB, Hui DS, Marks KM, Bruno R, Montejano R, Spinner CD, Galli M, Ahn M-Y, Nahass RG, Chen Y-S, SenGupta D, Hyland RH, Osinusi AO, Cao H, Blair C, Wei X, Gaggar A, Brainard DM, Towner WJ, Muñoz J, Mullane KM, Marty FM, Tashima KT, Diaz G, Subramanian A. Remdesivir for 5 or 10 Days in Patients with Severe Covid-19. *New England Journal of Medicine*. Massachusetts Medical Society; 2020 May 27;0(0):null.
9. RECOVERY Collaborative Group, Horby P, Lim WS, Emberson JR, Mafham M, Bell JL, Linsell L, Staplin N, Brightling C, Ustianowski A, Elmahi E, Prudon B, Green C, Felton T, Chadwick D, Rege K, Fegan C, Chappell LC, Faust SN, Jaki T, Jeffery K, Montgomery A, Rowan K, Juszczak E, Baillie JK, Haynes R, Landray MJ. Dexamethasone in Hospitalized Patients with Covid-19 - Preliminary Report. *N Engl J Med*. 2020 Jul 17; PMID: PMC7383595
10. Pan A, Liu L, Wang C, Guo H, Hao X, Wang Q, Huang J, He N, Yu H, Lin X, Wei S, Wu T. Association of Public Health Interventions With the Epidemiology of the COVID-19 Outbreak in Wuhan, China. *JAMA*. 2020 May 19;323(19):1915–1923. PMID: PMC7149375
11. Uhal BD, Li X, Piasecki CC, Molina-Molina M. Angiotensin signalling in pulmonary fibrosis. *Int J Biochem Cell Biol*. 2012 Mar;44(3):465–468. PMID: PMC3288339
12. Wösten-van Asperen RM, Bos AP, Bem RA, Dierdorp BS, Dekker T, van Goor H, Kamilic J, van der Loos CM, van den Berg E, Bruijn M, van Woensel JB, Lutter R. Imbalance between pulmonary angiotensin-converting enzyme and angiotensin-converting enzyme 2 activity in acute respiratory distress syndrome. *Pediatr Crit Care Med*. 2013 Nov;14(9):e438-441. PMID: 24226567
13. Wösten-van Asperen RM, Lutter R, Specht PA, Moll GN, van Woensel JB, van der Loos CM, van Goor H, Kamilic J, Florquin S, Bos AP. Acute respiratory distress syndrome leads to

- 2258 reduced ratio of ACE/ACE2 activities and is prevented by angiotensin-(1-7) or an angiotensin  
2259 II receptor antagonist. *J Pathol.* 2011 Dec;225(4):618–627. PMID: 22009550
- 2260 14. Imai Y, Kuba K, Rao S, Huan Y, Guo F, Guan B, Yang P, Sarao R, Wada T, Leong-Poi H,  
2261 Crackower MA, Fukamizu A, Hui C-C, Hein L, Uhlig S, Slutsky AS, Jiang C, Penninger JM.  
2262 Angiotensin-converting enzyme 2 protects from severe acute lung failure. *Nature.* 2005 Jul  
2263 7;436(7047):112–116. PMID: PMC7094998
- 2264 15. Gu H, Xie Z, Li T, Zhang S, Lai C, Zhu P, Wang K, Han L, Duan Y, Zhao Z, Yang X, Xing L,  
2265 Zhang P, Wang Z, Li R, Yu JJ, Wang X, Yang P. Angiotensin-converting enzyme 2 inhibits  
2266 lung injury induced by respiratory syncytial virus. *Sci Rep.* 2016 Jan 27;6:19840. PMID:  
2267 PMC4728398
- 2268 16. Zou Z, Yan Y, Shu Y, Gao R, Sun Y, Li X, Ju X, Liang Z, Liu Q, Zhao Y, Guo F, Bai T, Han Z,  
2269 Zhu J, Zhou H, Huang F, Li C, Lu H, Li N, Li D, Jin N, Penninger JM, Jiang C. Angiotensin-  
2270 converting enzyme 2 protects from lethal avian influenza A H5N1 infections. *Nat Commun.*  
2271 2014 May 6;5:3594. PMID: PMC7091848
- 2272 17. Liu M, Wang T, Zhou Y, Zhao Y, Zhang Y, Li J. Potential Role of ACE2 in Coronavirus  
2273 Disease 2019 (COVID-19) Prevention and Management. *J Transl Int Med.* 2020 Mar;8(1):9–  
2274 19. PMID: PMC7227161
- 2275 18. Wenz M, Hoffmann B, Bohlender J, Kaczmarczyk G. Angiotensin II formation and endothelin  
2276 clearance in ARDS patients in supine and prone positions. *Intensive Care Med.* 2000  
2277 Mar;26(3):292–298. PMID: 10823385
- 2278 19. Doerschug KC, Delsing AS, Schmidt GA, Ashare A. Renin-angiotensin system activation  
2279 correlates with microvascular dysfunction in a prospective cohort study of clinical sepsis. *Crit*  
2280 *Care.* 2010;14(1):R24. PMID: PMC2875539
- 2281 20. Wenz M, Steinau R, Gerlach H, Lange M, Kaczmarczyk G. Inhaled Nitric Oxide Does Not  
2282 Change Transpulmonary Angiotensin II Formation in Patients With Acute Respiratory Distress  
2283 Syndrome. *Chest.* 1997 Aug;112(2):478–483.
- 2284 21. Shen L, Mo H, Cai L, Kong T, Zheng W, Ye J, Qi J, Xiao Z. Losartan prevents sepsis-induced  
2285 acute lung injury and decreases activation of nuclear factor kappaB and mitogen-activated  
2286 protein kinases. *Shock.* 2009 May;31(5):500–506. PMID: 18827741
- 2287 22. Marshall RP, Webb S, Bellingan GJ, Montgomery HE, Chaudhari B, McAnulty RJ, Humphries  
2288 SE, Hill MR, Laurent GJ. Angiotensin converting enzyme insertion/deletion polymorphism is  
2289 associated with susceptibility and outcome in acute respiratory distress syndrome. *Am J*  
2290 *Respir Crit Care Med.* 2002 Sep 1;166(5):646–650. PMID: 12204859
- 2291 23. Adamzik M, Frey U, Sixt S, Knemeyer L, Beiderlinden M, Peters J, Siffert W. ACE I/D but not  
2292 AGT (-6)A/G polymorphism is a risk factor for mortality in ARDS. *European Respiratory*  
2293 *Journal.* 2007 Mar 1;29(3):482–488.
- 2294 24. Jerng J-S, Yu C-J, Wang H-C, Chen K-Y, Cheng S-L, Yang P-C. Polymorphism of the  
2295 angiotensin-converting enzyme gene affects the outcome of acute respiratory distress  
2296 syndrome. *Crit Care Med.* 2006 Apr;34(4):1001–1006. PMID: 16484896
- 2297 25. Khan A, Benthin C, Zeno B, Albertson TE, Boyd J, Christie JD, Hall R, Poirier G, Ronco JJ,  
2298 Tidswell M, HARDS K, Powley WM, Wright TJ, Siederer SK, Fairman DA, Lipson DA, Bayliffe  
2299 AI, Lazaar AL. A pilot clinical trial of recombinant human angiotensin-converting enzyme 2 in  
2300 acute respiratory distress syndrome. *Crit Care.* 2017 07;21(1):234. PMID: PMC5588692
- 2301 26. Shi S, Qin M, Shen B, Cai Y, Liu T, Yang F, Gong W, Liu X, Liang J, Zhao Q, Huang H, Yang  
2302 B, Huang C. Association of Cardiac Injury With Mortality in Hospitalized Patients With COVID-  
2303 19 in Wuhan, China. *JAMA Cardiology.* 2020 Jul 1;5(7):802.
- 2304 27. Guo T, Fan Y, Chen M, Wu X, Zhang L, He T, Wang H, Wan J, Wang X, Lu Z. Cardiovascular  
2305 Implications of Fatal Outcomes of Patients With Coronavirus Disease 2019 (COVID-19). *JAMA*  
2306 *Cardiology.* 2020 Jul 1;5(7):811.

- 2307 28. Kochi AN, Tagliari AP, Forleo GB, Fassini GM, Tondo C. Cardiac and arrhythmic  
2308 complications in patients with COVID-19. *J Cardiovasc Electrophysiol.* 2020;31(5):1003–1008.  
2309 PMID: PMC7262150
- 2310 29. Verdecchia P, Cavallini C, Spanevello A, Angeli F. The pivotal link between ACE2 deficiency  
2311 and SARS-CoV-2 infection. *European Journal of Internal Medicine.* 2020 Jun;76:14–20.
- 2312 30. Mancia G, Rea F, Ludergnani M, Apolone G, Corrao G. Renin–Angiotensin–Aldosterone  
2313 System Blockers and the Risk of Covid-19. *N Engl J Med.* 2020 Jun 18;382(25):2431–2440.
- 2314 31. Reynolds HR, Adhikari S, Pulgarin C, Troxel AB, Itrrate E, Johnson SB, Hausvater A,  
2315 Newman JD, Berger JS, Bangalore S, Katz SD, Fishman GI, Kunichoff D, Chen Y, Ogedegbe  
2316 G, Hochman JS. Renin–Angiotensin–Aldosterone System Inhibitors and Risk of Covid-19. *N*  
2317 *Engl J Med.* 2020 Jun 18;382(25):2441–2448.
- 2318 32. Lopes RD, Macedo AVS, de Barros E Silva PGM, Moll-Bernardes RJ, Feldman A, D’Andréa  
2319 Saba Arruda G, de Souza AS, de Albuquerque DC, Mazza L, Santos MF, Salvador NZ,  
2320 Gibson CM, Granger CB, Alexander JH, de Souza OF, BRACE CORONA investigators.  
2321 Continuing versus suspending angiotensin-converting enzyme inhibitors and angiotensin  
2322 receptor blockers: Impact on adverse outcomes in hospitalized patients with severe acute  
2323 respiratory syndrome coronavirus 2 (SARS-CoV-2)--The BRACE CORONA Trial. *Am Heart J.*  
2324 2020;226:49–59. PMID: PMC7219415
- 2325 33. Lopes RD, Macedo AVS, de Barros E Silva PGM, Moll-Bernardes RJ, Dos Santos TM, Mazza  
2326 L, Feldman A, D’Andréa Saba Arruda G, de Albuquerque DC, Camiletti AS, de Sousa AS, de  
2327 Paula TC, Giusti KGD, Domiciano RAM, Noya-Rabelo MM, Hamilton AM, Loures VA, Dionísio  
2328 RM, Furquim TAB, De Luca FA, Dos Santos Sousa ÍB, Bandeira BS, Zukowski CN, de Oliveira  
2329 RGG, Ribeiro NB, de Moraes JL, Petriz JLF, Pimentel AM, Miranda JS, de Jesus Abufaiad BE,  
2330 Gibson CM, Granger CB, Alexander JH, de Souza OF, BRACE CORONA Investigators. Effect  
2331 of Discontinuing vs Continuing Angiotensin-Converting Enzyme Inhibitors and Angiotensin II  
2332 Receptor Blockers on Days Alive and Out of the Hospital in Patients Admitted With COVID-19:  
2333 A Randomized Clinical Trial. *JAMA.* 2021 Jan 19;325(3):254–264. PMID: PMC7816106
- 2334 34. Continuation versus discontinuation of renin–angiotensin system inhibitors in patients admitted  
2335 to hospital with COVID-19: a prospective, randomised, open-label trial - *The Lancet*  
2336 *Respiratory Medicine* [Internet]. [cited 2021 Jul 12]. Available from:  
2337 [https://www.thelancet.com/journals/lanres/article/PIIS2213-2600\(20\)30558-0/fulltext](https://www.thelancet.com/journals/lanres/article/PIIS2213-2600(20)30558-0/fulltext)
- 2338 35. Schoenfeld DA, Bernard GR, ARDS Network. Statistical evaluation of ventilator-free days as  
2339 an efficacy measure in clinical trials of treatments for acute respiratory distress syndrome. *Crit*  
2340 *Care Med.* 2002 Aug;30(8):1772–1777. PMID: 12163791
- 2341 36. National Heart, Lung, and Blood Institute Acute Respiratory Distress Syndrome (ARDS)  
2342 Clinical Trials Network, Wiedemann HP, Wheeler AP, Bernard GR, Thompson BT, Hayden D,  
2343 deBoisblanc B, Connors AF, Hite RD, Harabin AL. Comparison of two fluid-management  
2344 strategies in acute lung injury. *N Engl J Med.* 2006 Jun 15;354(24):2564–2575. PMID:  
2345 16714767
- 2346 37. Laterre P-F, Berry SM, Blemings A, Carlsen JE, François B, Graves T, Jacobsen K, Lewis RJ,  
2347 Opal SM, Perner A, Pickkers P, Russell JA, Windeløv NA, Yealy DM, Asfar P, Bestle MH,  
2348 Muller G, Bruel C, Brulé N, Decruyenaere J, Dive A-M, Dugernier T, Krell K, Lefrant J-Y,  
2349 Megarbane B, Mercier E, Mira J-P, Quenot J-P, Rasmussen BS, Thorsen-Meyer H-C, Vander  
2350 Laenen M, Vang ML, Vignon P, Vinatier I, Wichmann S, Wittebole X, Kjølbye AL, Angus DC,  
2351 SEPSIS-ACT Investigators. Effect of Selepressin vs Placebo on Ventilator- and Vasopressor-  
2352 Free Days in Patients With Septic Shock: The SEPSIS-ACT Randomized Clinical Trial. *JAMA.*  
2353 2019 Oct 2; PMID: PMC6802260
- 2354 38. Self WH, Semler MW, Wanderer JP, Wang L, Byrne DW, Collins SP, Slovis CM, Lindsell CJ,  
2355 Ehrenfeld JM, Siew ED, Shaw AD, Bernard GR, Rice TW, SALT-ED Investigators. Balanced

- 2356 Crystalloids versus Saline in Noncritically Ill Adults. *N Engl J Med*. 2018 01;378(9):819–828.  
2357 PMID: PMC5846618
- 2358 39. Self WH, Semler MW, Leithner LM, Casey JD, Angus DC, Brower RG, Chang SY, Collins SP,  
2359 Eppensteiner JC, Filbin MR, Files DC, Gibbs KW, Ginde AA, Gong MN, Harrell FE, Hayden  
2360 DL, Hough CL, Johnson NJ, Khan A, Lindsell CJ, Matthay MA, Moss M, Park PK, Rice TW,  
2361 Robinson BRH, Schoenfeld DA, Shapiro NI, Steingrub JS, Ulysse CA, Weissman A, Yealy  
2362 DM, Thompson BT, Brown SM, National Heart, Lung, and Blood Institute PETAL Clinical Trials  
2363 Network, Steingrub J, Smithline H, Tiru B, Tidswell M, Kozikowski L, Thornton-Thompson S,  
2364 De Souza L, Hou P, Baron R, Massaro A, Aisiku I, Fredenburgh L, Seethala R, Johnsky L,  
2365 Riker R, Seder D, May T, Baumann M, Eldridge A, Lord C, Shapiro N, Talmor D, O'Mara T,  
2366 Kirk C, Harrison K, Kurt L, Schermerhorn M, Banner-Goodspeed V, Boyle K, Dubosh N, Filbin  
2367 M, Hibbert K, Parry B, Lavin-Parsons K, Pulido N, Lilley B, Lodenstein C, Margolin J, Brait K,  
2368 Jones A, Galbraith J, Peacock R, Nandi U, Wachs T, Matthay M, Liu K, Kangelaris K, Wang R,  
2369 Calfee C, Yee K, Hendey G, Chang S, Lim G, Qadir N, Tam A, Beutler R, Levitt J, Wilson J,  
2370 Rogers A, Vojnik R, Roque J, Albertson T, Chenoweth J, Adams J, Pearson S, Juarez M,  
2371 Almasri E, Fayed M, Hughes A, Hillard S, Huebinger R, Wang H, Vidales E, Patel B, Ginde A,  
2372 Moss M, Baduashvili A, McKeenan J, Finck L, Higgins C, Howell M, Douglas I, Haukoos J,  
2373 Hiller T, Lyle C, Cupelo A, Caruso E, Camacho C, Gravitz S, Finigan J, Griesmer C, Park P,  
2374 Hyzy R, Nelson K, McDonough K, Olbrich N, Williams M, Kapoor R, Nash J, Willig M, Ford H,  
2375 Gardner-Gray J, Ramesh M, Moses M, Ng Gong M, Aboodi M, Asghar A, Amosu O, Torres M,  
2376 Kaur S, Chen J-T, Hope A, Lopez B, Rosales K, Young You J, Mosier J, Hypes C, Natt B,  
2377 Borg B, Salvaggio Campbell E, Hite RD, Hudock K, Cresie A, Alhasan F, Gomez-Arroyo J,  
2378 Duggal A, Mehkri O, Hastings A, Sahoo D, Abi Fadel F, Gole S, Shaner V, Wimer A, Meli Y,  
2379 King A, Terndrup T, Exline M, Pannu S, Robart E, Karow S, Hough C, Robinson B, Johnson  
2380 N, Henning D, Campo M, Gundel S, Seghal S, Katsandres S, Dean S, Khan A, Krol O,  
2381 Jouzestani M, Huynh P, Weissman A, Yealy D, Scholl D, Adams P, McVerry B, Huang D,  
2382 Angus D, Schooler J, Moore S, Files C, Miller C, Gibbs K, LaRose M, Flores L, Koehler L,  
2383 Morse C, Sanders J, Langford C, Nanney K, MdalaGausi M, Yeboah P, Morris P, Sturgill J,  
2384 Seif S, Cassity E, Dhar S, de Wit M, Mason J, Goodwin A, Hall G, Grady A, Chamberlain A,  
2385 Brown S, Bledsoe J, Leithner L, Peltan I, Starr N, Fergus M, Aston V, Montgomery Q, Smith R,  
2386 Merrill M, Brown K, Armbruster B, Harris E, Middleton E, Paine R, Johnson S, Barrios M,  
2387 Eppensteiner J, Limkakeng A, McGowan L, Porter T, Bouffler A, Leahy JC, deBoisblanc B,  
2388 Lammi M, Happel K, Lauto P, Self W, Casey J, Semler M, Collins S, Harrell F, Lindsell C, Rice  
2389 T, Stubblefield W, Gray C, Johnson J, Roth M, Hays M, Torr D, Zakaria A, Schoenfeld D,  
2390 Thompson T, Hayden D, Ringwood N, Oldmixon C, Ulysse C, Morse R, Muzikansky A,  
2391 Fitzgerald L, Whitaker S, Lagakos A, Brower R, Reineck L, Aggarwal N, Bienstock K, Freemer  
2392 M, Maclawiw M, Weinmann G, Morrison L, Gillespie M, Kryscio R, Brodie D, Zareba W,  
2393 Rompalo A, Boeckh M, Parsons P, Christie J, Hall J, Horton N, Zoloth L, Dickert N, Diercks D.  
2394 Effect of Hydroxychloroquine on Clinical Status at 14 Days in Hospitalized Patients With  
2395 COVID-19: A Randomized Clinical Trial. *JAMA*. 2020 Dec 1;324(21):2165–2176. PMID:  
2396 PMC7653542
- 2397 40. Self WH, Stewart TG, Wheeler AP, Atrouni WE, Bistran-Hall AJ, Casey JD, Cataldo VD,  
2398 Chappell JD, Cohn CS, Collins JB, Denison MR, de Wit M, Dixon SL, Duggal A, Edwards TL,  
2399 Fontaine MJ, Ginde AA, Harkins MS, Harrington T, Harris ES, Hoda D, Ipe TS, Jaiswal SJ,  
2400 Johnson NJ, Jones AE, Laguio-Vila M, Lindsell CJ, Mallada J, Mammen MJ, Metcalf RA,  
2401 Middleton EA, Mucha S, O'Neal HR, Pannu SR, Pulley JM, Qiao X, Raval JS, Rhoads JP,  
2402 Schragger H, Shanholtz C, Shapiro NI, Schrantz SJ, Thomsen I, Vermillion KK, Bernard GR,  
2403 Rice TW. Passive Immunity Trial for Our Nation (PassITON): study protocol for a randomized



- 2404 placebo-control clinical trial evaluating COVID-19 convalescent plasma in hospitalized adults.  
2405 Res Sq. 2021 Mar 2; PMID: PMC7941637
- 2406 41. Beigel JH, Tomashek KM, Dodd LE, Mehta AK, Zingman BS, Kalil AC, Hohmann E, Chu HY,  
2407 Luetkemeyer A, Kline S, Lopez de Castilla D, Finberg RW, Dierberg K, Tapson V, Hsieh L,  
2408 Patterson TF, Paredes R, Sweeney DA, Short WR, Touloumi G, Lye DC, Ohmagari N, Oh M-  
2409 D, Ruiz-Palacios GM, Benfield T, Fätkenheuer G, Kortepeter MG, Atmar RL, Creech CB,  
2410 Lundgren J, Babiker AG, Pett S, Neaton JD, Burgess TH, Bonnett T, Green M, Makowski M,  
2411 Osinusi A, Nayak S, Lane HC, ACTT-1 Study Group Members. Remdesivir for the Treatment  
2412 of Covid-19 - Final Report. *N Engl J Med*. 2020 Nov 5;383(19):1813–1826. PMID:  
2413 PMC7262788
- 2414 42. Harrell, Frank. rmsb Package Examples [Internet]. [cited 2020 Nov 6]. Available from:  
2415 <https://hbiostat.org/R/rmsb/blrm.html>
- 2416 43. Harrell, Frank. General COVID-19 Therapeutics Trial Design [Internet]. [cited 2020 Nov 6].  
2417 Available from: <https://hbiostat.org/proj/covid19/statdesign.html>
- 2418 44. Simpson DG, Carroll RJ, Zhou H, Guth DJ. Interval Censoring and Marginal Analysis in  
2419 Ordinal Regression. *Journal of Agricultural, Biological, and Environmental Statistics*. 1996  
2420 Sep;1(3):354.
- 2421 45. Food and Drug Administration. E9(R1) Statistical Principles for Clinical Trials: Addendum:  
2422 Estimands and Sensitivity Analysis in Clinical Trials [Internet]. 2017. Available from:  
2423 <https://www.fda.gov/media/108698/download>
- 2424 46. Zhenming S, McCullagh P. Laplace approximation of high dimensional integrals. *Journal of the*  
2425 *Royal Statistical Society*. 1995;57(4):749–760.
- 2426 47. Doob J. The limiting distributions of certain statistics. *The Annals of Mathematical Statistics*.  
2427 1935 Sep 1;6(3):160–169.
- 2428 48. Liu Q, Shepherd BE, Li C, Harrell FE. Modeling continuous response variables using ordinal  
2429 regression. *Stat Med*. 2017 Nov 30;36(27):4316–4335. PMID: PMC5675816
- 2430 49. Harrell, Frank. Violation of Proportional Odds is Not Fatal | Statistical Thinking [Internet]. [cited  
2431 2020 Nov 6]. Available from: <https://www.fharrell.com/post/po/>
- 2432 50. World Health Organization. WHO R&D Blueprint - Novel Coronavirus, COVID-19 Therapeutic  
2433 Trial Synopsis [Internet]. 2020. Available from: [https://www.who.int/blueprint/priority-](https://www.who.int/blueprint/priority-diseases/key-action/COVID-19_Treatment_Trial_Design_Master_Protocol_synopsis_Final_18022020.pdf)  
2434 [diseases/key-action/COVID-](https://www.who.int/blueprint/priority-diseases/key-action/COVID-19_Treatment_Trial_Design_Master_Protocol_synopsis_Final_18022020.pdf)  
2435 [19\\_Treatment\\_Trial\\_Design\\_Master\\_Protocol\\_synopsis\\_Final\\_18022020.pdf](https://www.who.int/blueprint/priority-diseases/key-action/COVID-19_Treatment_Trial_Design_Master_Protocol_synopsis_Final_18022020.pdf)
- 2436 51. Iusuf D, Henning RH, van Gilst WH, Roks AJM. Angiotensin-(1-7): pharmacological properties  
2437 and pharmacotherapeutic perspectives. *Eur J Pharmacol*. 2008 May 13;585(2–3):303–312.  
2438 PMID: 18417117
- 2439 52. Kuba K, Imai Y, Rao S, Gao H, Guo F, Guan B, Huan Y, Yang P, Zhang Y, Deng W, Bao L,  
2440 Zhang B, Liu G, Wang Z, Chappell M, Liu Y, Zheng D, Leibbrandt A, Wada T, Slutsky AS, Liu  
2441 D, Qin C, Jiang C, Penninger JM. A crucial role of angiotensin converting enzyme 2 (ACE2) in  
2442 SARS coronavirus-induced lung injury. *Nat Med*. 2005 Aug;11(8):875–879. PMID:  
2443 PMC7095783
- 2444 53. Verdecchia P, Cavallini C, Spanevello A, Angeli F. The pivotal link between ACE2 deficiency  
2445 and SARS-CoV-2 infection. *Eur J Intern Med*. 2020 Jun;76:14–20. PMID: PMC7167588
- 2446 54. Vaduganathan M, Vardeny O, Michel T, McMurray JJV, Pfeffer MA, Solomon SD. Renin–  
2447 Angiotensin–Aldosterone System Inhibitors in Patients with Covid-19. *New England Journal of*  
2448 *Medicine*. 2020 Apr 23;382(17):1653–1659.
- 2449 55. Choi HS, Kim IJ, Kim CS, Ma SK, Scholey JW, Kim SW, Bae EH. Angiotensin-[1–7] attenuates  
2450 kidney injury in experimental Alport syndrome. *Scientific Reports [Internet]*. 2020 Dec [cited  
2451 2020 Oct 3];10(1). Available from: <http://www.nature.com/articles/s41598-020-61250-5>

## ACTIV-4 Host Tissue

Protocol Version: 1.8 dated 2021.12.17.

- 2452 56. Haschke M, Schuster M, Poglitsch M, Loibner H, Salzberg M, Bruggisser M, Penninger J,  
2453 Krähenbühl S. Pharmacokinetics and pharmacodynamics of recombinant human angiotensin-  
2454 converting enzyme 2 in healthy human subjects. *Clin Pharmacokinet*. 2013 Sep;52(9):783–  
2455 792. PMID: 23681967
- 2456 57. Zoufaly A, Poglitsch M, Aberle JH, Hoepfer W, Seitz T, Traugott M, Grieb A, Pawelka E, Laferl  
2457 H, Wenisch C, Neuhold S, Haider D, Stiasny K, Bergthaler A, Puchhammer-Stoeckl E,  
2458 Mirazimi A, Montserrat N, Zhang H, Slutsky AS, Penninger JM. Human recombinant soluble  
2459 ACE2 in severe COVID-19. *The Lancet Respiratory Medicine*. 2020 Nov;8(11):1154–1158.
- 2460 58. Jia HP, Look DC, Tan P, Shi L, Hickey M, Gakhar L, Chappell MC, Wohlford-Lenane C,  
2461 McCray PB. Ectodomain shedding of angiotensin converting enzyme 2 in human airway  
2462 epithelia. *Am J Physiol Lung Cell Mol Physiol*. 2009 Jul;297(1):L84-96. PMID: PMC2711803
- 2463 59. Alhenc-Gelas F, Druelle TB. Blockade of SARS-CoV-2 infection by recombinant soluble  
2464 ACE2. *Kidney Int*. 2020;97(6):1091–1093. PMID: PMC7194930
- 2465 60. Monteil V, Kwon H, Prado P, Hagelkrüys A, Wimmer RA, Stahl M, Leopoldi A, Garreta E,  
2466 Hurtado Del Pozo C, Prosper F, Romero JP, Wirnsberger G, Zhang H, Slutsky AS, Conder R,  
2467 Montserrat N, Mirazimi A, Penninger JM. Inhibition of SARS-CoV-2 Infections in Engineered  
2468 Human Tissues Using Clinical-Grade Soluble Human ACE2. *Cell*. 2020 14;181(4):905-913.e7.  
2469 PMID: PMC7181998

2470

2471
