# Supplementary material
Source: PubMed Central journal article supplement (PMC10091180)
Supplement: jama-e233546-s003.pdf [file jama-e233546-s003.pdf]

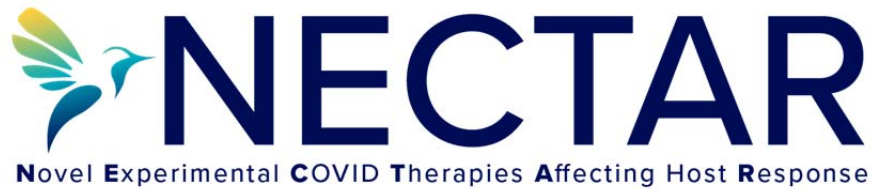

# Statistical Analysis Plan

**CONNECTS Master Protocol for Clinical Trials targeting macro-, micro-immuno-thrombosis, vascular hyperinflammation, and hypercoagulability and renin-angiotensin-aldosterone system (RAAS) in hospitalized patients with COVID-19 (ACTIV 4 Host Tissue)**

**Version 1.2  
July 28, 2022**

**Study Chair:**

Sean P. Collins, MD, MSc.  
Vanderbilt University Medical Center  
1313 21<sup>st</sup> Ave S #801  
Nashville, TN 37232  
Phone: 615-936-0087  
Email: [sean.collins@vumc.org](mailto:sean.collins@vumc.org)

**Principal Investigator,  
Clinical Coordinating Center  
(CCC):**

Wesley H. Self, MD, MPH  
Vanderbilt University Medical Center  
1313 21<sup>st</sup> Ave S  
Nashville, TN 37232  
Phone: 615-936-0253  
Email: [wesley.self@vumc.org](mailto:wesley.self@vumc.org)

**Principal Investigator,  
Data Coordinating Center  
(DCC)**

Matthew S. Shotwell, PhD  
Vanderbilt University School of Medicine  
2525 West End Avenue  
Suite 11000  
Nashville, TN 37203  
Phone: 615-875-3397  
Email: [matt.shotwell@vumc.org](mailto:matt.shotwell@vumc.org)

1  
2  
3  
4  
5  
6  
7  
8  
9  
10  
11

12  
13

14  
15

16 **Revision History:**

| <b>Ver.</b> | <b>Date</b> | <b>Authors</b> | <b>Summary of Revisions:</b>                                                                                                                                                                                                                                                                                                                                                                    |
|-------------|-------------|----------------|-------------------------------------------------------------------------------------------------------------------------------------------------------------------------------------------------------------------------------------------------------------------------------------------------------------------------------------------------------------------------------------------------|
| 1.0         | 2/14/22     | M. Shotwell    | Initial version                                                                                                                                                                                                                                                                                                                                                                                 |
| 1.1         | 3/8/22      | M. Shotwell    | <ul style="list-style-type: none"><li>• Simplified interim stopping rule</li><li>• Updated simulation results and decision thresholds at interim and final analyses</li><li>• Clarified purpose of AngioNECTAR</li><li>• Additional details about sensitivity analyses</li><li>• Summarized sample size reassessment process</li><li>• Additional details of final analysis procedure</li></ul> |
| 1.2         | 7/28/22     |                | <ul style="list-style-type: none"><li>• Clarifications to address FDA comments</li><li>• Additional tipping point analysis to evaluate effect of partially observed outcomes on efficacy conclusion</li><li>• Additional supplemental appendices</li></ul>                                                                                                                                      |
|             |             |                |                                                                                                                                                                                                                                                                                                                                                                                                 |

17  
18  
19  
20  
21  
22  
23  
24  
25  
26  
27  
28  
29  
30  
31  
32  
33  
34  
35  
36  
37  
38  
39  
40  
41  
42  
43

**Signatures:**

---

**Name** **Date**

44 **ABBREVIATIONS AND ACRONYMS**

45

|          |                                                                  |
|----------|------------------------------------------------------------------|
| ACE      | Angiotensin-Converting Enzyme                                    |
| AE       | Adverse Event                                                    |
| ANG      | Angiotensin                                                      |
| API      | Application Programming Interface                                |
| ARDS     | Acute Respiratory Distress Syndrome                              |
| BD       | Becton Dickinson                                                 |
| BID      | Biospecimen Identity                                             |
| BCL      | Biorepository and Central Laboratory                             |
| BMP      | Basic Metabolic Panel                                            |
| CBC      | Complete Blood Count                                             |
| CCC      | Clinical Coordinating Center                                     |
| CDE      | Common Data Element                                              |
| CDISC    | Clinical Data Interchange Standards Consortium                   |
| CDASH    | Clinical Data Acquisition Standards Harmonization                |
| CFR      | Code of Federal Regulations                                      |
| COVID-19 | Coronavirus Disease 2019                                         |
| CRF      | Case Report Form                                                 |
| CRP      | C-Reactive Protein                                               |
| CTOM     | Clinical Trial Operation Manager                                 |
| CTCAE    | Common Terminology Criteria for Adverse Events                   |
| DAG      | Data Access Group                                                |
| DAIDS    | Division of Acquired Immunodeficiency Syndrome                   |
| DCC      | Data Coordinating Center                                         |
| DOB      | Date of Birth                                                    |
| DOR      | Delegation of Responsibilities                                   |
| DR       | Disaster Recovery                                                |
| DSMB     | Data Safety Monitoring Board                                     |
| DSMP     | Data Safety Monitoring Plan                                      |
| eConsent | Electronic Consent                                               |
| eCRF     | Electronic Case Report Forms                                     |
| EDC      | Electronic Data Capture                                          |
| EMR      | Electronic Medical Record                                        |
| FAQ      | Frequently Asked Question                                        |
| FDA      | Food and Drug Administration                                     |
| GDPR     | General Data Protection Regulation                               |
| GUID     | Globally Unique Identifier                                       |
| HT       | Host Tissue                                                      |
| hsTn     | High-sensitivity Troponins                                       |
| ICF      | Informed Consent Form                                            |
| ICH GCP  | International Conference of Harmonization Good Clinical Practice |
| ID       | Identity                                                         |
| IMV      | Invasive Mechanical Ventilation                                  |
| INR      | International Normalized Ratio                                   |
| IP       | Investigational Product                                          |
| IRB      | Institutional Review Board                                       |

|           |                                                                                               |
|-----------|-----------------------------------------------------------------------------------------------|
| IT        | Information Technology                                                                        |
| ITT       | Intent-To-Treat                                                                               |
| KSP       | Key Study Personnel                                                                           |
| LAR       | Legally Authorized Representative                                                             |
| LFT       | Liver Function Test                                                                           |
| MOP       | Manual of Procedures                                                                          |
| NAT       | Nucleic Acid Test                                                                             |
| NHLBI     | National Heart, Lung, and Blood Institute                                                     |
| NINDS     | National Institute of Neurological Disorders and Stroke                                       |
| NTproBNP  | N-terminal prohormone B-type natriuretic peptide                                              |
| N3C       | National COVID Cohort Collaborative                                                           |
| PDF       | Portable Data Format                                                                          |
| PI        | Principal Investigator                                                                        |
| PSESE     | Protocol-Specified Exempt Serious Events                                                      |
| PT        | Prothrombin Time                                                                              |
| PTT       | Partial Thromboplastin Time                                                                   |
| REDCap    | Research Electronic Data Capture                                                              |
| RTI       | Research Triangle Institute                                                                   |
| SAP       | Statistical Analysis Plan                                                                     |
| SAE       | Serious Adverse Event                                                                         |
| sIRB      | Single Institutional Review Board                                                             |
| SOC       | Standard of Care                                                                              |
| SOFA      | Sequential Organ Failure Assessment                                                           |
| UAT       | User Acceptance Testing                                                                       |
| VCC       | Vanderbilt Coordinating Center                                                                |
| VMP       | Validation Master Plan                                                                        |
| VUMC      | Vanderbilt University Medical Center                                                          |
| VUMC-IT   | Vanderbilt University Medical Center – Information Technology                                 |
| VICTR-ORI | Vanderbilt Institute for Clinical and Translational Research – Office of Research Informatics |
| WHO       | World Health Organization                                                                     |

## 48 1 INTRODUCTION

49  
50 The Statistical Analysis Plan (SAP) was developed by DCC statisticians in collaboration with  
51 study team leadership and NHLBI representatives. The SAP describes treatment arms, analysis  
52 datasets, all outcomes and planned analyses, randomization procedure and algorithm, decision  
53 thresholds and interim stopping rules, design and results of simulations to determine power and  
54 sample size and demonstrate study operating characteristics, procedures for handling missing  
55 data, and any other information that is essential to carry out all statistical analyses.  
56

### 57 1.1 AngioNECTAR SAP

58 AngioNECTAR is a mechanistic sub-study that will utilize biospecimens collected as part of  
59 ACTIV 4 Host Tissue and complement the clinical information obtained in our primary analysis.  
60 This sub-study will examine the effects of study therapies on biomarkers of the Renin-  
61 Angiotensin-Aldosterone-System. Statistical analyses associated with the AngioNECTAR sub-  
62 study will be designed and implemented by AngioNECTAR PI D. Clark Files, MD, and Co-  
63 Investigators Mark Chappell, PhD and Chris Schaich, PhD. A separate SAP for the  
64 AngioNECTAR sub-study will be finalized by the AngioNECTAR investigators prior to unblinding  
65 of the active/placebo status for sub-study participants.  
66

### 67 1.2 SAP Approval and Revision

68 The SAP will be reviewed and approved by the ACTIV 4 Host Tissue stakeholders listed below  
69 prior to the first interim analysis for any arm:  
70

- 71 • ACTIV 4 Host Tissue Study Chair: Sean Collins, MD
  - 72 • ACTIV 4 Host Tissue DCC PI: Matthew S. Shotwell, PhD
  - 73 • NHLBI Statistician: James Troendle, PhD
- 74

75 Amendments to the SAP must also be approved by the stakeholders listed above. Amendments  
76 must be version controlled and numbered. All revisions will be summarized briefly, including the  
77 changes made, new version number, and the author of the changes.  
78

## 79 2 STUDY DESIGN

### 80 2.1 Summary

81 The ACTIV 4 Host Tissue master protocol describes a common approach to studies of blinded,  
82 placebo-controlled therapeutic approaches of host-tissue targeted therapies in hospitalized  
83 COVID-19 patients. The Master Protocol is designed to be flexible in the number of study arms,  
84 to have a common placebo group, and to allow for stopping and adding of new therapies, while  
85 using a common approach to design, analysis, and implementation.  
86  
87

### 88 2.2 Study Arms and Pooled Placebo

89 The ACTIV 4 Host Tissue platform consists of multiple study arms that represent distinct drug  
90 therapies. During the randomization process, each participant is assigned a study arm and  
91 either the active drug or a matching placebo. The statistical analyses described herein will be  
92 implemented separately for each study arm. However, placebo participants will be pooled  
93 across arms. For each study arm, the placebo comparator group will consist of all placebo  
94 participants that were *eligible* for that study arm at the time of randomization. A participant is  
95 considered eligible for a study arm if assignment to that arm was a possible outcome of  
96 randomization. Participants that decline to participate in any one or more study arms prior to

97 randomization will be treated as ineligible for those arms. The randomization process is  
98 designed to ensure balance in each active drug group versus the corresponding placebo  
99 comparator group.

100

### 101 **2.3 Randomization**

102 Participants are randomized individually at enrollment using a central electronic system. The  
103 permuted block method, with stratification by study site and study arm eligibility is used to  
104 generate treatment assignments. An eligibility stratum is the collection of study arms for which a  
105 participant is eligible. Stratification by site ensures balance across the active and pooled  
106 placebo comparator groups at regular enrollment intervals at each site, thus mitigating the  
107 impact of site heterogeneity on assessments of treatment effect. Each block contains a multiple  
108 of  $m(m+1)$  assignments, where  $m$  is the number of study arms in the corresponding eligibility  
109 stratum. Within each block there are an equal number of allocations across study arms and, for  
110 each study arm, there are  $m$  active and 1 placebo assignments. For example, in the TXA127  
111 and TRV027 eligibility stratum, each block consists of the following allocations, or multiples  
112 thereof:

113

| <u>Study Arm</u> | <u>Placebo/Active</u> |
|------------------|-----------------------|
| TXA127           | Active                |
| TXA127           | Active                |
| TXA127           | Placebo               |
| TRV027           | Active                |
| TRV027           | Active                |
| TRV027           | Placebo               |

114

115

116 Thus, within each block, assignments are balanced across study arms, and the active  
117 assignments are balanced with the pooled placebo assignments. The block size multiple is  
118 either 1 or 2, selected uniformly at random for each block.

119

### 120 **2.4 Blinding**

121 For organizational purposes, the randomized assignment comprises two distinct pieces of  
122 information: 1) study arm, and 2) active vs. placebo assignment. The study arm is not blinded,  
123 whereas the active/placebo assignment is blinded from participants and investigators (other  
124 than unblinded personnel as required for study operations, data quality/analysis, and safety).  
125 Blinding will remain in place until all participants have completed the study, all data quality  
126 monitoring is complete, and the database is locked.

## 127 **3 OUTCOMES**

128

### 129 **3.1 Primary Outcome**

130 The primary outcome for the ACTIV 4 Host Tissue platform is oxygen free days (OFD) at day  
131 28. OFD will be calculated as the number of calendar days during the first 28 days after  
132 randomization during which the patient was alive and not receiving supplemental oxygen  
133 therapy. Participants who chronically used supplemental oxygen prior to their COVID-19 illness  
134 will be considered oxygen free when their use of supplemental oxygen does not exceed the  
135 level of oxygen support (measured in daily L/min·h by nasal cannula) used prior to COVID-19  
136 illness. Supplemental oxygen therapy includes the following: supplemental oxygen by nasal  
137 cannula, supplemental oxygen by face mask, high flow nasal cannula (HFNC), non-invasive  
138 ventilation (NIV), invasive mechanical ventilation (IMV), or extracorporeal membrane

139 oxygenation (ECMO). The day of randomization is defined as day 0. Starting with study day 1  
140 (the day after randomization) and continuing for 28 days, study personnel will document  
141 whether the participant received supplemental oxygen therapy on each day for any duration of  
142 time. Use of supplemental oxygen at home after discharge will be assessed via telephone  
143 follow-up calls to the participant or surrogates. OFD will be calculated as 28 minus the number  
144 of days between and including the first and last days of supplemental oxygen use during the first  
145 28 days after randomization. OFD will be coded as -1 for patients who died on or before study  
146 day 28. Hence, OFD may take any integer value between -1 and 28. OFD is an ordered  
147 categorical (i.e., ordinal) outcome that may be interpreted as a count of days. Additional details  
148 about calculating OFDs may be found in the SAP appendix (see Appendix: Algorithm to  
149 Compute Primary Outcome).  
150

### 151 3.2 Secondary Outcomes

152 Listed below are the ACTIV 4 Host Tissue platform secondary outcomes. The “Test Order” field  
153 indicates the order in which key secondary outcomes will be tested, using the fixed-sequence  
154 method, to control the familywise type-I error probability across the primary and key secondary  
155 outcomes.  
156

| Description                                  | Type    | Test Order | Analysis Method |
|----------------------------------------------|---------|------------|-----------------|
| Alive and oxygen free at day 14              | Binary  |            | LogR            |
| Alive and oxygen free at day 28              | Binary  |            | LogR            |
| Alive and respiratory failure-free at day 14 | Binary  |            | LogR            |
| Alive and respiratory failure-free at day 28 | Binary  | 1          | LogR            |
| Alive and free of new IMV at day 14          | Binary  |            | LogR            |
| Alive and free of new IMV at day 28          | Binary  |            | LogR            |
| Mortality in-hospital                        | Binary  |            | LogR            |
| Mortality at day 28                          | Binary  | 3          | LogR            |
| Mortality at day 60                          | Binary  |            | LogR            |
| Mortality at day 90                          | Binary  |            | LogR            |
| WHO 8-point ordinal scale at day 14          | Ordinal |            | POLR            |
| WHO 8-point ordinal scale at day 28          | Ordinal | 2          | POLR            |
| WHO 8-point ordinal scale at day 60          | Ordinal |            | POLR            |
| Hospital-free days at day 28                 | Ordinal |            | POLR            |
| Respiratory failure-free days at day 28      | Ordinal |            | POLR            |
| Ventilator-free days at day 28               | Ordinal |            | POLR            |

157 LogR – Logistic Regression; POLR – Proportional Odds Logistic Regression  
158

159 The WHO 8-point ordinal scale is defined as most severe clinical status among the following on  
160 the day of assessment:

- 161 1. Ambulatory – Not hospitalized, no limitation of activities
- 162 2. Ambulatory – Not hospitalized with limitation of activities or home oxygen therapy
- 163 3. Hospitalized Mild Disease – Hospitalized, no oxygen therapy
- 164 4. Hospitalized Mild Disease – Oxygen by mask or nasal prongs
- 165 5. Hospitalized Severe Disease – Non-invasive ventilation of high-flow oxygen
- 166 6. Hospitalized Severe Disease – IMV
- 167 7. Hospitalized Severe Disease – IMV + organ support with-vasopressors, RRT, or ECMO
- 168 8. Dead

169  
170 Alive and respiratory failure-free at day 28, the WHO 8-point ordinal scale at day 28, and  
171 Mortality at day 28 are key secondary outcomes that will be treated as a family for testing



172 purposes, even though the studies will not be adequately powered to detect anything but a very  
173 strong treatment effect on these outcomes. A supplementary analysis to assess the evidence  
174 that treatment lowers the risk of death in a way that is consistent with its effect on nonfatal  
175 outcomes will be performed. A respiratory failure-free day is defined as a day alive without the  
176 use of HFNC, NIV, IMV, or ECMO.  
177

### 178 3.3 Safety Outcomes

179 Safety outcomes include the following events, assessed daily during hospitalization or  
180 intermittently following hospital discharge. For each event, we will analyze two composite binary  
181 outcomes: 1) the occurrence of one or more such events by the end of study day 7 and 2) the  
182 occurrence of one or more such events by the end of study day 28.  
183

| Description                            | Type   | Analysis Method |
|----------------------------------------|--------|-----------------|
| Hypotension                            | Binary | LogR            |
| Allergic reaction, rash, or angioedema | Binary | LogR            |
| Incident renal replacement therapy     | Binary | LogR            |
| Other PSESE                            | Binary | LogR            |

184 LogR – Logistic Regression  
185

186 Hypotension is defined by low arterial blood pressure leading to either [1] initiation or increase in  
187 vasopressor therapy, [2] administration of a fluid bolus of 500 ml or more, or [3] modification of  
188 the dose or discontinuation of the study drug.  
189

### 190 3.4 Exploratory Outcomes

191 Exploratory outcomes will include (at least) the following:  
192

| Description                                                                                                                          | Type         | Analysis Method |
|--------------------------------------------------------------------------------------------------------------------------------------|--------------|-----------------|
| Change in troponin during hospitalization                                                                                            | Quantitative | LinR            |
| Change in NT-proBNP                                                                                                                  | Quantitative | LinR            |
| Change in RAAS mechanistic biomarkers:<br>1. AngII<br>2. Ang(1-7)<br>3. Plasma renin activity<br>4. Aldosterone<br>5. ACE<br>6. ACE2 | Quantitative | LinR            |
| Change in serum creatinine                                                                                                           | Quantitative | LinR            |
| Change in eGFR                                                                                                                       | Quantitative | LinR            |
| Acute kidney injury (KDIGO criteria)                                                                                                 | Ordinal      | POLR            |

193 LinR – Linear Regression; POLR – Proportional Odds Logistic Regression  
194

195 Exploratory outcomes may be collected at just a subset of sites.  
196

## 197 4 ANALYSIS DATASETS

198 For each study arm, the following analysis datasets will be produced using records for  
199 participants that were assigned to the active drug group and placebo participants that were  
200 *eligible* for the active drug group at the time of randomization:  
201  
202

203 Modified intention-to-treat dataset: The mITT analysis dataset will include all randomized  
204 participants grouped by study arm and active/placebo assignment at randomization, regardless  
205 of subsequent compliance or protocol violations, with the following exceptions: 1. Participants  
206 who have not received the study drug assigned at randomization will be excluded. 2.  
207 Participants who were randomized and later found to be ineligible based on assessments  
208 initiated prior to randomization will be excluded. All statistical analyses will be implemented  
209 using mITT dataset unless otherwise explicitly specified in this statistical analysis plan.  
210

211 Intention-to-treat dataset: The intention-to-treat (ITT) analysis dataset will consist of all  
212 randomized participants grouped by study arm and active/placebo assignment at randomization  
213 regardless of subsequent compliance or protocol violations.  
214

215 Safety dataset: The safety analysis dataset will consist of all participants who received at least  
216 one dose of study medication grouped by the drug(s) received.  
217

## 218 **5 EFFICACY TESTING & FAMILYWISE TYPE-I ERROR CONTROL**

219  
220 Efficacy regarding the primary outcome and each key secondary outcome will be tested using a  
221 one-sided method that ensures no more than a 2.5% chance of a type-I error. The fixed-  
222 sequence method will be used to control the familywise type-I error probability at 2.5% for the  
223 family of primary and key secondary outcomes.<sup>1</sup> Specifically, a conclusion of efficacy regarding  
224 the primary outcome will be required prior to testing the first designated key secondary  
225 outcome. Each subsequent key secondary outcome, in the designated order, will take place  
226 only if the preceding key secondary outcome demonstrates efficacy. This approach provides  
227 strong control of the familywise type-I error probability at 2.5% for the family of primary and key  
228 secondary outcomes. No other statistical hypothesis tests will be made regarding other  
229 secondary, safety, or exploratory outcomes. P-values associated with certain null hypothesis  
230 tests may be provided for descriptive purposes, or to fulfill special requests, e.g., for DSMB  
231 safety assessments.  
232

## 233 **6 ANALYSIS OF THE PRIMARY OUTCOME**

234  
235 The effect of the active drug versus placebo will be quantified using an odds ratio – the primary  
236 estimand – which quantifies the treatment effect on the odds of greater oxygen-free days at day  
237 28. Based on the behavior of similar outcomes in prior trials,<sup>2-6</sup> we anticipate the distribution of  
238 the primary outcome to be irregular, with peaks around -1 to 0 and between 22 and 28 days.  
239 Thus, we will use a flexible semi-parametric approach for the primary outcome analysis.  
240 Estimation and inferences about the odds ratio will be made using Bayesian proportional odds  
241 (PO) logistic regression methods, adjusting for the active drug vs placebo indicator variable, age  
242 group (18-30, 31-65, >65 years), sex at birth, and WHO COVID ordinal outcome score at  
243 baseline (4, 5, and 6-7).<sup>7</sup> Evidence for efficacy will be quantified using the posterior probability  
244 that the active drug versus placebo odds ratio is greater than one (i.e., treatment is associated  
245 with greater oxygen free days at day 28). This is denoted the “efficacy probability” or  
246  $P(OR > 1|Data)$ , where OR represents the odds ratio, and Data represents the mITT analysis  
247 dataset. The “inferiority/harm probability” is defined as  $P(OR \leq 1|Data)$ . The primary analysis will  
248 be implemented separately for each study arm, where the placebo comparator group will consist  
249 of placebo participants that were eligible for the corresponding study arm at randomization,  
250 regardless of the study arm assigned. The primary and supplementary estimates will be  
251 presented with 95% credible intervals.

252

## 253 **6.1 Statistical Model**

254 The PO model can be written in terms of the covariates  $X$  and an outcome variable  $Y$ , where  
255 probabilities of outcome value  $y$  or greater  $\Pr(Y \geq y|X) = \text{expit}(\alpha_y + X\beta)$  where  $\alpha_y$  is the  
256 intercept for outcome value  $y$  and  $\text{expit}$  is the logistic (inverse logit) transformation and the  
257 columns of matrix  $X$  contain coded baseline covariates and the active/placebo treatment  
258 indicator.  $\beta$  represents the log odds ratio (OR) associated with the effects of covariates and  
259 group assignment. Specifically, the group assignment odds ratio represents the relative effect of  
260 treatment versus placebo on the odds  $\Pr(Y \geq y|X)/(1 - \Pr(Y \geq y|X))$ , for any value  $y$ .

261

262 A flat prior distribution will be used for all PO model parameters. This ensures that the estimate  
263 of the primary estimand will be free of influence from an informative prior, and the Bayesian  
264 maximum *a posteriori* estimate will be identical to the maximum likelihood estimate (see  
265 Appendix: Cumulative Logit Model). The posterior distribution for the log odds ratio will be  
266 approximated using the Laplace method.<sup>8</sup> Use of a flat prior ensures the Laplace-approximated  
267 posterior distribution is identical to the asymptotic sampling distribution of the maximum  
268 likelihood estimate; in both cases a normal distribution centered at the estimate with variance-  
269 covariance equal to the negative inverse Hessian of the log likelihood function (inverse  
270 observed Fisher information; see Appendix: Laplace Approximation). All statistical inferences  
271 about the odds ratio will be made using this method. Statistical uncertainty about supplementary  
272 estimands (e.g., treatment difference in the median of the primary outcome) will be quantified  
273 using the delta method.<sup>9</sup> Given the investigational nature of the agents tested by this platform,  
274 there is insufficient information upon which to justify a more informative prior. The flat prior  
275 approach ensures that Bayesian inferences regarding the efficacy of study agents are based  
276 exclusively on the data collected in the ACTIV 4 Host Tissue platform.

277

## 278 **6.2 Loss to Follow-up, Censoring, and Intercurrent Events**

279 Participants who withdraw consent prior to data collection, or for whom there is no partial  
280 information about the primary outcome, will not be excluded from analysis. We will strive to  
281 avoid loss to follow-up by making repeated attempts to contact participants or otherwise retrieve  
282 participant records. If loss-to-follow-up cannot be avoided, and the information needed to  
283 compute the primary endpoint is partially known (i.e., censored), we will use a likelihood-based  
284 method to account for this censoring. For example, if a study participant received supplemental  
285 oxygen every day during the 10-day period after randomization, but is then lost to follow-up, the  
286 primary outcome is only partially known (i.e., OFDs  $\leq 18$  in this example). The PO model  
287 provides a convenient mechanism to account for this and other types of censoring using a  
288 likelihood-based approach.<sup>10</sup> For observations that are fully observed, the log likelihood  
289 contribution is  $l(\alpha, \beta; y, x) = \log \Pr(Y = y|X = x)$ . For observations that are left censored at  $y$   
290 (e.g.,  $\leq 18$  OFDs), the log likelihood contribution is  $l(\alpha, \beta; y, x) = \log \Pr(Y \leq y|X = x)$ . The latter  
291 is conveniently computed by substituting  $1 - \text{expit}(\alpha_y + x\beta)$ . More complex partially observed  
292 outcomes (e.g., right or interval censored) are modeled in a similar manner.

293

294 All primary analyses will be implemented using the mITT analysis dataset. The intercurrent  
295 event of death will be coded as a special value in the primary outcome (i.e., composite  
296 strategy). No other intercurrent events will affect the primary outcome assessment (i.e.,  
297 treatment policy strategy).<sup>11</sup>

298

299 Participant age, sex, and WHO COVID scale at baseline are subject to source verification  
300 monitoring. Thus, we do not anticipate missing covariate data.

301

302

### 303 **6.3 Planned Interim and Final Analyses, Early Stopping, and Type-I Error Control**

304 Two planned interim analyses will occur separately for each study arm when the number of  
305 participants with complete 28-day follow-up (or were deceased, withdrawn, or lost-to-follow-up  
306 by day 28) reaches 33% and 67% of maximum enrollment for that arm. Interim analyses will be  
307 executed by unblinded personnel only. Participant records that inform the primary outcome must  
308 undergo monitoring prior to interim (and final) analysis. At each interim analysis, a study arm  
309 may be stopped early if there is evidence for inferiority/harm. Enrollment in the trial will be  
310 stopped early if the posterior probability for inferiority/harm exceeds 0.95.

311

312 Final analysis will occur once enrollment, follow-up, and the required monitoring are completed.  
313 Should additional data be collected after enrollment is halted at an interim analysis, the final  
314 analysis will incorporate this additional data. If the trial was stopped early at an interim analysis  
315 due to evidence of inferiority/harm, a conclusion of inferiority/harm will be indicated if the  
316 posterior probability for inferiority/harm remains greater than 0.95 at the final analysis. If the trial  
317 was not stopped early at an interim analysis due to evidence of inferiority/harm, efficacy will be  
318 indicated if the posterior probability for efficacy regarding the primary outcome exceeds a  
319 threshold. For studies under this master protocol, the efficacy threshold was selected using  
320 statistical simulation to ensure a type-I error probability of 2.5% for each study arm. In all other  
321 scenarios, the trial is inconclusive.

322

### 323 **6.4 Supplementary Efficacy Estimands**

324 The PO model is attractive for the analysis of ordinal and quantitative response variables, such  
325 as the primary outcome, because they directly model the cumulative distribution function from  
326 which the mean, median, other percentiles, and cumulative probabilities of the primary outcome,  
327 stratified by treatment group, are easily derived.<sup>12</sup> In addition to the odds ratio, the effects of  
328 treatment versus placebo will be quantified using the difference in mean, difference in median,  
329 and differences in clinically relevant proportions associated with the primary outcome: mortality  
330 at day 28:  $\Pr(Y = -1|X)$ , and oxygen requirement every day until day 28:  $\Pr(Y = 0|X)$ , adjusted  
331 to the modal value for each covariate. These important and clinically meaningful supplementary  
332 estimands will be used to describe and communicate the treatment effect. The posterior  
333 distribution for each of the supplementary estimands is readily computed using standard  
334 Bayesian methods.

335

### 336 **6.5 Sensitivity and Supplementary Analyses**

337

338 Sensitivity and supplemental analyses will be implemented at the final analysis.

339

340 The *proportional odds assumption* of the PO model specifies that the effect of treatment on the  
341 odds that  $Y \geq 3$  (measured as an odds ratio versus placebo) is the same relative effect as for  $Y$   
342  $\geq 4$ . However, even when the PO assumption is strongly violated, the estimated OR remains a  
343 simple function of the Wilcoxon-Mann-Whitney U-statistic, namely the probability that a  
344 randomly chosen patient on treatment B has a higher response than a randomly chosen patient  
345 on treatment A,<sup>13</sup> the *probability index* or *concordance probability*. In addition, under the null  
346 hypothesis, the PO assumption is always satisfied. Thus, statistical testing based on the odds  
347 ratio, as estimated using the PO model, provides a reasonable global assessment of treatment  
348 effectiveness. However, derived quantities such as the difference in means may be more  
349 sensitive to violations of the PO assumption. Deviations from proportional odds will be examined  
350 by separately estimating the odds ratio for each possible dichotomization (that preserves  
351 ordering) of the primary outcome (e.g., alive versus dead at day 28, alive and oxygen free for at

352 least 10 days at day 28 versus alive and oxygen free for fewer than 10 days or dead at day 28,  
353 etc.), in a planned sensitivity analysis. These analyses will be implemented using the logistic  
354 regression method described below (see *Logistic Regression (LogR)*). No hypothesis testing will  
355 be implemented regarding the PO assumption.  
356

357 *Analysis of partially observed or missing outcome data* requires assumptions regarding the  
358 mechanism by which censoring and missing values arise. The likelihood method described  
359 above, and other similar methods such as multiple imputation assume that missing values occur  
360 at random (i.e., missing at random or MAR). However, because censored and missing values  
361 cannot be observed, assumptions about the missingness mechanism are not verifiable. In order  
362 to assess the sensitivity of study findings to violations of this assumption, we will conduct  
363 additional sensitivity analyses by reproducing the primary analysis under alternative  
364 assumptions regarding the mechanism for missing values. Specifically, we will perform  
365 sensitivity analyses that vary assumptions about the missing outcomes on the two treatment  
366 arms separately. These analyses will consider the following two scenarios: 1 “missing favors  
367 inefficacy”) each partially observed primary outcome in the placebo group will be assumed to  
368 have taken the highest/best possible value, whereas each partially observed primary outcome in  
369 the intervention group will be assumed to have taken the lowest/worst possible value, and 2  
370 “missing favors efficacy”) each partially observed primary outcome in the placebo group will be  
371 assumed to have taken the lowest/worst possible value, whereas each partially observed  
372 primary outcome in the intervention group will be assumed to have taken the highest/best  
373 possible value. These analyses will be implemented using the primary analysis methodology,  
374 including an assessment of hypothesis testing outcomes. For any trial under this platform, if  
375 there is a conclusion of efficacy at the final analysis, and the conclusion would have been  
376 different under the “missing favors inefficacy” scenario, then an additional tipping-point analysis  
377 will be implemented to estimate the association between the degree to which missing values  
378 must favor inefficacy versus the probability the trial would have failed to conclude efficacy. In  
379 these analyses, the partially observed outcomes will be randomly imputed under the assumption  
380 that partially observed outcomes favor the inefficacy conclusion by a specified amount. The  
381 degree to which the partially observed outcomes favor inefficacy will be encoded using an odds  
382 ratio that adjusts the outcome probabilities conditional on the participant covariates, using the  
383 maximum a posteriori (MAP) estimate at the final analysis. These probabilities will then be used  
384 to randomly sample the outcome for imputation purposes. For partially observed outcomes that  
385 exclude some levels of the outcome, the sampling probabilities for the excluded levels will be  
386 set to zero and the remaining probabilities normalized to sum to one. After sampling the  
387 outcome for all partially observed outcomes, the primary analysis will then be implemented  
388 using the imputed outcome data and the study conclusion recorded. This process will be  
389 repeated 1000 times and the probability of a trial conclusion other than efficacy will be  
390 calculated using a Monte-Carlo estimate. This process will again be repeated for a range of  
391 odds ratios encoding the degree to which the partially observed outcomes favor inefficacy. The  
392 results of this sensitivity analysis will be summarized graphically.  
393

394 Co-enrollment in other studies testing COVID-19 therapeutics may occur. Co-enrollment may  
395 affect the treatment effect estimates if there is effect modification associated with co-enrollment.  
396 We expect co-enrollment to occur in fewer than 5% of patients enrolled in the trial. However,  
397 because the decision to co-enroll is not affected by the treatment assignment in ACTIV 4 Host  
398 Tissue, co-enrollment will not favor any particular treatment. In addition, due to its rarity, we  
399 expect co-enrollment to have little impact on the estimated treatment effects, even when there is  
400 effect modification.  
401

402 Differential treatment effect, also referred to as heterogeneity of treatment effect, refers to  
403 differences in efficacy as a function of pre-existing patient characteristics such as baseline  
404 variables. This is often assessed by forming subgroups or using an interaction analysis.  
405 Supplemental interaction analyses will be implemented to examine the potential for differential  
406 treatment effect. Differential treatment effect will be examined in strata defined by (but not  
407 limited to) respiratory support category at enrollment, status of co-enrollment in an open label  
408 clinical trial of antiplatelet agents (ACTIV 4a), age category, SARS-CoV-2 vaccination status,  
409 passive immunity status, co-enrollment in other studies, and concomitant use of study drug and  
410 other medications during the study drug administration period. These analyses will be  
411 implemented using a modified version of the primary analysis method, where the treatment  
412 effect will be estimated separately for each level of the stratification variable. Stratum-specific  
413 treatment effect estimates will be presented with 95% Bayesian confidence interval. No formal  
414 hypothesis testing will be implemented for these analyses. Studies under this master protocol  
415 will be sized only for assessing efficacy using the primary analysis. Thus, there may be  
416 inadequate power to examine differential treatment.  
417

### 418 **6.6 Sample Size and Decision Thresholds**

419 The maximum number of participants to be enrolled in sub studies under the Master Protocol is  
420 600 participants per trial, resulting in approximately 300 patients per active treatment arm, and  
421 300 patients in the matching placebo arm. The placebo arm will be shared across all active  
422 treatment arms. We expect placebo participants to continue to accrue for as long as there are  
423 additional treatments to test and cases to enroll.

424 Type-I error and power regarding the analysis of the primary outcome was assessed based on  
425 the pooled (across all active and placebo arms) distribution of the primary outcome among the  
426 first 100 participants to complete follow-up and monitoring. The efficacy threshold was identified  
427 using statistical simulation under the null hypothesis to ensure the study operating  
428 characteristics achieve design specifications. Pooled and blinded summaries of oxygen-free  
429 days at day 28 were used to approximate the distribution of the oxygen free days in the placebo  
430 group. Based on these data, the anticipated frequency distribution, mean, and median of  
431 oxygen-free days (OFDs) for the placebo group, and for the treatment group under hypothetical  
432 effect sizes computed using the PO model are displayed in the table below.

| OFDs / Odds Ratio | Placebo | Inferiority |       | Superiority |       |       |       |       |       |       |
|-------------------|---------|-------------|-------|-------------|-------|-------|-------|-------|-------|-------|
|                   |         | 0.67        | 0.80  | 1.40        | 1.45  | 1.50  | 1.55  | 1.60  | 1.65  | 1.70  |
| Mean              | 8.8     | 6.6         | 7.5   | 10.8        | 11.1  | 11.3  | 11.5  | 11.7  | 11.9  | 12.0  |
| Median            | 0       | 0           | 0     | 6.5         | 7.5   | 9.0   | 10.0  | 10.5  | 12.5  | 14.5  |
| P(OFDs >= 22)     | 0.19    | 0.14        | 0.16  | 0.25        | 0.26  | 0.26  | 0.27  | 0.28  | 0.29  | 0.29  |
| Proportion:       |         |             |       |             |       |       |       |       |       |       |
| -1 (death)        | 0.235   | 0.316       | 0.279 | 0.181       | 0.176 | 0.171 | 0.166 | 0.162 | 0.158 | 0.154 |
| 0                 | 0.296   | 0.314       | 0.309 | 0.268       | 0.264 | 0.261 | 0.257 | 0.254 | 0.251 | 0.247 |
| 1                 | 0.006   | 0.006       | 0.006 | 0.006       | 0.006 | 0.006 | 0.006 | 0.006 | 0.006 | 0.006 |
| ---               | ---     | ---         | ---   | ---         | ---   | ---   | ---   | ---   | ---   | ---   |
| 27                | 0.050   | 0.034       | 0.041 | 0.069       | 0.072 | 0.074 | 0.076 | 0.078 | 0.081 | 0.083 |
| 28                | 0.000   | 0.000       | 0.000 | 0.000       | 0.000 | 0.000 | 0.000 | 0.000 | 0.000 | 0.000 |

433  
434 Based on these data and effect size scenarios, a series of statistical simulations were  
435 implemented to examine the operating characteristics of the statistical study design described  
436 above, including the plan for randomization, statistical analysis method, interim analysis, and

437 final assessments of efficacy using the odds ratio. In each simulation, participant age group,  
438 sex, and baseline WHO COVID severity score were randomly sampled with replacement from  
439 the values observed, and their effects on the primary outcome were simulated to match the  
440 estimated effects of age group, sex, and WHO score on the primary outcome among the first  
441 100 participants. In order to assess the potential impact of attrition and loss-to-follow-up,  
442 partially observed oxygen free days were simulated to match the observed frequency of partially  
443 observed outcomes, which occurred in 12% of the first 100 participants. To encode attrition, a  
444 subset of the simulated study participants was selected at random, each with probability 0.12.  
445 The primary outcome for each selected participant was encoded as partially observed by  
446 assuming that oxygen free days may have taken any value between -1 and a randomly sampled  
447 value ranging from the simulated oxygen free days to 28. For example, if the simulated oxygen  
448 free days is 10, then a value between 10 and 28 is sampled uniformly at random and this value  
449 is treated at the upper limit for the partially observed oxygen free days. This pattern of partially  
450 observed oxygen free days closely resembles the patterns observed among the first 100  
451 participants. All simulation analyses, including those associated with interim and final  
452 assessment of efficacy and inferiority were implemented using the methods described above for  
453 the analysis of the primary outcome.

454  
455 Simulation under the null hypothesis was used to select the efficacy threshold for the final  
456 analysis. The efficacy threshold was selected to ensure no more than 2.5% type-I error. In this  
457 simulation, 10000 replicates were used to ensure ~0.31% simulation margin of error in  
458 estimating the type-I error rate. The efficacy threshold was identified as 0.976. The efficacy and  
459 inferiority/harm thresholds will be applied as described in the table below. If neither condition is  
460 met for a conclusion of efficacy or inferiority/harm at the final analysis, the trial is inconclusive.

| Analysis         | Condition                                                                                    | Result                    |
|------------------|----------------------------------------------------------------------------------------------|---------------------------|
| Interim analysis | Inferiority/harm probability > 0.950                                                         | Halt enrollment           |
| Final analysis   | Inferiority/harm probability ≤ 0.95 at all interim analyses and efficacy probability > 0.976 | Conclude efficacy         |
| Final analysis   | Inferiority/harm probability > 0.950                                                         | Conclude inferiority/harm |

461 Using the selected efficacy and inferiority/harm thresholds, the results of 10000 simulations  
462 under the null hypothesis, and 1000 simulations per inferiority/efficacy scenario are summarized  
463 in the table below. In these simulations, the type-I error probability was 2.47%. The frequency of  
464 stopping early for inferiority under the null was 8.6% (5.3% at the first interim analysis, and 3.2%  
465 at the second interim analysis). *A maximum sample size of 600 participants per trial provides  
466 greater than 85% power to detect an odds ratio of 1.65, corresponding to a 3.1-day difference in  
467 mean OFDs, and a 7.8 percentage point reduction in 28-day mortality.* Differences larger than 2  
468 ventilator-free days on average have been considered clinically important in prior trials.<sup>2-4</sup> Thus,  
469 *the minimum detectable effect with 85% power (MDE85) is an odds ratio of 1.65.* The frequency  
470 of stopping early for inferiority when there was an effect larger than OR=1.40 was <1%. When  
471 the simulated treatment was inferior/harmful relative to placebo, at OR=0.67, a conclusion of  
472 inferiority/harm occurred in 83.3% of simulated trials (39.1%at the first interim, 27.9% at the  
473 second interim, and 16.3% at the final analysis), and the average half-sample size was 193.9  
474 per arm.

|                   | Null         | Inferiority |       | Superiority  |              |              |              |              |              |              |
|-------------------|--------------|-------------|-------|--------------|--------------|--------------|--------------|--------------|--------------|--------------|
| OFDs / Odds Ratio | 1.00         | 0.67        | 0.80  | 1.40         | 1.45         | 1.50         | 1.55         | 1.60         | 1.65         | 1.70         |
| Pr(Efficacy)      | <b>0.025</b> | 0.000       | 0.001 | <b>0.552</b> | <b>0.631</b> | <b>0.705</b> | <b>0.782</b> | <b>0.826</b> | <b>0.856</b> | <b>0.893</b> |

| OFDs / Odds Ratio | Null  | Inferiority |       | Superiority |       |       |       |       |       |       |
|-------------------|-------|-------------|-------|-------------|-------|-------|-------|-------|-------|-------|
|                   | 1.00  | 0.67        | 0.80  | 1.40        | 1.45  | 1.50  | 1.55  | 1.60  | 1.65  | 1.70  |
| Pr(Inferiority)   | 0.108 | 0.833       | 0.508 | 0.003       | 0.002 | 0.001 | 0.000 | 0.000 | 0.001 | 0.000 |
| Pr(Inconclusive)  | 0.867 | 0.167       | 0.491 | 0.445       | 0.366 | 0.294 | 0.218 | 0.173 | 0.143 | 0.107 |
| Average(N/2)      | 286.1 | 193.9       | 242.0 | 299.4       | 299.8 | 299.8 | 300.0 | 300.0 | 299.8 | 300.0 |

475  
476  
477  
478  
479  
480  
481  
482  
483  
484

In order to characterize the effect of uncertainty in the distribution of the OFD outcome on the type-I error probability, simulations under the null hypothesis were twice repeated assuming a “mild” and “severe” distribution for the OFD outcome. The mild and severe distributions were selected such that the unadjusted mortality rate ranged  $\pm 3\%$  relative to the initial simulation. The results of 1000 simulations in each of the mild placebo and severe placebo scenarios are summarized in the table below. In these simulations, the type-I error probability was 2.5% and 2.3%.

|                  | Severe       | Mild         |
|------------------|--------------|--------------|
|                  | OR = 1.00    | OR = 1.00    |
| Mortality rate   | 0.266        | 0.206        |
| Pr(Efficacy)     | <b>0.023</b> | <b>0.025</b> |
| Pr(Inferiority)  | 0.0119       | 0.117        |
| Pr(Inconclusive) | 0.858        | 0.858        |
| Average(N)       | 284.0        | 286.4        |

485  
486  
487  
488  
489  
490  
491  
492  
493  
494  
495  
496  
497

Prior to the start of enrollment, initial sample size assessments were based on pooled and blinded summaries of OFDs from the PassItOn (convalescent plasma) trial of patients hospitalized for COVID-19. The inclusion and exclusion criteria for PassItOn are similar to that for ACTIV 4 Host Tissue. In these initial assessments, the estimated MDE85 was OR=1.55. Statistical power was subsequently reassessed using OFDs summaries in the first 100 participants enrolled in ACTIV 4 Host Tissue, which demonstrated a more severe distribution relative to PassItOn participants (23.6% vs 17.6% mortality). The estimated MDE85 was OR=1.65 at the time of sample size reassessment. However, additional information from blinded summaries of the first 200 enrolled participants are consistent with the distribution of OFDs observed in PassItOn (18.6% vs 17.6% mortality). After discussion of these findings among the blinded study investigators and study sponsor, it was determined that statistical power was sufficient and no sample size adjustment was warranted.

498  
499

## 7 ANALYSIS OF SECONDARY, EXPLORATORY, AND SAFETY OUTCOMES

Final analysis of the secondary, exploratory, and safety outcomes will be implemented separately for each study arm by comparing each active drug group with the corresponding pooled placebo comparator group. The effect of active agent versus placebo on the odds of binary and ordinal outcomes will be quantified using logistic and proportional odds logistic regression. Quantitative outcomes will be analyzed using a linear regression method. In order to preserve consistency across statistical analyses, we will uniformly apply a Bayesian approach using flat priors. Odds ratio, hazard ratio, and differences in mean estimates will be presented with a 95% credible interval.

508



509 **7.1 Statistical Methods for Secondary, Exploratory, and Safety Analyses**

510 The methods described below will be applied uniformly to the examine the effect of each active  
511 drug versus the placebo comparator on the secondary, exploratory, and safety outcomes, as  
512 appropriate.  
513

514 **7.1.1 Proportional Odds Logistic Regression (POLR)**

515 Ordinal secondary, exploratory, and safety outcomes will be analyzed using a method similar to  
516 that described above for the analysis of the primary outcome, using proportional odds logistic  
517 regression (POLR), and adjusting for participant age group, sex, and WHO COVID ordinal  
518 severity at baseline. The effect of the active drug versus placebo will be presented using an  
519 odds ratio which quantifies the treatment effect on the odds of greater values of the ordinal  
520 outcome. The odds ratio will be presented with 95% credible interval. A flat prior distribution will  
521 be used for all model parameters. The posterior distribution for the log odds ratio will be  
522 approximated using the Laplace method. All statistical inferences about the odds ratio will be  
523 made using this method. The proportional odds assumption means that the odds-ratio has the  
524 same interpretation for all dichotomizations (that preserve ordering) of the ordinal outcome. The  
525 repeated dichotomization method, as described for the analysis of the primary outcome, will be  
526 used to assess for severe violations of the proportional odds assumptions. Missing or partially  
527 observed outcomes will be handled using the likelihood method as described for the primary  
528 analysis (see *Loss to Follow-up, Censoring, and Intercurrent Events*).  
529

530 **7.1.2 Logistic Regression (LogR)**

531 Binary secondary, exploratory, and safety outcomes will be analyzed using logistic regression  
532 (LogR), and adjusting for participant age group, sex, and WHO COVID ordinal severity at  
533 baseline. The effect of the active drug versus placebo will be presented using an odds ratio  
534 which quantifies the treatment effect on the odds of outcome occurrence. The odds ratio will be  
535 presented with 95% credible interval. In addition, to facilitate clinical interpretability and  
536 meaningfulness, the difference in proportions corresponding to the most common (modal)  
537 values of the adjustment variables will be presented with 95% credible interval. A flat prior  
538 distribution will be used for all model parameters. The posterior distribution for the log odds ratio  
539 will be approximated using the Laplace method. All statistical inferences about the odds ratio  
540 and other posterior quantities will be made using this method. Missing outcomes will be handled  
541 using the likelihood method as described for the primary analysis (see *Loss to Follow-up,*  
542 *Censoring, and Intercurrent Events*).  
543

544 **7.1.3 Linear Regression (LinR)**

545 Quantitative exploratory will be analyzed using linear regression (LinR), and adjusting for  
546 participant age group, sex, and WHO COVID ordinal severity at baseline. The effect of the  
547 active drug versus placebo will be presented using a difference in means. The difference in  
548 means will be presented with 95% credible interval. A flat prior distribution will be used for all  
549 model parameters. The posterior distribution for the difference in means will be approximated  
550 using the Laplace method. All statistical inferences about the difference in means will be made  
551 using this method. Graphical regression diagnostics, including normal Q-Q plots, will be used to  
552 assess for severe violations of the linear regression assumptions. Missing exploratory outcomes  
553 will be omitted from linear regression analyses.  
554

555 **7.1.4 Key Secondary Outcome Testing Procedure**

556 A fixed-sequence testing approach will be used to preserve the type-I error rate across tests of  
557 the primary and key secondary outcomes. The key secondary outcomes will be tested in the  
558 specified order (see *Secondary Outcomes*). This approach provides strong control of the

559 familywise type-I error rate for the family of primary and key secondary outcomes. No other  
560 formal hypothesis tests will be made regarding the secondary, exploratory, or safety outcomes.

561  
562 All key secondary outcomes use Bayesian logistic regression with a flat prior. Thus, the log  
563 odds ratio estimate is also a maximum likelihood estimate (MLE). At the final analysis (only) for  
564 each arm and key secondary outcome, efficacy will be indicated using a one-sided likelihood-  
565 based Wald test, to ensure a type-I error probability of 2.5% for each test. Specifically, a one-  
566 sided test of the null hypothesis ( $\log OR = 0$ ) will be computed by approximating the asymptotic  
567 distribution of the MLE under the null hypothesis: a Gaussian distribution with mean zero and  
568 variance equal to the inverse observed Fisher information. For descriptive purposes, evidence  
569 for efficacy will also be quantified using the posterior probability that the efficacy odds ratio is  
570 greater than one (i.e., treatment is associated with greater odds of a favorable outcome). This is  
571 denoted the “posterior probability for efficacy” or  $P(OR > 1|Data)$ , where OR represents the odds  
572 ratio, and Data represents the mITT analysis dataset.

## 574 **7.2 Analysis of Safety, Adherence, and Retention Outcomes for DSMB Review**

575 Monitoring and reporting of safety events will be conducted continuously as described in the  
576 Data and Safety Monitoring Plan. Records will undergo monitoring for a two-week period (at  
577 minimum) prior to interim analysis for inferiority or futility. However, all records, regardless of  
578 monitoring status, will be used in enrollment, demographic, and safety summaries for DSMB  
579 safety reporting. Agent-specific safety and toxicity endpoints (if any) are detailed in that  
580 therapy’s appendix. The frequencies of PSESEs, adverse events, mortality, and other safety  
581 endpoints will be reported. Screening, enrollment, withdrawal, loss-to-follow-up, mortality, study  
582 completion, hospitalization status and discharge location will be summarized in a similar  
583 manner. All safety-related protocol violations will be listed in the DSMB report. Receipt of  
584 planned therapy and adverse events will be recorded on case report forms and monitored  
585 continuously. Study drug stoppages and adverse events will be summarized and reported to the  
586 DSMB.

## 588 **8 DATA FLOW, SHARING, AND ARCHIVING**

### 590 **8.1 Requests for secondary use of the data**

591 Requests for secondary use of study data must adhere to review, approval, and provision  
592 processes developed by ACTIV 4 Host Tissue leadership and must comply with all applicable  
593 rules and regulations. All study data will be de-identified prior to sharing for secondary use.

### 595 **8.2 Data flow for final and interim analyses**

596 All data necessary for interim analyses, final analyses, and DSMB reporting will be exported  
597 from the EDC using the REDCap API. A custom R script will be used to both export the data  
598 and perform the interim analyses.

### 600 **8.3 Archival data model**

601 Data will remain in the production database. At the time of data locking, all users will be moved  
602 to read only access or removed, or as specified in the Data Management Plan.

### 604 **8.4 Final analysis procedure**

605 Once a study arm has completed enrollment, follow-up, and monitoring for all participants, all  
606 records that contribute to final analyses will be locked. Final analysis will be executed promptly  
607 after data lock, regardless of the status of other study arms. Blinded personnel will remain

608 blinded to the active/placebo status for individual participants until all arms that share blinded  
609 information with the completed arm have also been completed and their records locked. Final  
610 analyses will be executed by unblinded personnel only. Reporting of final analyses should avoid  
611 revealing the blinded treatment assignment for individual participants.  
612

## 613 9 REFERENCES

- 614
- 615 1. Weins BL. A fixed sequence Bonferroni procedure for testing multiple  
616 endpoints. *Pharmaceutical Statistics*, 2003; 2:211-215.
- 617 2. Schoenfeld DA, Bernard GR, ARDS Network. Statistical evaluation of ventilator-free days as  
618 an efficacy measure in clinical trials of treatments for acute respiratory distress syndrome.  
619 *Crit Care Med*. 2002 Aug;30(8):1772–1777. PMID: 12163791
- 620 3. National Heart, Lung, and Blood Institute Acute Respiratory Distress Syndrome (ARDS)  
621 Clinical Trials Network, Wiedemann HP, Wheeler AP, Bernard GR, Thompson BT, Hayden  
622 D, deBoisblanc B, Connors AF, Hite RD, Harabin AL. Comparison of two fluid-management  
623 strategies in acute lung injury. *N Engl J Med*. 2006 Jun 15;354(24):2564–2575. PMID:  
624 16714767
- 625 4. Laterre P-F, Berry SM, Blemings A, Carlsen JE, François B, Graves T, Jacobsen K, Lewis  
626 RJ, Opal SM, Perner A, Pickkers P, Russell JA, Windeløv NA, Yealy DM, Asfar P, Bestle  
627 MH, Muller G, Bruel C, Brulé N, Decruyenaere J, Dive A-M, Dugernier T, Krell K, Lefrant J-  
628 Y, Megarbane B, Mercier E, Mira J-P, Quenot J-P, Rasmussen BS, Thorsen-Meyer H-C,  
629 Vander Laenen M, Vang ML, Vignon P, Vinatier I, Wichmann S, Wittebole X, Kjølbye AL,  
630 Angus DC, SEPSIS-ACT Investigators. Effect of Selepressin vs Placebo on Ventilator- and  
631 Vasopressor-Free Days in Patients With Septic Shock: The SEPSIS-ACT Randomized  
632 Clinical Trial. *JAMA*. 2019 Oct 2; PMID: PMC6802260
- 633 5. Self WH, Semler MW, Wanderer JP, Wang L, Byrne DW, Collins SP, Slovis CM, Lindsell CJ,  
634 Ehrenfeld JM, Siew ED, Shaw AD, Bernard GR, Rice TW, SALT-ED Investigators. Balanced  
635 Crystalloids versus Saline in Noncritically Ill Adults. *N Engl J Med*. 2018 01;378(9):819–828.  
636 PMID: PMC5846618
- 637 6. Self WH, Semler MW, Leither LM, Casey JD, Angus DC, Brower RG, Chang SY, Collins SP,  
638 Eppensteiner JC, Filbin MR, Files DC, Gibbs KW, Ginde AA, Gong MN, Harrell FE, Hayden  
639 DL, Hough CL, Johnson NJ, Khan A, Lindsell CJ, Matthay MA, Moss M, Park PK, Rice TW,  
640 Robinson BRH, Schoenfeld DA, Shapiro NI, Steingrub JS, Ulysse CA, Weissman A, Yealy  
641 DM, Thompson BT, Brown SM, National Heart, Lung, and Blood Institute PETAL Clinical  
642 Trials Network, Steingrub J, Smithline H, Tiru B, Tidswell M, Kozikowski L, Thornton-  
643 Thompson S, De Souza L, Hou P, Baron R, Massaro A, Aisiku I, Fredenburgh L, Seethala  
644 R, Johnsky L, Riker R, Seder D, May T, Baumann M, Eldridge A, Lord C, Shapiro N, Talmor  
645 D, O'Mara T, Kirk C, Harrison K, Kurt L, Schermerhorn M, Banner-Goodspeed V, Boyle K,  
646 Dubosh N, Filbin M, Hibbert K, Parry B, Lavin-Parsons K, Pulido N, Lilley B, Lodenstein C,  
647 Margolin J, Brait K, Jones A, Galbraith J, Peacock R, Nandi U, Wachs T, Matthay M, Liu K,  
648 Kangelaris K, Wang R, Calfee C, Yee K, Hendey G, Chang S, Lim G, Qadir N, Tam A,  
649 Beutler R, Levitt J, Wilson J, Rogers A, Vojnik R, Roque J, Albertson T, Chenoweth J,  
650 Adams J, Pearson S, Juarez M, Almasri E, Fayed M, Hughes A, Hillard S, Huebinger R,  
651 Wang H, Vidales E, Patel B, Ginde A, Moss M, Baduashvili A, McKeegan J, Finck L, Higgins  
652 C, Howell M, Douglas I, Haukoos J, Hiller T, Lyle C, Cupelo A, Caruso E, Camacho C,  
653 Gravitz S, Finigan J, Griesmer C, Park P, Hyzy R, Nelson K, McDonough K, Olbrich N,  
654 Williams M, Kapoor R, Nash J, Willig M, Ford H, Gardner-Gray J, Ramesh M, Moses M, Ng  
655 Gong M, Aboodi M, Asghar A, Amosu O, Torres M, Kaur S, Chen J-T, Hope A, Lopez B,  
656 Rosales K, Young You J, Mosier J, Hypes C, Natt B, Borg B, Salvaggio Campbell E, Hite RD,

- 657 Hudock K, Cresie A, Alhasan F, Gomez-Arroyo J, Duggal A, Mehkri O, Hastings A, Sahoo  
658 D, Abi Fadel F, Gole S, Shaner V, Wimer A, Meli Y, King A, Terndrup T, Exline M, Pannu S,  
659 Robart E, Karow S, Hough C, Robinson B, Johnson N, Henning D, Campo M, Gundel S,  
660 Seghal S, Katsandres S, Dean S, Khan A, Krol O, Jouzestani M, Huynh P, Weissman A,  
661 Yealy D, Scholl D, Adams P, McVerry B, Huang D, Angus D, Schooler J, Moore S, Files C,  
662 Miller C, Gibbs K, LaRose M, Flores L, Koehler L, Morse C, Sanders J, Langford C, Nanney  
663 K, MdalaGausi M, Yeboah P, Morris P, Sturgill J, Seif S, Cassity E, Dhar S, de Wit M,  
664 Mason J, Goodwin A, Hall G, Grady A, Chamberlain A, Brown S, Bledsoe J, Leither L,  
665 Peltan I, Starr N, Fergus M, Aston V, Montgomery Q, Smith R, Merrill M, Brown K,  
666 Armbruster B, Harris E, Middleton E, Paine R, Johnson S, Barrios M, Eppensteiner J,  
667 Limkakeng A, McGowan L, Porter T, Bouffler A, Leahy JC, deBoisblanc B, Lammi M, Happel  
668 K, Lauto P, Self W, Casey J, Semler M, Collins S, Harrell F, Lindsell C, Rice T, Stubblefield  
669 W, Gray C, Johnson J, Roth M, Hays M, Torr D, Zakaria A, Schoenfeld D, Thompson T,  
670 Hayden D, Ringwood N, Oldmixon C, Ulysse C, Morse R, Muzikansky A, Fitzgerald L,  
671 Whitaker S, Lagakos A, Brower R, Reineck L, Aggarwal N, Bienstock K, Freemer M,  
672 Maclawiw M, Weinmann G, Morrison L, Gillespie M, Kryscio R, Brodie D, Zareba W,  
673 Rompalo A, Boeckh M, Parsons P, Christie J, Hall J, Horton N, Zoloth L, Dickert N, Diercks  
674 D. Effect of Hydroxychloroquine on Clinical Status at 14 Days in Hospitalized Patients With  
675 COVID-19: A Randomized Clinical Trial. JAMA. 2020 Dec 1;324(21):2165–2176. PMID:  
676 PMC7653542
- 677 7. Harrell, Frank. General COVID-19 Therapeutics Trial Design [Internet]. 2020. Available from:  
678 <https://hbiostat.org/proj/covid19/statdesign.html>
- 679 8. Zhenming S, McCullagh P. Laplace approximation of high dimensional integrals. Journal of  
680 the Royal Statistical Society. 1995;57(4):749–760.
- 681 9. Doob J. The limiting distributions of certain statistics. The Annals of Mathematical Statistics.  
682 1935 Sep 1;6(3):160–169.
- 683 10. Simpson DG, Carroll RJ, Zhou H, Guth DJ. Interval Censoring and Marginal Analysis in  
684 Ordinal Regression. Journal of Agricultural, Biological, and Environmental Statistics. 1996  
685 Sep;1(3):354.
- 686 11. Food and Drug Administration. E9(R1) Statistical Principles for Clinical Trials: Addendum:  
687 Estimands and Sensitivity Analysis in Clinical Trials [Internet]. 2017. Available from:  
688 <https://www.fda.gov/media/108698/download>
- 689 12. Liu Q, Shepherd BE, Li C, Harrell FE. Modeling continuous response variables using ordinal  
690 regression. Stat Med. 2017 Nov 30;36(27):4316–4335. PMID: PMC5675816
- 691 13. Harrell, Frank. Violation of Proportional Odds is Not Fatal | Statistical Thinking [Internet].  
692 2020. Available from: <https://www.fharrell.com/post/po/>
- 693  
694

## 695 10 APPENDIX: ALGORITHM TO COMPUTE PRIMARY OUTCOME

696  
697 The primary outcome is oxygen-free days at study day 28. It can take values -1, 0, 2, ..., 27, 28.  
698 When computing oxygen free days, the “outcome” for each participant should be a length 30  
699 vector of zeros and ones that indicate which of the 30 possible values (-1, 0, 2, ..., 27, 28) that  
700 OFDs could take for that participant. This representation allows for arbitrary censoring of the  
701 outcome. For example [0,1,1,0,0,...,0] indicates that OFDs could be either 0 or 1. If there is loss-  
702 to-follow-up, withdrawal, or missing follow-up information, there can be interval censoring. The  
703 algorithm below is designed to compute OFDs in this representation.

- 704  
705
- If participant was deceased by study day 28, OFDs is [1,0,0,0,0,...,0]

- 706 • For study day 1 through 28, compute whether or not supplemental oxygen was used  
707 (code with “yes” or “no”), or if supplemental oxygen use was uncertain (code with “?”).  
708 ○ For our purposes supplemental oxygen means oxygen use that exceeds any pre-  
709 enrollment home oxygen use. Home oxygen use is recorded in the “Medical  
710 History” form in variables mhco2, mhio2, and the amount (L/m) in field home\_ox.  
711 If a participant had not used pre-enrollment home oxygen, then it should be  
712 assumed that all hospital and post-discharge use of oxygen counts against  
713 oxygen-free days. If a participant had used pre-enrollment home oxygen, then  
714 only the supplemental oxygen use that exceeds the amount used at home should  
715 count against oxygen-free days. If the participant is in the inpatient phase of the  
716 study and using standard supplemental oxygen (o2type = “O2 by mask or nasal  
717 prongs”), then the L/m recorded on the vitals signs form (o2\_lpm\_cannula\_sofa)  
718 must exceed the amount used at home (home\_ox). If hospital oxygen use takes  
719 any other value except “No O2 therapy” and “O2 by mask or nasal prongs”, then  
720 that study day should count against oxygen free-days.  
721 ○ If the participant is in the outpatient phase of the study (i.e., after discharge from  
722 the enrollment admission or after 28 days, whichever comes first), but is not  
723 hospitalized, then only the post-discharge home oxygen use that exceeds the  
724 amount used at home prior to enrollment (if any) will count against oxygen-free  
725 days. The phone script and outpatient form are designed to record only the home  
726 oxygen use that exceeds any pre-hospitalization oxygen use.  
727 ○ If the participant is in the outpatient phase of the study, but is hospitalized, the  
728 branching logic on the outpatient form determines whether the participant had  
729 used oxygen. Any hospital oxygen use during the outpatient phase counts  
730 against oxygen-free days.  
731 ○ If the preceding calculations cannot be made for any particular study day, then  
732 the supplemental oxygen status is “?” for that study day.  
733 • The preceding step results in “yes”, “no”, or “?” for each study day 1 through 28.  
734 ○ If there are no “?” values, then OFDs is 28 minus the number of days between  
735 and including the days of the first “yes” and the last “yes”.  
736 ○ If there are “?” before the first “yes” or after the last yes, then OFDs is partially  
737 observed and multiple values are possible. To compute the possible values,  
738 consider each possible pair of first ‘yes’ and last ‘yes’ days, and compute the  
739 associated OFDs.  
740 OFDs should be represented as a vector of length 30, one element for each value that  
741 OFDs can take: -1, 0, 1, ..., 27, 28. There should be a 1 for each element that OFD that  
742 is possible for this participant, and a zero otherwise. The -1 (first) element should take a  
743 value 0 if the participant was known to be alive at day 28 and 1 otherwise.  
744

## 745 11 APPENDIX: CUMULATIVE LOGIT MODEL

### 746 747 11.1 Model Formulation

748 The cumulative logit model can be written in terms of the covariates  $X$  and an ordinal outcome  
749 variable  $G$ , where probabilities of outcome value  $g$  or smaller are modeled as follows  
750

$$\Pr(G \leq g|X) = \text{expit}(\alpha_g - X\beta). \#(1)$$

751 Without loss of generality, an outcome with  $p$  levels may be coded using the first  $p$  integers,  
752 such that  $g$  may take on the values  $1, \dots, p$ . In the expression above,  $\alpha_g$  is a scalar intercept,  
753

754 expit is the logistic (inverse logit) transformation, and the vector  $X$  contains coded baseline  
755 covariates and the active/placebo treatment indicator. The model has intercepts for each of the  
756 first  $p - 1$  outcome levels, and the intercepts must be ordered:  $\alpha_1 \leq \alpha_2 \leq \dots \leq \alpha_{p-1}$ . The  
757 ordering of intercepts ensures that the probabilities  $\Pr(G \leq g|X)$  are monotonically increasing in  
758  $g$ . The parameter vector  $\beta$  represents the log odds ratios (OR) associated with the effects of  
759 covariates and group assignment. Specifically, the group assignment odds ratio represents the  
760 relative effect of treatment versus placebo on the odds  $\Pr(G > g|X)/(1 - \Pr(G > g|X))$ , for each  
761 of the first  $p - 1$  values that  $G$  may take.

762  
763 The  $p - 1$  linear predictors  $\alpha_g - X\beta$  represent the logit transformed cumulative probabilities  
764 associated with the first  $p - 1$  levels of the ordinal outcome, adjusted for the effects of  
765 covariates  $X$ . The probabilities that the outcome takes a specific value  $g$ , adjusted for covariates  
766  $X$ , is derived as follows:  
767

$$\Pr(G = g|X) = \text{expit}(\alpha_g - X\beta) - \text{expit}(\alpha_{g-1} - X\beta), \#(2)$$

768  
769 where  $\text{expit}(\alpha_0 - X\beta)$  and  $\text{expit}(\alpha_p - X\beta)$  are defined to be 0 and 1, respectively.  
770 When there are partially observed ordinal outcomes, it is convenient to recode the outcome as a  
771 vector  $Y = [Y_1, \dots, Y_p]$ , such that  $Y_g = 1$  if  $G = g$  or when  $g$  is one of the values that  $G$  might have  
772 taken if the outcome were fully observed, and  $Y_g = 0$  otherwise. Thus, the cumulative logit  
773 model may be written as follows  
774

$$\Pr(Y_1 = 1 \cup Y_2 = 1 \cup \dots \cup Y_g = 1|X) = \Pr(G \leq g|X) = \text{expit}(\alpha_g - X\beta). \#(3)$$

775  
776 Denote a sample of covariate vectors  $x_1, \dots, x_N$  and outcomes  $g_1, \dots, g_N$ , and corresponding  
777 outcome vectors  $y_1, \dots, y_N$ , where  $y_i = [y_{i1}, \dots, y_{ip}]$ . Using this representation, partially observed  
778 outcomes are encoded by assigning a value 1 to each element of  $y_i$  that the outcome  $g_i$  might  
779 have taken if fully observed. For example, if  $g_i$  might have taken values 1 or 2, but other values  
780 were not possible, then  $y_i$  would be coded  $y_i = [1, 1, 0, \dots, 0]$ . Further denote the collection of  
781 model parameters  $\theta = [\alpha_1, \dots, \alpha_{p-1}, \beta]$ . Using this notation, the observed data likelihood is as  
782 follows:  
783

$$L(\theta|y_1 \dots y_N, x_1 \dots x_N) = \prod_{i=1}^N L_i(\theta|y_i, x_i) = \prod_{i=1}^N \sum_{j=1}^p I(y_{ij} = 1) \Pr(Y_j = 1 | X = x_i), \#(4)$$

784  
785 where  $I(\cdot)$  is the indicator function that takes a value 1 when its argument is true, and 0  
786 otherwise.  
787

788 In a Bayesian analysis, the posterior density function is proportional to the likelihood function  
789 multiplied by the prior density function as follows:  
790

$$P(\theta|y_1 \dots y_N, x_1 \dots x_N) \propto L(\theta|y_1 \dots y_N, x_1 \dots x_N)P(\theta) \#(5)$$

791  
792 A flat prior distribution, where  $P(\theta) \propto 1$ , is used for all model parameters. Thus, the posterior  
793 density is proportional to the likelihood function.

794

## 795 **11.2 Model-based Statistical Inferences**

796 The posterior distribution for the log odds ratio and any other required parameter is  
797 approximated using the Laplace method. A flat prior ensures the Laplace-approximated  
798 posterior distribution is identical to the approximate sampling distribution of the maximum  
799 likelihood estimate for  $\theta$ ; in both cases a normal distribution centered at the estimate (i.e., the  
800 maximum likelihood estimate or equivalently the maximum *a posteriori* estimate) with variance-  
801 covariance equal to the negative inverse Hessian of the log likelihood function (inverse  
802 observed Fisher information) evaluated at the estimate (see “Appendix: Laplace  
803 Approximation”). All statistical inferences about the odds ratio and derivative quantities  
804 (including all supplementary estimands) will be made using this method.  
805

## 806 **11.3 Model Fitting and Computation**

807 The cumulative logit model is implemented in the R code file “clm\_model.R”. Readers should  
808 examine the `clm_fit` function first, which is the entry point for model fitting, and then examine  
809 other functions as they are called by `clm_fit`. The function `clm_fit` takes as arguments the  
810 matrix of coded covariates  $x$ , and a matrix of coded outcomes  $y$ . Each matrix has one row per  
811 record (i.e., study participant). The covariate matrix has one column per coded covariate (e.g.,  
812 age group has three levels and thus requires two columns to distinguish the levels), and the  
813 outcome matrix has one column per value that the outcome might take. The cells of the  
814 outcome matrix  $y$  contain the values  $y_{ij}$  as defined above (see “Model Formulation”).  
815

816 In practice, when one or more levels of an ordinal outcome are not observed in the analysis  
817 data set, some of the model intercepts are not estimable (i.e., there is no unique set of model  
818 intercepts that maximizes the likelihood/posterior density function). To overcome this, each  
819 outcome level is characterized as “estimable” if there is at least one record in the analysis data  
820 set where that level is observed and no other level was possible (i.e., ignoring partially observed  
821 outcomes), and “not estimable” otherwise. Levels of the outcome that are not estimable are  
822 collapsed with the nearest adjacent estimable level to form a new level, e.g., levels 3, 4, and 5  
823 may be collapsed to form level “3|5”. When levels are collapsed, if any collapsed level was  
824 possible as part of a partially observed outcome, then the collapsed level is considered possible  
825 as well. This functionality is implemented by the function `clm_collapse`, which is called by  
826 `clm_fit` prior to any model fitting.  
827

828 The estimate of  $\theta$  is found by maximizing the log of the posterior density function (i.e., a  
829 maximum *a posteriori* estimate, or MAP for short) defined in expression (5). Note that the  
830 normalizing constant in expression (5) is not needed to identify the MAP estimate, nor is it  
831 necessary to form a Laplace approximation to the posterior density. The estimate of  $\theta$  is found  
832 using an iterative optimization algorithm, and the associated observed Fisher information is  
833 estimated using a finite difference method. These calculations are implemented using the R  
834 function `optim`, which uses the quasi-Newton “BFGS” method (Byrd, Lu, Nocedal, and Zhu,  
835 1995, A limited memory algorithm for bound constrained optimization. SIAM Journal on  
836 Scientific Computing, 16, 1190–1208. doi: 10.1137/0916069), and is built-in as part of the “stats”  
837 package for R (R Core Team, 2022, R: A language and environment for statistical computing. R  
838 Foundation for Statistical Computing, Vienna, Austria. URL <https://www.R-project.org/>). The  
839 initial values for  $\beta$  are set to zero. Initial values for the model intercepts are generated by first  
840 calculating the fraction of each observed outcome level (i.e., an initial estimate of  $\Pr(G = g|X)$   
841 where  $\beta = 0$ ), and then applying the inverse of expression (2) as follows:  
842

$$\alpha_g^{\text{init}} = \text{logit} \left( \sum_{k=1}^g \frac{\sum_i y_{ik}}{\sum_i \sum_j y_{ij}} \right). \#(6)$$

843  
844 The initial values calculations for the model intercepts are implemented by the function  
845 `clm_alpha_init`. Starting at the initial values, the `optim` function iteratively maximizes the  
846 `clm_optim` function, which computes the log of the posterior density function given by  
847 expression (5). The `clm_optim` function calls the `clm_loglik` and `clm_logpri` functions,  
848 which evaluate the log of the likelihood function given by expression (4) and log of the prior  
849 density function (defined to be zero for a flat prior), respectively. The `clm_loglik` function calls  
850 `clm_predict` which computes, for each record, the linear predictors,  
851  $\alpha_g - X\beta = \text{logit} \Pr(G \leq g|X)$ , and the associated covariate adjusted probabilities for each ordinal  
852 outcome level  $\Pr(G = g|X)$ . The `clm_predict` function calls `alphs_to_probs` to convert the  
853 logit cumulative probabilities to level specific probabilities according to expression (2). The  
854 `probs_to_alphs` function computes the inverse of `alphs_to_probs`.

855  
856 The `clm_fit` function returns a model fit object that contains a model convergence  
857 assessment, the MAP estimate for  $\theta$ , and the estimated Hessian of the log posterior density  
858 function evaluated at the estimate. The MAP estimate and Hessian are sufficient to define the  
859 Laplace (Normal) approximation to the posterior density, and are used to compute posterior  
860 cumulative probabilities as follows

$$861 \Pr(\theta_k \leq q | y_1 \dots y_N, x_1 \dots x_N) = \Phi \left( \frac{q - \hat{\theta}_k}{\sqrt{[-H^{-1}]_{kk}}} \right),$$

862  
863 where  $H$  is the estimated Hessian,  $\hat{\theta}$  is the MAP estimate, and  $\Phi$  is the standard normal  
864 cumulative density function. This is implemented by the `clm_ppost` function for specified scalar  
865 elements  $\theta_k$ . Notably, this function is used to compute the posterior probabilities used for  
866 decision-making at the interim and final analyses.

867  
868 For supplementary estimands,  $g(\theta)$ , that are smooth scalar functions of  $\theta$  (i.e., treatment  
869 difference in the mean of the primary outcome, and treatment difference in the probabilities  
870 associated with outcome categories -1 and 0), the posterior distribution will be approximated  
871 using the delta method, for example, to compute posterior cumulative probabilities as follows:  
872

$$873 \Pr(g(\theta) \leq q | y_1 \dots y_N, x_1 \dots x_N) = \Phi \left( \frac{q - g(\hat{\theta})}{\sqrt{g'(\hat{\theta})^T [-H^{-1}] g'(\hat{\theta})}} \right),$$

874  
875 Where  $g'(\hat{\theta})$  is the gradient of  $g(\cdot)$  evaluated at  $\hat{\theta}$ , which is approximated numerically using a  
876 finite difference method. For non-smooth scalar functions of  $\theta$  (i.e., treatment difference in the  
877 median of the primary outcome), the posterior distribution will be identified using a Monte Carlo  
878 method; by generating 10000 realizations from the posterior distribution for  $\theta$ , and evaluating  
879 the supplementary estimand using those realizations. For either approach, an equal-tailed, level  
880  $(1 - \alpha)$  credible interval will then be identified by selecting the  $\alpha/2$  and  $1 - \alpha/2$  quantiles of the  
881 approximate posterior distribution. The functions `clm_crint_delta` and  
882 `clm_crint_montecarlo` compute credible intervals for supplementary estimands using the  
883 two methods described above, respectively.  
884  
885



886 The four supplementary estimands include the treatment difference in mean and median of the  
887 primary outcome, and the treatment difference in probabilities associated with outcome levels -1  
888 and 0. Each of these estimands will be adjusted to the most common (modal) value for each  
889 covariate. The mean and median estimates are defined as the mean and median of the  
890 distribution defined by the cumulative probabilities associated with each outcome level, adjusted  
891 for covariates.

## 892 **12 APPENDIX: KEY SECONDARY OUTCOME TESTING PROCEDURE**

893 Each trial in the ACTIV 4 Host Tissue platform will separately use a fixed sequence method to  
894 control the familywise type-I error probability, i.e., the probability of erroneously concluding  
895 efficacy of the trial intervention with respect to any one or more of the primary and key  
896 secondary outcomes. Specifically, a conclusion of efficacy regarding the primary outcome will  
897 be required prior to testing the first designated key secondary outcome. Each subsequent key  
898 secondary outcome, in the designated order, will take place only if the preceding key secondary  
899 outcome demonstrates efficacy. This approach provides strong control of the familywise type-I  
900 error probability for the family of primary and key secondary outcomes. For weak familywise  
901 type-I error control (i.e., under the assumption that the intervention effect is null for all tests in  
902 the family), the fixed sequence method requires only that the test of the primary outcome (i.e.,  
903 the outcome tested first) have the specified type-I error rate. For strong type-I error control, the  
904 fixed sequence procedure requires that each individual test in the sequence have the desired  
905 type-I error probability, 2.5% for trials under the ACTIV 4 Host Tissue platform. Because the test  
906 of efficacy associated with the primary outcome has adaptive elements, including interim  
907 analyses, a statistical simulation (as described in the “Statistical Analysis Plan”) was  
908 implemented to identify the test characteristics that ensure a 2.5% type-I error probability for  
909 that test. Each key secondary outcome is tested for efficacy only at the final analysis. Thus,  
910 type-I error control for the key secondary outcomes relies on established theoretical arguments  
911 and methods.

912  
913 All key secondary outcomes use Bayesian logistic regression or proportional odds logistic  
914 regression. If key secondary outcome testing is required under the fixed sequence procedure,  
915 efficacy will be concluded if the posterior probability for efficacy ( $P(\text{OR} > 1 | \text{Data})$ ) for Alive and  
916 respiratory failure-free at day 28, and  $P(\text{OR} < 1 | \text{Data})$  for WHO 8-point ordinal scale at day 28  
917 and Mortality at day 28) exceeds 0.975.

918  
919 Because a flat prior is used, and the posterior is computed using a Laplace approximation, the  
920 maximum *a posteriori* estimate of the log odds ratio is identical to the maximum likelihood  
921 estimate (MLE), and the Laplace approximated posterior distribution is identical to the  
922 approximate sampling distribution of the MLE: a normal distribution with mean equal to the  
923 estimate and variance-covariance equal to the inverse observed Fisher information (see  
924 Appendix: Laplace Approximation). In conventional frequentist testing, efficacy is indicated  
925 when the estimate exceeds a critical value selected such that the frequency of this occurring  
926 under the null hypothesis is 0.025. Because of the equivalence between the approximate  
927 posterior and MLE sampling distributions, setting the posterior probability for efficacy threshold  
928 to 0.975 ensures that any estimate meeting this threshold must also exceed the critical value  
929 that ensures less than 2.5% type-I error frequency. The figure below illustrates this concept:

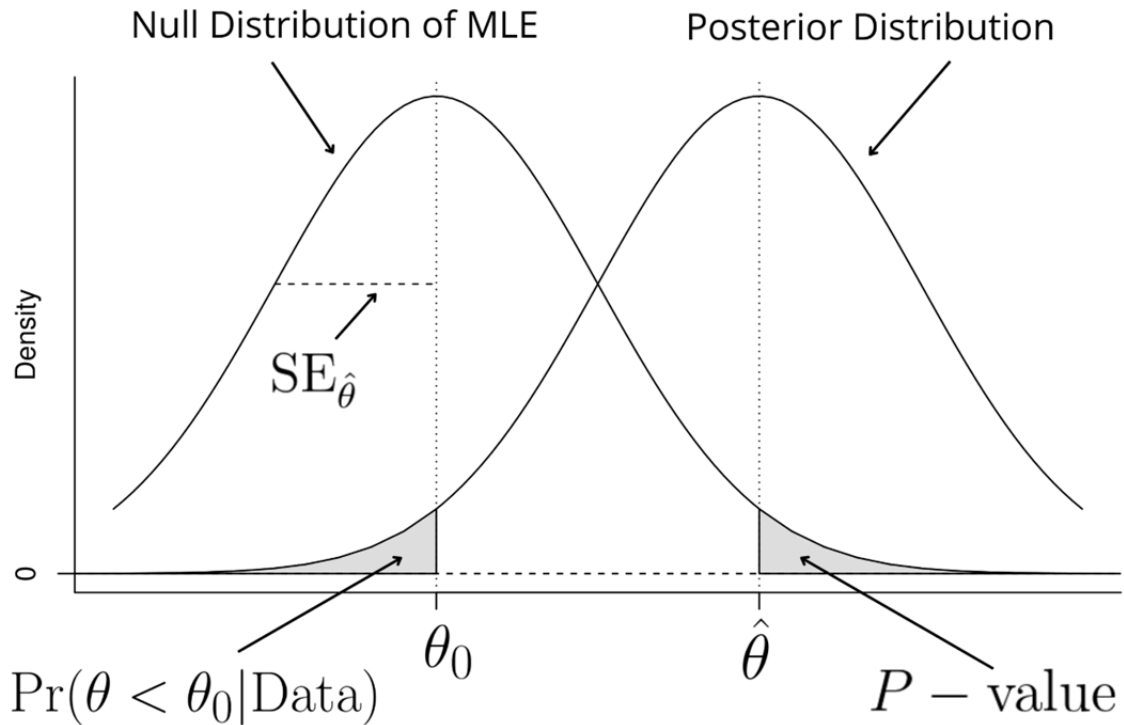

930

931 **13 APPENDIX: LAPLACE APPROXIMATION**

932

933 Let random variables  $Y_1 \dots Y_N$  represent an independent and identically distributed sample from a  
 934 probability distribution with density function  $f(Y|\theta)$ , and define  $y_1 \dots y_N$  as realizations of this  
 935 sample. If  $f(Y|\theta)$  is derived from a regression model, then the density function may also  
 936 condition on covariates (elsewhere denoted  $X$  and  $x$ ). However, covariate information is not  
 937 pertinent to the derivations below, and are omitted for clarity. The likelihood function is defined  
 938 as follows:

939

$$L(\theta|y_1 \dots y_N) = \prod_{i=1}^N f(y_i|\theta) \quad \#(1)$$

940

941 The natural log of the likelihood function is defined as follows:

942

$$\ell(\theta|y_1 \dots y_N) = \sum_{i=1}^N \log f(y_i|\theta) \quad \#(2)$$

943

944 In Bayesian analysis, the posterior density function is proportional to the likelihood function  
 945 multiplied by the prior density function as follows:

946

$$P(\theta|y_1 \dots y_N) \propto L(\theta|y_1 \dots y_N)P(\theta) \quad \#(3)$$

947  
948  
949  
950  
951  
952  
953

**13.1 Equivalence of MAP and MLE with Flat Prior**

A “flat prior” density function is defined to be proportional to 1 for all values of  $\theta$ . Thus, when a flat prior is specified, the posterior density function is proportional to the likelihood function. In addition, the maximum *a posteriori* (MAP) estimator of  $\theta$  is also a maximum likelihood estimator (MLE):

$$\hat{\theta} = \arg \max_{\theta} P(\theta|y_1 \dots y_N) = \arg \max_{\theta} L(\theta|y_1 \dots y_N) = \arg \max_{\theta} \ell(\theta|y_1 \dots y_N) \#(4)$$

954  
955  
956  
957

**13.2 Asymptotic Normality of MLE**

Under regularity conditions, the MLE converges in distribution to a normal distribution:

$$\hat{\theta} \xrightarrow{d} N(\theta_0, I^{-1}) \#(5)$$

958  
959  
960

where  $\theta_0$  is the true but unknown value of  $\theta$ , and  $I$  is the Fisher information:

$$I = E_{\theta_0} \left[ -\frac{\partial^2}{\partial \theta^2} \ell(\theta_0|Y_1 \dots Y_N) \right] \#(6)$$

961  
962  
963  
964

In practice, because  $\theta_0$  is unknown, inferences about  $\theta_0$  are made by substituting  $\hat{\theta}$  in place of  $\theta_0$  and the observed information is substituted in place of the Fisher information:

$$\hat{\theta} \sim N(\hat{\theta}, \hat{I}^{-1}) \#(7)$$

965  
966  
967

The observed information is the negative Hessian of the log likelihood function evaluated at  $\hat{\theta}$ :

$$\hat{I} = \left[ -\frac{\partial^2}{\partial \theta^2} \ell(\theta|y_1 \dots y_N) \right]_{\theta=\hat{\theta}} \#(8)$$

968  
969  
970  
971  
972  
973

**13.3 Laplace Approximation to Posterior**

The Laplace approximation to a posterior density function (or any density function) is based on a two-term Taylor expansion of the natural log of the density function about  $\hat{\theta}$ :

$$q(\theta) \approx q(\hat{\theta}) + (\theta - \hat{\theta})q'(\hat{\theta}) + \frac{1}{2}(\theta - \hat{\theta})^T q''(\hat{\theta})(\theta - \hat{\theta}) \#(9)$$

974  
975  
976  
977  
978

where  $q(\theta)$  is the log posterior density function and  $q'(\hat{\theta})$  and  $q''(\hat{\theta})$  are the gradient and Hessian of  $q(\theta)$ , respectively, evaluated at  $\hat{\theta}$ . When a flat prior is used,  $q(\theta)$  is equal to the log likelihood function plus a constant  $c$ :

$$q(\theta) = \log P(\theta|y_1 \dots y_N) = \ell(\theta|y_1 \dots y_N) + c \#(10)$$

979  
980  
981

Because  $\hat{\theta}$  is defined to be the MAP estimate,  $q'(\hat{\theta}) = 0$ . Thus, expression (9) simplifies:

$$q(\theta) \approx -\frac{1}{2}(\theta - \hat{\theta})^T [-q''(\hat{\theta})](\theta - \hat{\theta}) + c \#(11)$$

982  
983  
984

where the negative Hessian is identical to the observed information when a flat prior is used:

$$-q''(\hat{\theta}) = \left[ -\frac{\partial^2}{\partial \theta^2} \log P(\theta | y_1 \dots y_N) \right]_{\theta = \hat{\theta}} = \left[ -\frac{\partial^2}{\partial \theta^2} \ell(\theta | y_1 \dots y_N) \right]_{\theta = \hat{\theta}} = \hat{I} \#(12)$$

985  
986  
987  
988  
989

Exponentiating expression (11) demonstrates that the Laplace approximation to the posterior density must be a normal density with mean  $\hat{\theta}$  and variance-covariance  $\hat{I}^{-1}$ . This is identical to the asymptotic sampling distribution of the MLE given in expression (7):

$$(\theta | y_1 \dots y_N) \sim N(\hat{\theta}, \hat{I}^{-1}) \#(13)$$

990  
991  
992  
993

Under regularity conditions, the Bernstein-von Mises theorem provides asymptotic guarantees regarding the quality of the Laplace approximation.
