# Supplementary material
Source: PubMed Central journal article supplement (PMC10091180)
Supplement: jama-e233546-s004.pdf [file jama-e233546-s004.pdf]

\*First name, last name, and suffix (if applicable) are required and will appear in PubMed.

| <b>*Group Name(s): ACTIV-4 Host Tissue Investigators</b> |                   |                              |                  |                                           |                                          |                                                         |                                                                                            |
|----------------------------------------------------------|-------------------|------------------------------|------------------|-------------------------------------------|------------------------------------------|---------------------------------------------------------|--------------------------------------------------------------------------------------------|
| <b>*First Name and Middle Initial(s)</b>                 | <b>*Last Name</b> | <b>*Suffix (eg, Jr, III)</b> | Academic Degrees | Institution                               | Location (city, state/province, country) | Role or Contribution, eg, chair, principal investigator | Group (if more than 1 Group listed in the byline) and/or Subgroup (eg, Steering Committee) |
| Richard C.                                               | Becker            |                              | MD               | University of Cincinnati                  | Cincinnati, OH, USA                      | DSMB Chair                                              |                                                                                            |
| Gregory                                                  | del Zoppo         |                              | MD               | University of Washington                  | Seattle, WA, USA                         | DSMB Member                                             |                                                                                            |
| Peter                                                    | Henke             |                              | MD               | University of Michigan                    | Ann Arbor, MI, USA                       | DSMB Member                                             |                                                                                            |
| Richard                                                  | Holubkov          |                              | PhD              | University of Utah                        | Salt Lake City, UT, USA                  | DSMB Member                                             |                                                                                            |
| Maryl                                                    | Johnson           |                              | MD               | University of Wisconsin                   | Madison, WI, USA                         | DSMB Member                                             |                                                                                            |
| Kim                                                      | Kerr              |                              | MD               | University of San Diego                   | La Jolla, CA, USA                        | DSMB Member                                             |                                                                                            |
| Hannah I.                                                | Lipman            |                              | MD               | Hackensack University Medical Center      | Hackensack, NJ, USA                      | DSMB Member                                             |                                                                                            |
| Fedor                                                    | Lurie             |                              | MD, PhD          | University of Michigan                    | Ann Arbor, MI, USA                       | DSMB Member                                             |                                                                                            |
| Bertram                                                  | Pitt              |                              | MD               | University of Michigan Health System      | Ann Arbor, MI, USA                       | DSMB Member                                             |                                                                                            |
| Sara K.                                                  | Vesely            |                              | PhD              | University of Oklahoma                    | Oklahoma City, OK, USA                   | DSMB Member                                             |                                                                                            |
| Jerome L.                                                | Fleg              |                              | MD               | National Heart, Lung, and Blood Institute | Bethesda, MD, USA                        | DSMB Executive Secretary                                |                                                                                            |
| Dave                                                     | Aamodt            |                              |                  | Vanderbilt University Medical Center      | Nashville, TN, USA                       | Coordinating Center                                     |                                                                                            |
| J'Mario                                                  | Ayers             |                              |                  | Vanderbilt University Medical Center      | Nashville, TN, USA                       | Coordinating Center                                     |                                                                                            |
| Debra                                                    | Clark             |                              |                  | Vanderbilt University Medical Center      | Nashville, TN, USA                       | Coordinating Center                                     |                                                                                            |
| Jessica                                                  | Collins           |                              |                  | Vanderbilt University Medical Center      | Nashville, TN, USA                       | Coordinating Center                                     |                                                                                            |
| Maya                                                     | Cook              |                              |                  | Vanderbilt University Medical Center      | Nashville, TN, USA                       | Coordinating Center                                     |                                                                                            |
| Sheri                                                    | Dixon             |                              | RN, BSN          | Vanderbilt University Medical Center      | Nashville, TN, USA                       | Coordinating Center                                     |                                                                                            |
| John                                                     | Graves            |                              |                  | Vanderbilt University Medical Center      | Nashville, TN, USA                       | Coordinating Center                                     |                                                                                            |
| Courtney                                                 | Jordan            |                              |                  | Vanderbilt University Medical Center      | Nashville, TN, USA                       | Coordinating Center                                     |                                                                                            |
| Christopher J.                                           | Lindsell          |                              | PhD              | Vanderbilt University Medical Center      | Nashville, TN, USA                       | Coordinating Center                                     |                                                                                            |
| Itzel                                                    | Lopez             |                              |                  | Vanderbilt University Medical Center      | Nashville, TN, USA                       | Coordinating Center                                     |                                                                                            |
| David                                                    | McKeel            |                              |                  | Vanderbilt University Medical Center      | Nashville, TN, USA                       | Coordinating Center                                     |                                                                                            |
| Dirk                                                     | Orozco            |                              |                  | Vanderbilt University Medical Center      | Nashville, TN, USA                       | Coordinating Center                                     |                                                                                            |
| Nelson                                                   | Prato             |                              |                  | Vanderbilt University Medical Center      | Nashville, TN, USA                       | Coordinating Center                                     |                                                                                            |
| Ally                                                     | Qi                |                              | MPH              | Vanderbilt University Medical Center      | Nashville, TN, USA                       | Coordinating Center                                     |                                                                                            |
| Madiha                                                   | Qutab             |                              | MS               | Vanderbilt University Medical Center      | Nashville, TN, USA                       | Coordinating Center                                     |                                                                                            |
| Christa                                                  | Stoughton         |                              |                  | Vanderbilt University Medical Center      | Nashville, TN, USA                       | Coordinating Center                                     |                                                                                            |
| Krista                                                   | Vermillion        |                              |                  | Vanderbilt University Medical Center      | Nashville, TN, USA                       | Coordinating Center                                     |                                                                                            |
| Kelly                                                    | Walsh             |                              |                  | Vanderbilt University Medical Center      | Nashville, TN, USA                       | Coordinating Center                                     |                                                                                            |
| Stephanie                                                | Winchell          |                              |                  | Vanderbilt University Medical Center      | Nashville, TN, USA                       | Coordinating Center                                     |                                                                                            |
| Taylor                                                   | Young             |                              |                  | Vanderbilt University Medical Center      | Nashville, TN, USA                       | Coordinating Center                                     |                                                                                            |
| Richard                                                  | Franklin          |                              | MD, PhD          | Constant Therapeutics                     | Boston, MA, USA                          | Industry partner for drug supply                        |                                                                                            |

## Supplemental Online Content: Nonauthor Collaborators

\*First name, last name, and suffix (if applicable) are required and will appear in PubMed.

| *First Name and Middle Initial(s) | *Last Name | *Suffix (eg, Jr, III) | Academic Degrees | Institution                                     | Location (city, state/province, country) | Role or Contribution, eg, chair, principal investigator | Group (if more than 1 Group listed in the byline) and/or Subgroup (eg, Steering Committee) |
|-----------------------------------|------------|-----------------------|------------------|-------------------------------------------------|------------------------------------------|---------------------------------------------------------|--------------------------------------------------------------------------------------------|
| Elizabeth                         | Wagner     |                       | MS, MBA          | Constant Therapeutics                           | Boston, MA, USA                          | Industry partner for drug supply                        |                                                                                            |
| Thomas                            | Walther    |                       | PhD              | Constant Therapeutics                           | Boston, MA, USA                          | Industry partner for drug supply                        |                                                                                            |
| Mark                              | Demitrack  |                       | MD               | Trevena                                         | Chesterbrook, PA, USA                    | Industry partner for drug supply                        |                                                                                            |
| Jakea                             | Johnson    |                       | MPH              | Vanderbilt University Medical Center            | Nashville, TN, USA                       | Enrolling site study personnel                          |                                                                                            |
| Ryan                              | Walsh      |                       | MD               | Vanderbilt University Medical Center            | Nashville, TN, USA                       | Enrolling site study personnel                          |                                                                                            |
| Brian                             | Bales      |                       | MD               | Vanderbilt University Medical Center            | Nashville, TN, USA                       | Enrolling site study personnel                          |                                                                                            |
| Karen                             | Miller     |                       | RN               | Vanderbilt University Medical Center            | Nashville, TN, USA                       | Enrolling site study personnel                          |                                                                                            |
| Donna                             | Torr       |                       | PharmD           | Vanderbilt University Medical Center            | Nashville, TN, USA                       | Enrolling site study personnel                          |                                                                                            |
| Harsh                             | Barot      |                       | MD               | Wake Forest University                          | Winston-Salem, NC, USA                   | Enrolling site study personnel                          |                                                                                            |
| Leigha                            | Landreth   |                       | RN               | Wake Forest University                          | Winston-Salem, NC, USA                   | Enrolling site study personnel                          |                                                                                            |
| Mary                              | LaRose     |                       | RN               | Wake Forest University                          | Winston-Salem, NC, USA                   | Enrolling site study personnel                          |                                                                                            |
| Lisa                              | Parks      |                       | RN               | Wake Forest University                          | Winston-Salem, NC, USA                   | Enrolling site study personnel                          |                                                                                            |
| J. Pedro                          | Teixeira   |                       |                  | University of New Mexico Health Sciences Center | Albuquerque, NM, USA                     | Enrolling site study personnel                          |                                                                                            |
| Sandra                            | Cardenas   |                       |                  | University of New Mexico Health Sciences Center | Albuquerque, NM, USA                     | Enrolling site study personnel                          |                                                                                            |
| Juan A.                           | Ceniceros  |                       |                  | University of New Mexico Health Sciences Center | Albuquerque, NM, USA                     | Enrolling site study personnel                          |                                                                                            |
| Amy G.                            | Cunningham |                       |                  | University of New Mexico Health Sciences Center | Albuquerque, NM, USA                     | Enrolling site study personnel                          |                                                                                            |
| Susan                             | Kunkel     |                       |                  | University of New Mexico Health Sciences Center | Albuquerque, NM, USA                     | Enrolling site study personnel                          |                                                                                            |
| Debbie M.                         | Lovato     |                       |                  | University of New Mexico Health Sciences Center | Albuquerque, NM, USA                     | Enrolling site study personnel                          |                                                                                            |

Supplemental Online Content: Nonauthor Collaborators

\*First name, last name, and suffix (if applicable) are required and will appear in PubMed.

| *First Name and Middle Initial(s) | *Last Name | *Suffix (eg, Jr, III) | Academic Degrees     | Institution                           | Location (city, state/province, country) | Role or Contribution, eg, chair, principal investigator | Group (if more than 1 Group listed in the byline) and/or Subgroup (eg, Steering Committee) |
|-----------------------------------|------------|-----------------------|----------------------|---------------------------------------|------------------------------------------|---------------------------------------------------------|--------------------------------------------------------------------------------------------|
| Brooklin                          | Zimmerman  |                       | MSN                  | University of Nebraska Medical Center | Omaha, NE, USA                           | Enrolling site study personnel                          |                                                                                            |
| Thanh                             | Nguyen     |                       | PhD, MSN, FNP-C      | University of Nebraska Medical Center | Omaha, NE, USA                           | Enrolling site study personnel                          |                                                                                            |
| Wesley                            | Zeger      |                       | DO                   | University of Nebraska Medical Center | Omaha NE 68105                           | Enrolling site study personnel                          |                                                                                            |
| Heather                           | Nichols    |                       | MBA                  | University of Nebraska Medical Center |                                          |                                                         |                                                                                            |
| Noah                              | Wiedel     |                       | MD                   | University of Nebraska Medical Center | Omaha, NE, USA                           | Enrolling site study personnel                          |                                                                                            |
| Ali                               | Javaheri   |                       | MD, PhD              | Washington University                 | St. Louis, MO, USA                       | Enrolling site study personnel                          |                                                                                            |
| Stephanie                         | Stilinovic |                       | BSN, RN              | Washington University                 | St. Louis, MO, USA                       | Enrolling site study personnel                          |                                                                                            |
| Carolyn                           | Brokowski  |                       |                      | Yale University                       | New Haven, CT, USA                       | Enrolling site study personnel                          |                                                                                            |
| Jing                              | Lu         |                       |                      | Yale University                       | New Haven, CT, USA                       | Enrolling site study personnel                          |                                                                                            |
| Muriel                            | Solberg    |                       |                      | Yale University                       | New Haven, CT, USA                       | Enrolling site study personnel                          |                                                                                            |
| Dana                              | Lee        |                       |                      | Yale University                       | New Haven, CT, USA                       | Enrolling site study personnel                          |                                                                                            |
| Kristopher                        | Roach      |                       | MD                   | Dignity Health Research Institute     | Chandler, AZ, USA                        | Enrolling site study personnel                          |                                                                                            |
| Brian                             | Tiffany    |                       | MD, PhD              | Dignity Health Research Institute     | Chandler, AZ, USA                        | Enrolling site study personnel                          |                                                                                            |
| Charlotte                         | Tanner     |                       | RN, BSN              | Dignity Health Research Institute     | Chandler, AZ, USA                        | Enrolling site study personnel                          |                                                                                            |
| Annette                           | Taylor     |                       | RN, BSN, CCRC        | Dignity Health Research Institute     | Chandler, AZ, USA                        | Enrolling site study personnel                          |                                                                                            |
| Jennine                           | Zumbahl    |                       | RN, MSHA, CCRC, CRCP | Dignity Health Research Institute     | Chandler, AZ, USA                        | Enrolling site study personnel                          |                                                                                            |
| Aamer                             | Syed       |                       | MD                   | Virginia Commonwealth University      | Richmond, VA, USA                        | Enrolling site study personnel                          |                                                                                            |
| Jessica                           | Mason      |                       | MPH                  | Virginia Commonwealth University      | Richmond, VA, USA                        | Enrolling site study personnel                          |                                                                                            |

## Supplemental Online Content: Nonauthor Collaborators

\*First name, last name, and suffix (if applicable) are required and will appear in PubMed.

| *First Name and Middle Initial(s) | *Last Name | *Suffix (eg, Jr, III) | Academic Degrees | Institution                        | Location (city, state/province, country) | Role or Contribution, eg, chair, principal investigator | Group (if more than 1 Group listed in the byline) and/or Subgroup (eg, Steering Committee) |
|-----------------------------------|------------|-----------------------|------------------|------------------------------------|------------------------------------------|---------------------------------------------------------|--------------------------------------------------------------------------------------------|
| Patrick E. H.                     | Jackson    |                       | MD               | University of Virginia             | Charlottesville, VA, USA                 | Enrolling site study personnel                          |                                                                                            |
| Rachael W.                        | Coleman    |                       | MPH              | University of Virginia             | Charlottesville, VA, USA                 | Enrolling site study personnel                          |                                                                                            |
| Heather M.                        | Haughey    |                       | PhD              | University of Virginia             | Charlottesville, VA, USA                 | Enrolling site study personnel                          |                                                                                            |
| Kartik                            | Cherabuddi |                       | MD               | University of Florida, Gainesville | Gainesville, FL, USA                     | Enrolling site study personnel                          |                                                                                            |
| Nastasia                          | James      |                       |                  | University of Florida, Gainesville | Gainesville, FL, USA                     | Enrolling site study personnel                          |                                                                                            |
| Rebecca                           | Wakeman    |                       | MSW CCRC         | University of Florida, Gainesville | Gainesville, FL, USA                     | Enrolling site study personnel                          |                                                                                            |
| Christopher                       | Duncan     |                       |                  | University of Florida, Gainesville | Gainesville, FL, USA                     | Enrolling site study personnel                          |                                                                                            |
| Cynthia                           | Montero    |                       | MS               | University of Florida, Gainesville | Gainesville, FL, USA                     | Enrolling site study personnel                          |                                                                                            |
| Angela J.                         | Rogers     |                       | MD, MPH          | Stanford University                | Stanford, CA, USA                        | Enrolling site study personnel                          |                                                                                            |
| Jennifer G.                       | Wilson     |                       | MD, MS           | Stanford University                | Stanford, CA, USA                        | Enrolling site study personnel                          |                                                                                            |
| Rosemary                          | Vojnik     |                       | BS               | Stanford University                | Stanford, CA, USA                        | Enrolling site study personnel                          |                                                                                            |
| Cynthia                           | Perez      |                       | BS               | Stanford University                | Stanford, CA, USA                        | Enrolling site study personnel                          |                                                                                            |
| David                             | Wyles      |                       | MD               | Denver Health Medical Center       | Denver, CO, USA                          | Enrolling site study personnel                          |                                                                                            |
| Terra D.                          | Hiller     |                       | RN, MSN          | Denver Health Medical Center       | Denver, CO, USA                          | Enrolling site study personnel                          |                                                                                            |
| Judy L.                           | Oakes      |                       | PhD              | Denver Health Medical Center       | Denver, CO, USA                          | Enrolling site study personnel                          |                                                                                            |
| Ana Z.                            | Garcia     |                       | BS               | Denver Health Medical Center       | Denver, CO, USA                          | Enrolling site study personnel                          |                                                                                            |
| Michelle                          | Gong       |                       | MD               | Montefiore Medical Center          | Bronx, NY, USA                           | Enrolling site study personnel                          |                                                                                            |
| Amira                             | Mohamed    |                       |                  | Montefiore Medical Center          | Bronx, NY, USA                           | Enrolling site study personnel                          |                                                                                            |

## Supplemental Online Content: Nonauthor Collaborators

\*First name, last name, and suffix (if applicable) are required and will appear in PubMed.

| *First Name and Middle Initial(s) | *Last Name  | *Suffix (eg, Jr, III) | Academic Degrees | Institution                                            | Location (city, state/province, country) | Role or Contribution, eg, chair, principal investigator | Group (if more than 1 Group listed in the byline) and/or Subgroup (eg, Steering Committee) |
|-----------------------------------|-------------|-----------------------|------------------|--------------------------------------------------------|------------------------------------------|---------------------------------------------------------|--------------------------------------------------------------------------------------------|
| Luke                              | Andrea      |                       |                  | Montefiore Medical Center                              | Bronx, NY, USA                           | Enrolling site study personnel                          |                                                                                            |
| Rahul                             | Nair        |                       |                  | Montefiore Medical Center                              | Bronx, NY, USA                           | Enrolling site study personnel                          |                                                                                            |
| William                           | Nkemdirim   |                       |                  | Montefiore Medical Center                              | Bronx, NY, USA                           | Enrolling site study personnel                          |                                                                                            |
| Brenda                            | Lopez       |                       |                  | Montefiore Medical Center                              | Bronx, NY, USA                           | Enrolling site study personnel                          |                                                                                            |
| Sabah                             | Boujid      |                       |                  | Montefiore Medical Center                              | Bronx, NY, USA                           | Enrolling site study personnel                          |                                                                                            |
| Martha                            | Torres      |                       |                  | Montefiore Medical Center                              | Bronx, NY, USA                           | Enrolling site study personnel                          |                                                                                            |
| Ofelia                            | Garcia      |                       |                  | Montefiore Medical Center                              | Bronx, NY, USA                           | Enrolling site study personnel                          |                                                                                            |
| Flora                             | Martinez    |                       | MPH, RN          | University of Colorado                                 | Aurora, CO, USA                          | Enrolling site study personnel                          |                                                                                            |
| Amiran                            | Baduashvili |                       | MD               | University of Colorado                                 | Aurora, CO, USA                          | Enrolling site study personnel                          |                                                                                            |
| Jill                              | Bastman     |                       | BSN, RN          | University of Colorado                                 | Aurora, CO, USA                          | Enrolling site study personnel                          |                                                                                            |
| Lakshmi                           | Chauhan     |                       | MD               | University of Colorado                                 | Aurora, CO, USA                          | Enrolling site study personnel                          |                                                                                            |
| David J.                          | Douin       |                       | MD               | University of Colorado                                 | Aurora, CO, USA                          | Enrolling site study personnel                          |                                                                                            |
| Lani                              | Finck       |                       | MPH              | University of Colorado                                 | Aurora, CO, USA                          | Enrolling site study personnel                          |                                                                                            |
| Ashley                            | Licursi     |                       | PAC              | University of Colorado                                 | Aurora, CO, USA                          | Enrolling site study personnel                          |                                                                                            |
| Caitlin                           | ten Lohuis  |                       |                  | Emory Johns Creek Hospital/Emory St. Joseph's Hospital | Atlanta, GA, USA                         | Enrolling site study personnel                          |                                                                                            |
| Sophia                            | Zhang       |                       |                  | Emory Johns Creek Hospital/Emory St. Joseph's Hospital | Atlanta, GA, USA                         | Enrolling site study personnel                          |                                                                                            |
| William                           | Bender      |                       | MD               | Emory Johns Creek Hospital/Emory St. Joseph's Hospital | Atlanta, GA, USA                         | Enrolling site study personnel                          |                                                                                            |
| Santiago                          | Tovar       |                       |                  | Emory Johns Creek Hospital/Emory St. Joseph's Hospital | Atlanta, GA, USA                         | Enrolling site study personnel                          |                                                                                            |

## Supplemental Online Content: Nonauthor Collaborators

\*First name, last name, and suffix (if applicable) are required and will appear in PubMed.

| *First Name and Middle Initial(s) | *Last Name | *Suffix (eg, Jr, III) | Academic Degrees | Institution                          | Location (city, state/province, country) | Role or Contribution, eg, chair, principal investigator | Group (if more than 1 Group listed in the byline) and/or Subgroup (eg, Steering Committee) |
|-----------------------------------|------------|-----------------------|------------------|--------------------------------------|------------------------------------------|---------------------------------------------------------|--------------------------------------------------------------------------------------------|
| Sharon                            | Hayes      |                       | RN               | Beth Israel Deaconess Medical Center | Boston, MA, USA                          | Enrolling site study personnel                          |                                                                                            |
| Nicholas                          | Kurtzman   |                       | MD               | Beth Israel Deaconess Medical Center | Boston, MA, USA                          | Enrolling site study personnel                          |                                                                                            |
| Elinita                           | Rosseto    |                       |                  | Beth Israel Deaconess Medical Center | Boston, MA, USA                          | Enrolling site study personnel                          |                                                                                            |
| Douglas                           | Scaffidi   |                       |                  | Beth Israel Deaconess Medical Center | Boston, MA, USA                          | Enrolling site study personnel                          |                                                                                            |
| Nathan                            | Shapiro    |                       | MD, MPH          | Beth Israel Deaconess Medical Center | Boston, MA, USA                          | Enrolling site study personnel                          |                                                                                            |
| Jonathan                          | Pak        |                       | MD               | Oregon Health and Science University | Portland, OR, USA                        | Enrolling site study personnel                          |                                                                                            |
| Gopal                             | Allada     |                       | MD               | Oregon Health and Science University | Portland, OR, USA                        | Enrolling site study personnel                          |                                                                                            |
| Genesis                           | Briceno    |                       | MD               | Oregon Health and Science University | Portland, OR, USA                        | Enrolling site study personnel                          |                                                                                            |
| Jose                              | Peña       |                       | MD               | Oregon Health and Science University | Portland, OR, USA                        | Enrolling site study personnel                          |                                                                                            |
| Minn                              | Oh         |                       | PhD              | Oregon Health and Science University | Portland, OR, USA                        | Enrolling site study personnel                          |                                                                                            |
| Harith                            | Ali        |                       | MBChB            | Johns Hopkins University             | Baltimore, MD, USA                       | Enrolling site study personnel                          |                                                                                            |
| Sasha                             | Beselman   |                       | PharmD, MBA      | Johns Hopkins University             | Baltimore, MD, USA                       | Enrolling site study personnel                          |                                                                                            |
| Yolanda                           | Eby        |                       | MS               | Johns Hopkins University             | Baltimore, MD, USA                       | Enrolling site study personnel                          |                                                                                            |
| Vitaliy                           | Klimov     |                       | PharmD           | Johns Hopkins University             | Baltimore, MD, USA                       | Enrolling site study personnel                          |                                                                                            |
| R. Duncan                         | Hite       |                       | MD               | University of Cincinnati             | Cincinnati, OH, USA                      | Enrolling site study personnel                          |                                                                                            |
| Hammad                            | Tanzeem    |                       |                  | University of Cincinnati             | Cincinnati, OH, USA                      | Enrolling site study personnel                          |                                                                                            |
| Chris                             | Droege     |                       |                  | University of Cincinnati             | Cincinnati, OH, USA                      | Enrolling site study personnel                          |                                                                                            |
| Jessica                           | Winter     |                       |                  | University of Cincinnati             | Cincinnati, OH, USA                      | Enrolling site study personnel                          |                                                                                            |

## Supplemental Online Content: Nonauthor Collaborators

\*First name, last name, and suffix (if applicable) are required and will appear in PubMed.

| *First Name and Middle Initial(s) | *Last Name   | *Suffix (eg, Jr, III) | Academic Degrees | Institution                                                    | Location (city, state/province, country) | Role or Contribution, eg, chair, principal investigator | Group (if more than 1 Group listed in the byline) and/or Subgroup (eg, Steering Committee) |
|-----------------------------------|--------------|-----------------------|------------------|----------------------------------------------------------------|------------------------------------------|---------------------------------------------------------|--------------------------------------------------------------------------------------------|
| Susan                             | Jackman      |                       |                  | Cedars-Sinai Medical Center                                    | Los Angeles, CA, USA                     | Enrolling site study personnel                          |                                                                                            |
| Antonina                          | Caudill      |                       |                  | Cedars-Sinai Medical Center                                    | Los Angeles, CA, USA                     | Enrolling site study personnel                          |                                                                                            |
| Emad                              | Bayoumi      |                       |                  | Cedars-Sinai Medical Center                                    | Los Angeles, CA, USA                     | Enrolling site study personnel                          |                                                                                            |
| Ethan                             | Pascual      |                       |                  | Cedars-Sinai Medical Center                                    | Los Angeles, CA, USA                     | Enrolling site study personnel                          |                                                                                            |
| Po-En                             | Chen         |                       |                  | Cedars-Sinai Medical Center                                    | Los Angeles, CA, USA                     | Enrolling site study personnel                          |                                                                                            |
| Simon                             | Mucha        |                       | MD               | Cleveland Clinic Foundation/Cleveland Clinic Fairview Hospital | Cleveland, OH, USA                       | Enrolling site study personnel                          |                                                                                            |
| Nirosshan                         | Thiruchelvam |                       | MD               | Cleveland Clinic Foundation/Cleveland Clinic Fairview Hospital | Cleveland, OH, USA                       | Enrolling site study personnel                          |                                                                                            |
| Matthew                           | Siuba        |                       | MD               | Cleveland Clinic Foundation/Cleveland Clinic Fairview Hospital | Cleveland, OH, USA                       | Enrolling site study personnel                          |                                                                                            |
| Omar                              | Mekhri       |                       | MD               | Cleveland Clinic Foundation/Cleveland Clinic Fairview Hospital | Cleveland, OH, USA                       | Enrolling site study personnel                          |                                                                                            |
| Brian E.                          | Driver       |                       | MD               | Hennepin County Medical Center                                 | Minneapolis, MN, USA                     | Enrolling site study personnel                          |                                                                                            |
| Audrey F.                         | Hendrickson  |                       | MPH, CCRP        | Hennepin County Medical Center                                 | Minneapolis, MN, USA                     | Enrolling site study personnel                          |                                                                                            |
| Olivia R.                         | Kaus         |                       | BS               | Hennepin County Medical Center                                 | Minneapolis, MN, USA                     | Enrolling site study personnel                          |                                                                                            |
| Christina                         | Ontiveros    |                       |                  | Ochsner Clinic Foundation                                      | New Orleans, LA, USA                     | Enrolling site study personnel                          |                                                                                            |
| Amy                               | Riehm        |                       |                  | Ochsner Clinic Foundation                                      | New Orleans, LA, USA                     | Enrolling site study personnel                          |                                                                                            |
| Sylvia                            | Laudun       |                       |                  | Ochsner Clinic Foundation                                      | New Orleans, LA, USA                     | Enrolling site study personnel                          |                                                                                            |
| Debra                             | Hudock       |                       | MSN              | Cleveland Clinic Akron General                                 | Akron, OH, USA                           | Enrolling site study personnel                          |                                                                                            |
| Christopher                       | Ensley       |                       | PharmD           | Cleveland Clinic Akron General                                 | Akron, OH, USA                           | Enrolling site study personnel                          |                                                                                            |
| Valerie                           | Shaner       |                       | RRT              | Cleveland Clinic Akron General                                 | Akron, OH, USA                           | Enrolling site study personnel                          |                                                                                            |

Supplemental Online Content: Nonauthor Collaborators

\*First name, last name, and suffix (if applicable) are required and will appear in PubMed.

| *First Name and Middle Initial(s) | *Last Name        | *Suffix (eg, Jr, III) | Academic Degrees | Institution                               | Location (city, state/province, country) | Role or Contribution, eg, chair, principal investigator | Group (if more than 1 Group listed in the byline) and/or Subgroup (eg, Steering Committee) |
|-----------------------------------|-------------------|-----------------------|------------------|-------------------------------------------|------------------------------------------|---------------------------------------------------------|--------------------------------------------------------------------------------------------|
| Nina                              | Gentile           |                       | MD               | Temple University                         | Philadelphia, PA, USA                    | Enrolling site study personnel                          |                                                                                            |
| Derek                             | Isenberg          |                       | MD               | Temple University                         | Philadelphia, PA, USA                    | Enrolling site study personnel                          |                                                                                            |
| Hannah                            | Reimer            |                       | BSN              | Temple University                         | Philadelphia, PA, USA                    | Enrolling site study personnel                          |                                                                                            |
| Paul                              | Cincola           |                       | BA               | Temple University                         | Philadelphia, PA, USA                    | Enrolling site study personnel                          |                                                                                            |
| Estelle S.                        | Harris            |                       | MD               | University of Utah Health Sciences Center | Salt Lake City, UT, USA                  | Enrolling site study personnel                          |                                                                                            |
| Sean J.                           | Callahan          |                       | MD               | University of Utah Health Sciences Center | Salt Lake City, UT, USA                  | Enrolling site study personnel                          |                                                                                            |
| Misty B.                          | Yamane            |                       | BS               | University of Utah Health Sciences Center | Salt Lake City, UT, USA                  | Enrolling site study personnel                          |                                                                                            |
| Macy AG                           | Barrios           |                       | BS               | University of Utah Health Sciences Center | Salt Lake City, UT, USA                  | Enrolling site study personnel                          |                                                                                            |
| Neeraj                            | Desai             |                       | MD               | Alexian Brothers Medical Center           | Elk Grove Village, IL, USA               | Enrolling site study personnel                          |                                                                                            |
| Amit                              | Bharara           |                       | MD               | Alexian Brothers Medical Center           | Elk Grove Village, IL, USA               | Enrolling site study personnel                          |                                                                                            |
| Michael                           | Keller            |                       | MD               | Alexian Brothers Medical Center           | Elk Grove Village, IL, USA               | Enrolling site study personnel                          |                                                                                            |
| Prat                              | Majumder          |                       | MD               | Alexian Brothers Medical Center           | Elk Grove Village, IL, USA               | Enrolling site study personnel                          |                                                                                            |
| Carrie                            | Dohe              |                       |                  | Alexian Brothers Medical Center           | Elk Grove Village, IL, USA               | Enrolling site study personnel                          |                                                                                            |
| Jeanine                           | D'Armiento        |                       | MD, PhD          | Columbia University Medical Center        | New York, NY, USA                        | Enrolling site study personnel                          |                                                                                            |
| Monica                            | Goldklang         |                       | MD               | Columbia University Medical Center        | New York, NY, USA                        | Enrolling site study personnel                          |                                                                                            |
| Gebhard                           | Wagener           |                       | MD               | Columbia University Medical Center        | New York, NY, USA                        | Enrolling site study personnel                          |                                                                                            |
| Laura                             | Fonseca           |                       |                  | Columbia University Medical Center        | New York, NY, USA                        | Enrolling site study personnel                          |                                                                                            |
| Itzel                             | Valezquez-Sanchez |                       |                  | Columbia University Medical Center        | New York, NY, USA                        | Enrolling site study personnel                          |                                                                                            |



## Supplemental Online Content: Nonauthor Collaborators

\*First name, last name, and suffix (if applicable) are required and will appear in PubMed.

| *First Name and Middle Initial(s) | *Last Name | *Suffix (eg, Jr, III) | Academic Degrees | Institution                         | Location (city, state/province, country) | Role or Contribution, eg, chair, principal investigator | Group (if more than 1 Group listed in the byline) and/or Subgroup (eg, Steering Committee) |
|-----------------------------------|------------|-----------------------|------------------|-------------------------------------|------------------------------------------|---------------------------------------------------------|--------------------------------------------------------------------------------------------|
| Nicholas J.                       | Johnson    |                       |                  | University of Washington Harborview | Seattle, WA, USA                         | Enrolling site study personnel                          |                                                                                            |
| Emily                             | Petersen   |                       |                  | University of Washington Harborview | Seattle, WA, USA                         | Enrolling site study personnel                          |                                                                                            |
| Megan                             | Fuentes    |                       |                  | University of Washington Harborview | Seattle, WA, USA                         | Enrolling site study personnel                          |                                                                                            |
| Maranda                           | Newton     |                       |                  | University of Washington Harborview | Seattle, WA, USA                         | Enrolling site study personnel                          |                                                                                            |
| Stephanie                         | Gundel     |                       |                  | University of Washington Harborview | Seattle, WA, USA                         | Enrolling site study personnel                          |                                                                                            |
| Vasisht                           | Srinivasan |                       |                  | University of Washington Harborview | Seattle, WA, USA                         | Enrolling site study personnel                          |                                                                                            |
| Tessa                             | Steel      |                       |                  | University of Washington Harborview | Seattle, WA, USA                         | Enrolling site study personnel                          |                                                                                            |
| Bryce                             | Robinson   |                       |                  | University of Washington Harborview | Seattle, WA, USA                         | Enrolling site study personnel                          |                                                                                            |
