# Supplementary material
Source: PubMed Central journal article supplement (PMC10091180)
Supplement: jama-e233546-s005.pdf [file jama-e233546-s005.pdf]

## Data Sharing Statement

Self. Renin-Angiotensin System Modulation With Synthetic Angiotensin (1-7) and Angiotensin II Type 1 Receptor-Biased Ligand in Adults With COVID-19. *JAMA*. Published April 11, 2023. doi:10.1001/jama.2023.3546

### Data

**Data available:** Yes

**Data types:** Deidentified participant data, Data dictionary

**How to access data:** Data from this trial will be shared via the National Heart, Lung, and Blood Institute (NHLBI) BioData Catalyst, which can be accessed at:

<https://biodatacatalyst.nhlbi.nih.gov/>. Data will be available approximately 90 days after publication of the primary manuscript reporting trial results. Deidentified, patient-level data with a supporting data dictionary will be available.

**When available:** With publication

### Supporting Documents

**Document types:** None

### Additional Information

**Who can access the data:** Anyone who obtains permission via NIH at <https://biodatacatalyst.nhlbi.nih.gov/>.

**Types of analyses:** For any purpose that results in permission via NIH at <https://biodatacatalyst.nhlbi.nih.gov/>.

**Mechanisms of data availability:** Data will be available from via NIH at <https://biodatacatalyst.nhlbi.nih.gov/> for anyone who obtains permission.
